# Supplementary material for: Multiomics integration reveals the effect of Orexin A on glioblastoma
Source: Frontiers journal article supplement (doi:10.3389/fphar.2023.1096159), 2023-01-20
Supplement: Data_Sheet_1.zip [file Data_Sheet_1.zip]

## Sheet: Sheet1
ONTOLOGY	ID	Description	GeneRatio	BgRatio	pvalue	p.adjust	qvalue	geneID	Count
BP	GO:0048525	negative regulation of viral process	31/1121	92/18723	7.201e-16	4.03904e-12	3.04337e-12	IFITM1/OAS1/MX1/IFIT1/ILF3/APOBEC3F/HMGA2/APOBEC3G/PLSCR1/OASL/IFIH1/STAT1/LY6E/RSAD2/APOBEC3C/IFITM3/OAS2/CHMP3/BST2/ISG15/ISG20/ZFP36/TRIM28/GSN/TRIM21/IFITM2/CCL5/MAVS/PARP10/TRIM5/IFNB1	31
BP	GO:0050792	regulation of viral process	41/1121	164/18723	2.32367e-15	4.55017e-12	3.4285e-12	IFITM1/OAS1/MX1/TRIM22/IFIT1/ILF3/APOBEC3F/AXL/HMGA2/PABPC1/APOBEC3G/PLSCR1/OASL/IFIH1/STAT1/LY6E/LGALS9/DHX9/RSAD2/APOBEC3C/IFITM3/OAS2/PC/CHMP3/BST2/ISG15/ISG20/ZFP36/TRIM28/GSN/HS3ST5/NECTIN2/TRIM21/IFITM2/CCL5/MAVS/DYNLT1/CXCL8/PARP10/TRIM5/IFNB1	41
BP	GO:0045071	negative regulation of viral genome replication	24/1121	56/18723	2.43368e-15	4.55017e-12	3.4285e-12	IFITM1/OAS1/MX1/IFIT1/ILF3/APOBEC3F/HMGA2/APOBEC3G/PLSCR1/OASL/IFIH1/RSAD2/APOBEC3C/IFITM3/OAS2/BST2/ISG15/ISG20/TRIM28/IFITM2/CCL5/MAVS/PARP10/IFNB1	24
BP	GO:1903900	regulation of viral life cycle	37/1121	148/18723	5.38321e-14	7.5486e-11	5.68779e-11	IFITM1/OAS1/MX1/TRIM22/IFIT1/ILF3/APOBEC3F/AXL/HMGA2/PABPC1/APOBEC3G/PLSCR1/OASL/IFIH1/LY6E/LGALS9/RSAD2/APOBEC3C/IFITM3/OAS2/PC/CHMP3/BST2/ISG15/ISG20/TRIM28/GSN/HS3ST5/NECTIN2/TRIM21/IFITM2/CCL5/MAVS/CXCL8/PARP10/TRIM5/IFNB1	37
BP	GO:0009615	response to virus	61/1121	367/18723	3.10891e-13	3.48757e-10	2.62784e-10	ODC1/IFITM1/IFIT3/DDX58/OAS1/MX2/MX1/TRIM22/IFIT2/IFI44/IFIT1/ILF3/APOBEC3F/HERC5/HMGA2/APOBEC3G/NLRC5/HNRNPUL1/PLSCR1/OASL/IFIH1/STAT1/IFI44L/DDIT4/LGALS9/HSP90AA1/DHX9/RSAD2/HMGA1/BCL3/APOBEC3C/HIF1A/IFITM3/OAS2/DHX58/CCT5/IFI6/SMAD3/BST2/NMI/FOSL1/ISG15/ISG20/RTP4/NLRP1/IFI27/NFKB1/GBP1/IFITM2/KCNJ8/CCL5/MAVS/UNC93B1/DDX60/CXCL10/POLR3B/SELENOK/TRIM5/IL23A/IKBKG/IFNB1	61
BP	GO:0019058	viral life cycle	55/1121	317/18723	7.87667e-13	6.825e-10	5.14256e-10	IFITM1/OAS1/MX1/HSP90AB1/TRIM22/IFIT1/CAV1/HSPA8/ILF3/APOBEC3F/AXL/HMGA2/PABPC1/APOBEC3G/PLSCR1/OASL/IFIH1/LY6E/LGALS9/ITGA5/NEDD4/RSAD2/CCL2/ITGB5/APOBEC3C/IFITM3/OAS2/PC/CHMP3/BST2/ISG15/LDLR/NRP1/ISG20/ATG16L2/EFNB3/IFI27/TRIM28/TFRC/GSN/HS3ST5/NECTIN2/MVB12A/TRIM21/IFITM2/EFNB2/CCL5/MAVS/DYNLT1/CXCL8/PARP10/EGFR/TRIM5/IFNB1/VPS37D	55
BP	GO:0016032	viral process	65/1121	415/18723	8.51756e-13	6.825e-10	5.14256e-10	IFITM1/OAS1/MX1/HSP90AB1/TRIM22/IFIT1/CAV1/HSPA8/ILF3/APOBEC3F/AXL/HMGA2/PABPC1/APOBEC3G/PLSCR1/OASL/PTBP1/IFIH1/STAT1/LY6E/LGALS9/RCC1/ITGA5/DHX9/NEDD4/RSAD2/CCL2/ITGB5/APOBEC3C/IFITM3/OAS2/EIF3A/PC/CHMP3/BST2/ISG15/LDLR/NRP1/ISG20/ATG16L2/EFNB3/IFI27/JUN/ZFP36/TRIM28/TFRC/GSN/HCFC1/HS3ST5/GTF2B/NECTIN2/ST6GALNAC2/MVB12A/TRIM21/IFITM2/EFNB2/CCL5/MAVS/DYNLT1/CXCL8/PARP10/EGFR/TRIM5/IFNB1/VPS37D	65
BP	GO:0045069	regulation of viral genome replication	26/1121	85/18723	2.0187e-12	1.41536e-09	1.06646e-09	IFITM1/OAS1/MX1/IFIT1/ILF3/APOBEC3F/HMGA2/PABPC1/APOBEC3G/PLSCR1/OASL/IFIH1/RSAD2/APOBEC3C/IFITM3/OAS2/BST2/ISG15/ISG20/TRIM28/IFITM2/CCL5/MAVS/CXCL8/PARP10/IFNB1	26
BP	GO:0007059	chromosome segregation	55/1121	346/18723	2.7983e-11	1.74396e-08	1.31405e-08	PLK1/BUB1B/KIF4A/DUSP1/CDCA5/SFPQ/NCAPD2/PLSCR1/SPDL1/KPNB1/SGO2/CDCA2/NCAPH/FAM83D/RCC1/HNRNPU/DLGAP5/OIP5/INCENP/SKA3/KIF18B/SLC25A5/CDC20/NCAPG/CENPE/KIF23/NEK2/KIFC1/SKA1/SPAG5/NCAPG2/CENPN/SPC25/ESPL1/CDCA8/BIRC5/SMC2/CENPF/BRCA1/TUBG2/BUB1/KIF14/STAG3L2/KNL1/ECT2/SMC4/P3H4/MKI67/SMC1A/CHAMP1/NDC1/STAG1/ARL8A/ESCO1/CDC26	55
BP	GO:0051607	defense response to virus	46/1121	265/18723	5.88465e-11	3.00064e-08	2.26094e-08	IFITM1/IFIT3/DDX58/OAS1/MX2/MX1/TRIM22/IFIT2/IFIT1/ILF3/APOBEC3F/HERC5/APOBEC3G/NLRC5/PLSCR1/OASL/IFIH1/STAT1/IFI44L/DDIT4/HSP90AA1/DHX9/RSAD2/APOBEC3C/IFITM3/OAS2/DHX58/IFI6/BST2/ISG15/ISG20/RTP4/NLRP1/IFI27/GBP1/IFITM2/KCNJ8/MAVS/UNC93B1/DDX60/CXCL10/POLR3B/SELENOK/TRIM5/IL23A/IFNB1	46
BP	GO:0140546	defense response to symbiont	46/1121	265/18723	5.88465e-11	3.00064e-08	2.26094e-08	IFITM1/IFIT3/DDX58/OAS1/MX2/MX1/TRIM22/IFIT2/IFIT1/ILF3/APOBEC3F/HERC5/APOBEC3G/NLRC5/PLSCR1/OASL/IFIH1/STAT1/IFI44L/DDIT4/HSP90AA1/DHX9/RSAD2/APOBEC3C/IFITM3/OAS2/DHX58/IFI6/BST2/ISG15/ISG20/RTP4/NLRP1/IFI27/GBP1/IFITM2/KCNJ8/MAVS/UNC93B1/DDX60/CXCL10/POLR3B/SELENOK/TRIM5/IL23A/IFNB1	46
BP	GO:0019079	viral genome replication	30/1121	131/18723	1.37817e-10	6.44179e-08	4.85381e-08	IFITM1/OAS1/MX1/IFIT1/HSPA8/ILF3/APOBEC3F/HMGA2/PABPC1/APOBEC3G/PLSCR1/OASL/IFIH1/RSAD2/CCL2/APOBEC3C/IFITM3/OAS2/BST2/ISG15/ISG20/ATG16L2/IFI27/TRIM28/IFITM2/CCL5/MAVS/CXCL8/PARP10/IFNB1	30
BP	GO:0140014	mitotic nuclear division	47/1121	287/18723	2.81968e-10	1.21658e-07	9.16682e-08	PLK1/TPX2/BUB1B/KIF4A/DUSP1/ANLN/CDCA5/NCAPD2/SPDL1/KPNB1/SGO2/CDCA2/NCAPH/RCC1/AURKA/HNRNPU/DLGAP5/INCENP/KIF11/KIF18B/FLNA/CDC20/NCAPG/CENPE/KIF23/NEK2/KIFC1/EDN1/SPAG5/NCAPG2/ESPL1/CDCA8/SMC2/CENPF/EPS8/TUBG2/BUB1/KIF14/SMC4/KIF3B/MKI67/OBSL1/SMC1A/CHAMP1/KIF20B/STAG1/CDC26	47
BP	GO:0034340	response to type I interferon	19/1121	58/18723	5.10146e-10	1.94984e-07	1.46918e-07	IFITM1/OAS1/MX1/SP100/HSP90AB1/IFIT1/USP18/NLRC5/IRAK1/STAT1/IFITM3/OAS2/ISG15/IFI27/IFITM2/PTPN11/MAVS/WNT5A/IFNB1	19
BP	GO:0071357	cellular response to type I interferon	18/1121	52/18723	5.2144e-10	1.94984e-07	1.46918e-07	IFITM1/OAS1/SP100/HSP90AB1/IFIT1/USP18/NLRC5/IRAK1/STAT1/IFITM3/OAS2/ISG15/IFI27/IFITM2/PTPN11/MAVS/WNT5A/IFNB1	18
BP	GO:0000819	sister chromatid segregation	37/1121	202/18723	9.49163e-10	3.32741e-07	2.50716e-07	PLK1/BUB1B/KIF4A/DUSP1/CDCA5/SFPQ/NCAPD2/SPDL1/KPNB1/SGO2/NCAPH/HNRNPU/DLGAP5/INCENP/KIF18B/CDC20/NCAPG/CENPE/KIF23/NEK2/KIFC1/SPAG5/NCAPG2/ESPL1/CDCA8/SMC2/CENPF/TUBG2/BUB1/KIF14/STAG3L2/SMC4/SMC1A/CHAMP1/STAG1/ESCO1/CDC26	37
BP	GO:0000070	mitotic sister chromatid segregation	33/1121	168/18723	1.20372e-09	3.97156e-07	2.99253e-07	PLK1/BUB1B/KIF4A/DUSP1/CDCA5/NCAPD2/SPDL1/KPNB1/SGO2/NCAPH/HNRNPU/DLGAP5/INCENP/KIF18B/CDC20/NCAPG/CENPE/KIF23/NEK2/KIFC1/SPAG5/NCAPG2/ESPL1/CDCA8/SMC2/CENPF/TUBG2/BUB1/KIF14/SMC4/SMC1A/CHAMP1/CDC26	33
BP	GO:0060337	type I interferon signaling pathway	17/1121	50/18723	2.16978e-09	6.76126e-07	5.09453e-07	IFITM1/OAS1/SP100/HSP90AB1/USP18/NLRC5/IRAK1/STAT1/IFITM3/OAS2/ISG15/IFI27/IFITM2/PTPN11/MAVS/WNT5A/IFNB1	17
BP	GO:0048732	gland development	59/1121	436/18723	3.46666e-09	1.0234e-06	7.71117e-07	SFRP1/SERPINE2/CAV1/ADA/VEGFA/TYMS/IGFBP5/ELF3/ID2/IQGAP3/PNPT1/LY6E/BCL2L11/THRA/AURKA/TGFBR2/WDR77/CSF1/CAD/E2F8/HIF1A/OAS2/HMGCS1/ALDH1A3/DRD2/NRG1/SMAD3/LMO4/ZBTB7B/SERPINA5/CCND1/NRP1/RARG/FOXF1/TBX3/ASS1/AK4/MDK/MESP1/ETS1/DBP/SMARCC1/KRT18/SOX2/SIX4/CPT1A/MET/PTN/MPST/ZNF703/WNT5A/MSX1/TSPO/PRKDC/NEURL1/EGFR/HOXD9/FA2H/CEBPB	59
BP	GO:0045785	positive regulation of cell adhesion	59/1121	437/18723	3.78126e-09	1.06045e-06	7.9904e-07	SFRP1/CAV1/HSPD1/CCDC80/ADA/TPM1/SOX4/VEGFA/B2M/JUP/HLA-E/IL7R/IRAK1/LGALS9/TGFBR2/MAP4K4/CSF1/CCL2/FLNA/ANK3/KDR/SMAD3/BCL6/ZBTB7B/EFNB1/PIEZO1/LIF/NRP1/FOXF1/MALT1/NDNF/HLA-A/EFNB3/FRMD5/TFRC/DUSP10/PREX1/MDK/ETS1/IQGAP1/THY1/SOX2/EFEMP2/PTN/FBLN2/PTPN11/RAC3/CCL5/CD70/WNT5A/KIF26B/SLC7A1/RELL2/RRAS/SELENOK/EGR3/IL23A/UTRN/IGFBP2	59
BP	GO:0031589	cell-substrate adhesion	51/1121	363/18723	1.15494e-08	3.08479e-06	2.32436e-06	SFRP1/CCDC80/ITGBL1/AXL/VEGFA/CORO1C/NTNG2/SRCIN1/SERPINE1/JUP/BCL2L11/ITGA5/MAP4K4/CSF1/NF2/ITGB5/FLNA/PARVA/SMAD6/THBS1/KDR/SMAD3/BCL6/BCAM/NRP1/FOXF1/MMP14/NDNF/JAG1/KIF14/PREX1/MDK/FER/EFNA1/ID1/IQGAP1/THY1/GBP1/LRP1/EFEMP2/PTN/FBLN2/PTPN11/RAC3/THBS3/VCL/LIMCH1/RELL2/RRAS/MSLN/UTRN	51
BP	GO:0007051	spindle organization	33/1121	184/18723	1.30873e-08	3.33666e-06	2.51414e-06	PLK1/TPX2/EZR/KIF4A/KPNB1/MYH9/RCC1/AURKA/HNRNPU/MAPRE3/DLGAP5/INCENP/KIF11/FLNA/CDC20/CENPE/KIF23/TUBB/NEK2/KIFC1/SPAG5/SPC25/ESPL1/TUBG2/MAP4/CKAP5/KIF3B/LZTS2/SMC1A/TACC1/STAG1/ASPM/GOLGA8A	33
BP	GO:0002831	regulation of response to biotic stimulus	47/1121	327/18723	2.11747e-08	5.16387e-06	3.89092e-06	DDX58/OAS1/HSP90AB1/IFIT1/APOBEC3F/HSPD1/HERC5/USP18/SFPQ/APOBEC3G/NLRC5/PLSCR1/OASL/HLA-E/STAT1/HLA-B/LGALS9/HSP90AA1/DHX9/HLA-F/DHX58/CLEC7A/DRD2/NMI/ISG15/IFI35/TXK/HLA-A/DUSP10/PARP14/TRIB1/NECTIN2/ARG2/TRIM21/PTPN11/CCL5/MAVS/WNT5A/DDX60/PRKDC/POLR3B/SELENOK/TRIM5/IL23A/IFNB1/LY96/CARD16	47
BP	GO:0032103	positive regulation of response to external stimulus	56/1121	427/18723	2.65233e-08	6.19871e-06	4.67065e-06	HSPD1/VEGFA/SFPQ/NLRC5/PLSCR1/SERPINE1/OASL/HLA-E/LGALS9/HSP90AA1/DHX9/CSF1/HLA-F/FLNA/NEAT1/DHX58/THBS1/CLEC7A/KDR/SMAD3/NUPR1/NMI/EDN1/SLIT2/IFI35/LDLR/TXK/NRP1/NINJ1/MDK/ETS1/NECTIN2/LRP1/MET/S1PR1/PTN/CCL5/MAVS/WNT5A/SCG2/CCL26/ZNF580/DDX60/CXCL8/PRKDC/CXCL10/POLR3B/EGFR/TRIM5/IL23A/S100A7/IFNB1/LY96/FKBP1B/TMSB4X/CEBPB	56
BP	GO:0098813	nuclear chromosome segregation	42/1121	281/18723	3.86392e-08	8.66908e-06	6.53205e-06	PLK1/BUB1B/KIF4A/DUSP1/CDCA5/SFPQ/NCAPD2/SPDL1/KPNB1/SGO2/NCAPH/FAM83D/HNRNPU/DLGAP5/INCENP/KIF18B/CDC20/NCAPG/CENPE/KIF23/NEK2/KIFC1/SPAG5/NCAPG2/ESPL1/CDCA8/SMC2/CENPF/TUBG2/BUB1/KIF14/STAG3L2/KNL1/ECT2/SMC4/P3H4/SMC1A/CHAMP1/NDC1/STAG1/ESCO1/CDC26	42
BP	GO:0009612	response to mechanical stimulus	35/1121	216/18723	6.93058e-08	1.49514e-05	1.12657e-05	TXNIP/FOSB/FOS/SERPINE2/JUP/STAT1/BTG2/TGFBR2/SLC1A3/SOST/THBS1/PPL/DRD2/EDN1/PDZD7/FOSL1/WHRN/PIEZO1/MMP14/JUN/CASP1/GSN/MDK/NFKB1/AQP1/ETS1/ARHGDIA/PTN/PTPN11/JUND/CXCL10/EGFR/IGFBP2/ENDOG/UCN	35
BP	GO:0010810	regulation of cell-substrate adhesion	35/1121	221/18723	1.23864e-07	2.57316e-05	1.93885e-05	SFRP1/CCDC80/VEGFA/CORO1C/SERPINE1/JUP/MAP4K4/CSF1/NF2/FLNA/THBS1/KDR/SMAD3/BCL6/NRP1/FOXF1/MMP14/NDNF/JAG1/PREX1/MDK/IQGAP1/THY1/GBP1/LRP1/EFEMP2/PTN/FBLN2/PTPN11/RAC3/VCL/LIMCH1/RELL2/RRAS/UTRN	35
BP	GO:0000302	response to reactive oxygen species	35/1121	222/18723	1.3876e-07	2.77966e-05	2.09444e-05	TXNIP/SESN2/FOS/DUSP1/HSPD1/ADA/TPM1/AXL/PINK1/AKR1C3/STAT1/KLF4/HIF1A/EDN1/FOSL1/RHOB/KDM6B/JUN/DHFR/FER/ECT2/AQP1/ETS1/KLF2/MET/GCH1/PTPN11/MAP1LC3A/ZNF580/EGFR/PRDX5/S100A7/ENDOG/FKBP1B/ROMO1	35
BP	GO:1902850	microtubule cytoskeleton organization involved in mitosis	27/1121	147/18723	1.62829e-07	3.07661e-05	2.31819e-05	PLK1/TPX2/KIF4A/SPDL1/KPNB1/RCC1/AURKA/HNRNPU/DLGAP5/KIF11/FLNA/CDC20/CENPE/KIF23/NEK2/KIFC1/SPC25/ESPL1/TUBG2/MAP4/SAPCD2/CKAP5/KIF3B/SMC1A/DYNLT1/TACC1/STAG1	27
BP	GO:1901654	response to ketone	32/1121	194/18723	1.64554e-07	3.07661e-05	2.31819e-05	TXNIP/FOSB/SFRP1/FOS/DUSP1/NEFL/CAV1/TYMS/AKR1C3/FBXO32/SREBF1/DDIT4/KLF4/CLDN4/CAD/THBS1/CDKN1A/EDN1/FOSL1/SLIT2/CCND1/AKR1B1/KLF9/CA9/ASS1/AQP1/AKR1C2/KLF2/PTN/TSPO/EGFR/ABHD2	32
BP	GO:0048545	response to steroid hormone	46/1121	339/18723	1.71e-07	3.094e-05	2.33129e-05	TXNIP/FOSB/SFRP1/FOS/DUSP1/NEFL/CAV1/HSPD1/TYMS/HMGA2/ZFP36L1/AKR1C3/FBXO32/SREBF1/BCL2L11/DDIT4/PAQR8/HNRNPU/NEDD4/TGFBR2/CLDN4/CAD/THBS1/PMEPA1/CDKN1A/EDN1/PLPP1/FOSL1/SLIT2/CCND1/S100B/KLF9/ASS1/BRCA1/ZFP36/ABCA2/MDK/AQP1/PTN/GPER1/TSPO/EGFR/ABHD2/IGFBP2/ADM/UCN	46
BP	GO:0051384	response to glucocorticoid	27/1121	148/18723	1.87991e-07	3.29512e-05	2.48284e-05	FOSB/FOS/DUSP1/NEFL/HSPD1/TYMS/ZFP36L1/FBXO32/BCL2L11/DDIT4/HNRNPU/CAD/CDKN1A/EDN1/FOSL1/SLIT2/CCND1/S100B/KLF9/ASS1/ZFP36/MDK/AQP1/EGFR/IGFBP2/ADM/UCN	27
BP	GO:0031960	response to corticosteroid	29/1121	167/18723	2.01682e-07	3.42798e-05	2.58294e-05	FOSB/FOS/DUSP1/NEFL/HSPD1/TYMS/ZFP36L1/AKR1C3/FBXO32/BCL2L11/DDIT4/HNRNPU/CAD/CDKN1A/EDN1/FOSL1/SLIT2/CCND1/S100B/KLF9/ASS1/ZFP36/MDK/AQP1/GPER1/EGFR/IGFBP2/ADM/UCN	29
BP	GO:0010811	positive regulation of cell-substrate adhesion	24/1121	123/18723	2.45053e-07	4.04265e-05	3.04609e-05	SFRP1/CCDC80/VEGFA/JUP/MAP4K4/CSF1/FLNA/KDR/SMAD3/NRP1/FOXF1/NDNF/PREX1/MDK/IQGAP1/THY1/EFEMP2/PTN/FBLN2/PTPN11/RAC3/RELL2/RRAS/UTRN	24
BP	GO:0034341	response to interferon-gamma	26/1121	141/18723	2.53431e-07	4.06142e-05	3.06023e-05	IFITM1/SP100/HSP90AB1/GBP2/NLRC5/STAT1/LGALS9/CCL2/IFITM3/BST2/NMI/EDN1/TXK/ASS1/CASP1/PARP14/GBP1/VIM/GCH1/TRIM21/IFITM2/CCL5/FLNB/WNT5A/CCL26/CXCL16	26
BP	GO:0031099	regeneration	32/1121	198/18723	2.65764e-07	4.14074e-05	3.12e-05	LGR6/NEFL/CCNA2/AXL/TYMS/PNPT1/KLF4/AURKA/TGFBR2/MAP4K4/CAD/FLNA/CDKN1A/TXK/CCND1/LARGE1/NINJ1/DHFR/DUSP10/MDK/CPQ/THY1/SOX2/LRP1/CPT1A/PTN/GAP43/TSPO/EGFR/ADM/FKBP1B/CEBPB	32
BP	GO:0051225	spindle assembly	23/1121	117/18723	3.77543e-07	5.72334e-05	4.31247e-05	PLK1/TPX2/KIF4A/KPNB1/RCC1/AURKA/HNRNPU/MAPRE3/INCENP/KIF11/FLNA/CDC20/KIF23/TUBB/NEK2/KIFC1/SPAG5/KIF3B/LZTS2/SMC1A/STAG1/ASPM/GOLGA8A	23
BP	GO:0000280	nuclear division	54/1121	439/18723	3.88213e-07	5.73023e-05	4.31766e-05	PLK1/TPX2/BUB1B/KIF4A/DUSP1/ANLN/CDCA5/NCAPD2/SPDL1/KPNB1/BCL2L11/SGO2/CDCA2/NCAPH/RCC1/AURKA/HNRNPU/DLGAP5/INCENP/KIF11/KIF18B/FLNA/CDC20/NCAPG/CENPE/KIF23/NEK2/KIFC1/EDN1/SPAG5/NCAPG2/ESPL1/CDCA8/LIF/SMC2/CENPF/EPS8/TUBG2/BUB1/KIF14/SMC4/P3H4/KIF3B/MKI67/OBSL1/SMC1A/CHAMP1/NDC1/WNT5A/KIF20B/MSX1/STAG1/ASPM/CDC26	54
BP	GO:0048285	organelle fission	58/1121	488/18723	4.61142e-07	6.63217e-05	4.99726e-05	PLK1/TPX2/BUB1B/KIF4A/DUSP1/ANLN/CDCA5/CORO1C/PINK1/NCAPD2/SPDL1/KPNB1/BCL2L11/SGO2/CDCA2/NCAPH/RCC1/AURKA/HNRNPU/DLGAP5/INCENP/KIF11/KIF18B/FLNA/CDC20/NCAPG/CENPE/KIF23/KDR/NEK2/KIFC1/EDN1/SPAG5/NCAPG2/ESPL1/CDCA8/LIF/SMC2/CENPF/EPS8/TUBG2/BUB1/KIF14/SMC4/P3H4/KIF3B/MKI67/OBSL1/SMC1A/CHAMP1/NDC1/WNT5A/KIF20B/MSX1/STAG1/ASPM/PEX11G/CDC26	58
BP	GO:0001952	regulation of cell-matrix adhesion	24/1121	128/18723	5.28733e-07	7.41416e-05	5.58648e-05	SFRP1/VEGFA/CORO1C/SERPINE1/JUP/MAP4K4/CSF1/NF2/THBS1/KDR/SMAD3/BCL6/NRP1/MMP14/JAG1/IQGAP1/THY1/LRP1/EFEMP2/PTPN11/VCL/LIMCH1/RRAS/UTRN	24
BP	GO:0007052	mitotic spindle organization	23/1121	120/18723	6.05265e-07	8.28031e-05	6.23912e-05	PLK1/TPX2/KIF4A/KPNB1/RCC1/AURKA/HNRNPU/DLGAP5/KIF11/FLNA/CDC20/CENPE/KIF23/NEK2/KIFC1/SPC25/TUBG2/MAP4/CKAP5/KIF3B/SMC1A/TACC1/STAG1	23
BP	GO:0060485	mesenchyme development	40/1121	291/18723	7.70753e-07	0.000102932	7.75582e-05	RANBP3L/SFRP1/CORO1C/HMGA2/ZFP36L1/STAT1/GBX2/FAM83D/TGFBR2/SEMA6A/FLNA/HIF1A/S100A4/RFLNB/MYC/NRG1/SMAD3/EDN1/EFNB1/SEMA6B/CRELD1/NRP1/FOXF1/TBX3/SEMA3B/JAG1/TRIM28/MDK/EFNA1/MESP1/NRTN/LOXL3/SIX4/ZNF703/BNC2/WNT5A/MSX1/NOLC1/DLL3/BAMBI	40
BP	GO:0032570	response to progesterone	12/1121	37/18723	9.15981e-07	0.000119482	9.00285e-05	TXNIP/FOSB/FOS/CAV1/TYMS/SREBF1/CLDN4/THBS1/FOSL1/PTN/TSPO/ABHD2	12
BP	GO:0007346	regulation of mitotic cell cycle	54/1121	457/18723	1.37154e-06	0.000174841	0.00013174	PLK1/BUB1B/DUSP1/ANLN/CDCA5/SOX4/HMGA2/ZFP36L1/ID2/SPDL1/BTG2/KLF4/CDCA2/GTSE1/RCC1/AURKA/HNRNPU/DLGAP5/NACC2/CCL2/EIF4G1/CENPE/NEK2/CDKN1A/SMAD3/BCL6/EDN1/TICRR/ESPL1/USP22/CCND1/PSME1/CENPF/BRCA1/BUB1/KIF14/ZNF655/IQGAP1/MKI67/BRSK1/SMARCD3/CLSPN/OBSL1/PTPN11/RBL1/CDKN1C/MDC1/KIF20B/PRKDC/BRCC3/EGFR/PIM3/PSME2/CDC26	54
BP	GO:0022407	regulation of cell-cell adhesion	53/1121	448/18723	1.65463e-06	0.000203398	0.000153258	C1QTNF1/SERPINE2/CAV1/HSPD1/ADA/SOX4/VEGFA/B2M/HLA-E/IL7R/IRAK1/KLF4/LGALS9/NRARP/TGFBR2/NF2/CCL2/ANK3/PELI1/BCL6/LGALS3/ZBTB7B/EFNB1/PIEZO1/MALT1/HLA-A/ASS1/EFNB3/JAG1/TFRC/DUSP10/MDK/ETS1/LOXL3/THY1/SOX2/ARG2/PTPN11/ZNF703/CCL5/CD70/WNT5A/KIF26B/TENM3/SLC7A1/CELSR2/SELENOK/EGR3/IL23A/IFNB1/IGFBP2/CEBPB/LGALS7B	53
BP	GO:0140694	non-membrane-bounded organelle assembly	46/1121	367/18723	1.66809e-06	0.000203398	0.000153258	PLK1/TPX2/EZR/KIF4A/CSRP1/ANLN/TPM1/DHX37/KPNB1/TMOD1/RCC1/AURKA/HNRNPU/RPLP0P6/MAPRE3/DLGAP5/INCENP/KIF11/FLNA/CDC20/SQLE/CENPE/KIF23/TUBB/NEK2/KIFC1/EDN1/SPAG5/CENPN/CENPF/BRCA1/RPLP0/GSN/KIF3B/SIX4/KRT8/LZTS2/OBSL1/SMC1A/TNNT1/STAG1/CSRP2/ASPM/PRKDC/NOCT/GOLGA8A	46
BP	GO:0007159	leukocyte cell-cell adhesion	46/1121	371/18723	2.25013e-06	0.000268531	0.000202335	EZR/CAV1/HSPD1/ADA/SOX4/B2M/HLA-E/IL7R/NT5E/IRAK1/KLF4/LGALS9/NRARP/TGFBR2/CCL2/PELI1/JAM2/BCL6/LGALS3/ZBTB7B/EFNB1/MALT1/HLA-A/ASS1/EFNB3/CERCAM/ADD2/TFRC/DUSP10/MDK/GCNT1/ETS1/LOXL3/THY1/ARG2/PTPN11/CCL5/CD70/SLC7A1/SELENOK/EGR3/IL23A/IFNB1/IGFBP2/CEBPB/LGALS7B	46
BP	GO:0045088	regulation of innate immune response	32/1121	218/18723	2.34602e-06	0.000274142	0.000206563	OAS1/HSP90AB1/USP18/SFPQ/NLRC5/PLSCR1/HLA-E/HLA-B/LGALS9/HSP90AA1/DHX9/HLA-F/DHX58/CLEC7A/DRD2/NMI/ISG15/IFI35/TXK/HLA-A/DUSP10/PARP14/NECTIN2/TRIM21/PTPN11/CCL5/MAVS/WNT5A/PRKDC/POLR3B/TRIM5/IFNB1	32
BP	GO:0019885	antigen processing and presentation of endogenous peptide antigen via MHC class I	8/1121	17/18723	2.40823e-06	0.000275669	0.000207713	TAP1/B2M/HLA-E/HLA-B/HLA-F/HLA-C/HLA-A/HLA-H	8
BP	GO:0010975	regulation of neuron projection development	52/1121	445/18723	2.98049e-06	0.000332119	0.000250247	SFRP1/SDC2/NEFL/VEGFA/NTNG2/B2M/SRCIN1/CNTN1/LZTS3/TRIM46/ARSB/KLF4/GPC2/PLXNB3/LPAR1/NEGR1/NEDD4/MAP4K4/SEMA6A/RAB17/FLNA/CDC20/CDH4/SLIT2/SEMA6B/NRP1/ENC1/SEMA3B/NDNF/EFNB3/EIF4G2/PREX1/MDK/EFNA1/ID1/PPP2R5B/IQGAP1/THY1/ABL2/LRP1/VIM/BRSK1/PTN/RGS2/OBSL1/EFNB2/DYNLT1/WNT5A/TENM3/TSKU/FKBP1B/CRABP2	52
BP	GO:0001666	response to hypoxia	40/1121	307/18723	3.0198e-06	0.000332119	0.000250247	EGR1/ATP1B1/SFRP1/AHCY/CAV1/HSPD1/CCNA2/ADA/VEGFA/KCNMA1/PINK1/PLOD2/ZFP36L1/IRAK1/DDIT4/AGTRAP/TGFBR2/HIF1A/THBS1/MYC/DRD2/SMAD3/EDN1/S100B/MMP14/NDNF/CA9/AK4/CASP1/AQP1/ETS1/PTN/FAM162A/HIPK2/ADM/ENDOG/MALAT1/SIRT4/ANG/CARD16	40
BP	GO:0150116	regulation of cell-substrate junction organization	16/1121	71/18723	3.44844e-06	0.000371967	0.000280273	SFRP1/VEGFA/CORO1C/MAP4K4/THBS1/KDR/SMAD3/NRP1/MMP14/IQGAP1/THY1/LRP1/PTPN11/VCL/LIMCH1/LAMTOR2	16
BP	GO:0032496	response to lipopolysaccharide	43/1121	343/18723	3.59521e-06	0.000380481	0.000286688	FOS/HSPD1/AXL/CMPK2/SERPINE1/IRAK1/LGALS9/NR4A1/CCL2/AKAP12/SMAD6/PELI1/EDN1/MALT1/ASS1/JUN/ZFP36/PRPF8/PLSCR4/CASP1/DUSP10/FER/NFKB1/TRIB1/LOXL1/VIM/F2R/GCH1/KCNJ8/CCL5/WNT5A/TSPO/JUND/CXCL8/CXCL10/TRIM5/S100A7/ADM/ABCA1/LY96/NOCT/CEBPB/CARD16	43
BP	GO:0050673	epithelial cell proliferation	51/1121	437/18723	3.84296e-06	0.00039917	0.00030077	SFRP1/CAV1/VEGFA/IGFBP5/B2M/ZFP36L1/ID2/UHRF1/GLUL/STAT1/IQGAP3/PLXNB3/NRARP/IGFBP4/NR4A1/WDR77/CCL2/HIF1A/THBS1/MYC/KDR/SMAD3/NUPR1/CCND1/NRP1/MMP14/KLF9/SFN/ZFP36/DUSP10/MDK/OSR2/ID1/ATOH8/SOX2/SIX4/PTN/ZNF703/WNT5A/CDKN1C/SCG2/CCL26/ZNF580/PRKDC/EGR3/EGFR/EGFL7/CD109/RIDA/CEBPB/ANG	51
BP	GO:0052372	modulation by symbiont of entry into host	13/1121	49/18723	4.11944e-06	0.000412294	0.000310659	IFITM1/TRIM22/CAV1/LY6E/LGALS9/IFITM3/GSN/HS3ST5/NECTIN2/TRIM21/IFITM2/CXCL8/TRIM5	13
BP	GO:0046888	negative regulation of hormone secretion	15/1121	64/18723	4.12664e-06	0.000412294	0.000310659	SFRP1/SREBF1/MAP4K4/DRD2/EDN1/LIF/NMB/PTPN11/VSNL1/IRS1/IL11/PIM3/FKBP1B/SIRT4/UCN	15
BP	GO:0043903	regulation of biological process involved in symbiotic interaction	16/1121	72/18723	4.18983e-06	0.000412294	0.000310659	IFITM1/TRIM22/CAV1/LY6E/LGALS9/IFITM3/PC/CHMP3/TRIM28/GSN/HS3ST5/NECTIN2/TRIM21/IFITM2/CXCL8/TRIM5	16
BP	GO:0030099	myeloid cell differentiation	46/1121	381/18723	4.63215e-06	0.000440368	0.000331812	PABPC4/SFRP1/FOS/BATF2/TMEM178A/VEGFA/B2M/ZFP36L1/OSTM1/ID2/STAT1/MYH9/THRA/TGFBR2/CSF1/JUNB/SLC25A5/HIF1A/MYC/DLL1/BCL6/ISG15/NCAPG2/P4HTM/LIF/RARG/EVI2B/JUN/ZFP36/JAG1/TCTA/TFRC/ETS1/BPGM/TRIB1/KLF2/PTPN11/ZNF385A/TCIRG1/PRKDC/IL11/HIPK2/CD109/IL23A/PRTN3/CEBPB	46
BP	GO:0050678	regulation of epithelial cell proliferation	46/1121	381/18723	4.63215e-06	0.000440368	0.000331812	SFRP1/CAV1/VEGFA/B2M/ZFP36L1/UHRF1/GLUL/STAT1/IQGAP3/PLXNB3/NRARP/NR4A1/WDR77/CCL2/HIF1A/THBS1/MYC/KDR/SMAD3/NUPR1/CCND1/NRP1/KLF9/SFN/ZFP36/DUSP10/MDK/OSR2/ID1/ATOH8/SOX2/SIX4/PTN/ZNF703/WNT5A/CDKN1C/SCG2/CCL26/ZNF580/PRKDC/EGR3/EGFR/EGFL7/CD109/RIDA/ANG	46
BP	GO:0052126	movement in host environment	27/1121	175/18723	5.51926e-06	0.000515959	0.000388769	IFITM1/TRIM22/CAV1/AXL/PLSCR1/LY6E/LGALS9/ITGA5/ITGB5/IFITM3/PC/CHMP3/LDLR/NRP1/EFNB3/TRIM28/TFRC/GSN/HS3ST5/NECTIN2/TRIM21/IFITM2/EFNB2/DYNLT1/CXCL8/EGFR/TRIM5	27
BP	GO:0042692	muscle cell differentiation	46/1121	384/18723	5.71193e-06	0.000525217	0.000395745	RCAN1/CTH/CSRP1/TPM1/VEGFA/GDF15/IGFBP5/ID2/PTBP1/TMOD1/MYH9/HNRNPU/SORBS2/DLL1/JAM2/NRG1/EDN1/ALPK2/PIEZO1/MYOF/FOXF1/MMP14/TBX3/KDM6B/NINJ1/PLD3/ADAMTS15/OLFM2/SPEG/MESP1/SIX4/EFEMP2/ADAM12/KRT8/SMARCD3/DNER/RGS2/OBSL1/EFNB2/GPER1/MSX1/TNNT1/CSRP2/CXCL10/ADM/MTLN	46
BP	GO:0001954	positive regulation of cell-matrix adhesion	14/1121	58/18723	5.94644e-06	0.000529422	0.000398913	SFRP1/VEGFA/JUP/MAP4K4/CSF1/KDR/SMAD3/NRP1/IQGAP1/THY1/EFEMP2/PTPN11/RRAS/UTRN	14
BP	GO:0032481	positive regulation of type I interferon production	14/1121	58/18723	5.94644e-06	0.000529422	0.000398913	DDX58/OAS1/HSPD1/IFIH1/IRAK1/STAT1/HSP90AA1/DHX9/OAS2/DHX58/ISG15/PTPN11/MAVS/POLR3B	14
BP	GO:0051893	regulation of focal adhesion assembly	15/1121	66/18723	6.20216e-06	0.000535199	0.000403266	SFRP1/VEGFA/CORO1C/MAP4K4/THBS1/KDR/SMAD3/NRP1/MMP14/IQGAP1/THY1/LRP1/PTPN11/VCL/LIMCH1	15
BP	GO:0090109	regulation of cell-substrate junction assembly	15/1121	66/18723	6.20216e-06	0.000535199	0.000403266	SFRP1/VEGFA/CORO1C/MAP4K4/THBS1/KDR/SMAD3/NRP1/MMP14/IQGAP1/THY1/LRP1/PTPN11/VCL/LIMCH1	15
BP	GO:0030879	mammary gland development	23/1121	137/18723	6.46604e-06	0.000549516	0.000414054	CAV1/VEGFA/IGFBP5/ELF3/ID2/IQGAP3/BCL2L11/TGFBR2/CSF1/CAD/HIF1A/OAS2/NRG1/ZBTB7B/CCND1/FOXF1/TBX3/ZNF703/WNT5A/MSX1/NEURL1/HOXD9/CEBPB	23
BP	GO:0002237	response to molecule of bacterial origin	44/1121	363/18723	6.70501e-06	0.000554429	0.000417756	FOS/HSPD1/AXL/CMPK2/B2M/SERPINE1/IRAK1/LGALS9/NR4A1/CCL2/AKAP12/SMAD6/PELI1/EDN1/MALT1/ASS1/JUN/ZFP36/PRPF8/PLSCR4/CASP1/DUSP10/FER/NFKB1/TRIB1/LOXL1/VIM/F2R/GCH1/KCNJ8/CCL5/WNT5A/TSPO/JUND/CXCL8/CXCL10/TRIM5/S100A7/ADM/ABCA1/LY96/NOCT/CEBPB/CARD16	44
BP	GO:0002483	antigen processing and presentation of endogenous peptide antigen	8/1121	19/18723	6.72155e-06	0.000554429	0.000417756	TAP1/B2M/HLA-E/HLA-B/HLA-F/HLA-C/HLA-A/HLA-H	8
BP	GO:0003018	vascular process in circulatory system	35/1121	263/18723	7.71653e-06	0.000627276	0.000472645	CAV1/VEGFA/KCNMA1/SLC16A2/SLC38A3/SLC29A4/GRIP2/SLC5A6/SLC27A1/SLC1A3/SLC6A6/AKAP12/SLC2A3/EDN1/SLIT2/SLC5A3/ABCA2/TJP3/TFRC/SLC6A9/LRP1/KLF2/CDH5/F2R/ADRA1D/GCH1/RGS2/KCNJ8/GPER1/SLC7A1/EGFR/ADRA1B/ADM/SLC29A2/UCN	35
BP	GO:0048511	rhythmic process	38/1121	298/18723	8.79169e-06	0.000701414	0.000528507	EGR1/HNRNPR/AHCY/PPP1CB/ID4/ADA/AXL/TYMS/MYBBP1A/SFPQ/ARNTL2/ID2/SREBF1/HNRNPU/DHX9/CLDN4/AFP/EGR2/DRD2/HES7/SLIT2/KLF9/ASS1/JUN/NAGLU/MDK/ATF4/ID1/ETS1/DBP/ID3/ATF5/PTN/JUND/PRKDC/EGR3/EGFR/NOCT	38
BP	GO:1903706	regulation of hemopoiesis	44/1121	367/18723	8.87866e-06	0.000701414	0.000528507	SFRP1/FOS/ADA/SOX4/AXL/TMEM178A/B2M/ZFP36L1/ID2/IL7R/STAT1/HLA-B/LGALS9/NRARP/TGFBR2/CSF1/HIF1A/MYC/DLL1/BCL6/ISG15/ZBTB7B/P4HTM/LIF/RARG/MMP14/MALT1/EVI2B/JUN/ZFP36/JAG1/TCTA/DUSP10/MDK/ETS1/LOXL3/TRIB1/PTN/PRDM1/PRKDC/EGR3/IL23A/IFNB1/CEBPB	44
BP	GO:0048568	embryonic organ development	49/1121	427/18723	9.40469e-06	0.000732651	0.000552044	ADA/EFEMP1/VEGFA/ZFP36L1/ID2/GBX2/TGFBR2/TEAD3/JUNB/E2F8/HIF1A/DLL1/KDR/ALDH1A3/SMAD3/EDN1/PDZD7/MYCN/WHRN/MTHFD1/LIF/RARG/FOXF1/MMP14/TBX3/VANGL2/NAGLU/TFEB/TRIM28/OSR2/EFNA1/ATF4/MESP1/ID3/SIX4/LRIG1/MTHFD1L/KRT8/WNT5A/PRDM1/MSX1/CXCL8/NKX3-2/HOXB2/HIPK2/HOXD9/TUBB2B/ADM/CEBPB	49
BP	GO:0036293	response to decreased oxygen levels	40/1121	322/18723	9.70303e-06	0.000745539	0.000561755	EGR1/ATP1B1/SFRP1/AHCY/CAV1/HSPD1/CCNA2/ADA/VEGFA/KCNMA1/PINK1/PLOD2/ZFP36L1/IRAK1/DDIT4/AGTRAP/TGFBR2/HIF1A/THBS1/MYC/DRD2/SMAD3/EDN1/S100B/MMP14/NDNF/CA9/AK4/CASP1/AQP1/ETS1/PTN/FAM162A/HIPK2/ADM/ENDOG/MALAT1/SIRT4/ANG/CARD16	40
BP	GO:0050921	positive regulation of chemotaxis	23/1121	141/18723	1.05706e-05	0.000801225	0.000603714	VEGFA/SERPINE1/LGALS9/CSF1/THBS1/KDR/SMAD3/EDN1/SLIT2/NRP1/MDK/MET/S1PR1/PTN/CCL5/WNT5A/SCG2/CCL26/ZNF580/CXCL8/CXCL10/S100A7/TMSB4X	23
BP	GO:0044409	entry into host	24/1121	151/18723	1.07886e-05	0.000805468	0.000606911	IFITM1/TRIM22/CAV1/AXL/PLSCR1/LY6E/LGALS9/ITGA5/ITGB5/IFITM3/LDLR/NRP1/EFNB3/TFRC/GSN/HS3ST5/NECTIN2/TRIM21/IFITM2/EFNB2/DYNLT1/CXCL8/EGFR/TRIM5	24
BP	GO:0035456	response to interferon-beta	10/1121	32/18723	1.09138e-05	0.000805468	0.000606911	IFITM1/OAS1/PLSCR1/STAT1/PNPT1/IFITM3/BST2/XAF1/IFITM2/IFNB1	10
BP	GO:0044403	biological process involved in symbiotic interaction	37/1121	290/18723	1.13511e-05	0.000826859	0.000623028	IFITM1/HSP90AB1/TRIM22/IFIT1/CAV1/HSPA8/HSPD1/AXL/HMGA2/PLSCR1/LY6E/LGALS9/ITGA5/ITGB5/IFITM3/PC/CHMP3/LDLR/NRP1/EFNB3/IFI27/JUN/TRIM28/TFRC/GSN/HS3ST5/APOL1/NECTIN2/TRIM21/IFITM2/EFNB2/CCL5/DYNLT1/CXCL8/EGFR/TRIM5/ROMO1	37
BP	GO:0032728	positive regulation of interferon-beta production	11/1121	39/18723	1.19517e-05	0.000847259	0.0006384	DDX58/OAS1/IFIH1/HSP90AA1/DHX9/OAS2/DHX58/ISG15/PTPN11/MAVS/POLR3B	11
BP	GO:0051960	regulation of nervous system development	50/1121	443/18723	1.20567e-05	0.000847259	0.0006384	SERPINE2/NEFL/VEGFA/B2M/TRIM46/ID2/GBX2/PLXNB3/SEMA6A/CLSTN3/NF2/NLGN2/HIF1A/CDH4/DLL1/EGR2/JAM2/DRD2/HES7/SLIT2/LDLR/MYCN/S100B/AMIGO2/SEMA6B/LIF/NRP1/RARG/SEMA3B/EFNB3/EIF4G2/LGI4/KIF14/DUSP10/MDK/ID1/THY1/LRP1/SMARCD3/PTN/OBSL1/GPER1/DYNLT1/WNT5A/TSPO/ASPM/NEURL1/EGFR/CRABP2/DLL3	50
BP	GO:0060759	regulation of response to cytokine stimulus	25/1121	162/18723	1.20843e-05	0.000847259	0.0006384	DDX58/OAS1/HSP90AB1/CAV1/AXL/USP18/NLRC5/IFIH1/IRAK1/KLF4/DHX9/CSF1/HIF1A/EDN1/ISG15/SLIT2/TXK/CASP1/PARP14/PTPN11/CCL5/MAVS/WNT5A/RNF113A/CARD16	25
BP	GO:0048762	mesenchymal cell differentiation	32/1121	236/18723	1.27118e-05	0.00088025	0.000663258	RANBP3L/SFRP1/CORO1C/HMGA2/STAT1/GBX2/FAM83D/TGFBR2/SEMA6A/FLNA/HIF1A/S100A4/RFLNB/NRG1/SMAD3/EDN1/EFNB1/SEMA6B/NRP1/TBX3/SEMA3B/JAG1/TRIM28/MDK/EFNA1/NRTN/LOXL3/ZNF703/WNT5A/MSX1/NOLC1/BAMBI	32
BP	GO:0001503	ossification	47/1121	408/18723	1.28723e-05	0.000880497	0.000663444	IFITM1/RANBP3L/SFRP1/TOB1/MYBBP1A/IGFBP5/NOTUM/THRA/HNRNPU/DHX9/MRC2/CSF1/JUNB/SOST/HIF1A/RFLNB/COL6A1/SMAD6/EGR2/CRIM1/SMAD3/ISG15/MMP14/SNRNP200/JAG1/ACHE/MDK/OSR2/ATF4/SOX2/ID3/VCAN/S1PR1/PTN/PTPN11/THBS3/WNT5A/DHRS3/TCIRG1/JUND/KAZALD1/EGFR/NAB2/FBXL15/NOCT/CEBPB/BAMBI	47
BP	GO:0070997	neuron death	43/1121	361/18723	1.31548e-05	0.000888982	0.000669837	EGR1/UNC5B/FAIM2/HSP90AB1/FOS/NEFL/HSPD1/AXL/PINK1/BTG2/BCL2L11/DDIT4/CSF1/AGAP2/TOX3/CCL2/HLA-F/HIF1A/EIF4G1/NUPR1/NRP1/NDNF/NLRP1/JUN/SLC7A11/KIF14/MDK/ATF4/SIX4/LRP1/F2R/CIT/EFNB2/CCL5/WNT5A/SNCG/FAM162A/HIPK2/IKBKG/GPR75/ENDOG/CEBPB/UCN	43
BP	GO:0045786	negative regulation of cell cycle	45/1121	385/18723	1.35492e-05	0.000904729	0.000681703	PLK1/BUB1B/DUSP1/SOX4/IPO5/HMGA2/ZFP36L1/SPDL1/BTG2/KLF4/GTSE1/NR4A1/CAMK2N1/NACC2/CCL2/E2F8/NEK2/CDKN1A/SMAD3/BCL6/NUPR1/TICRR/ESPL1/CCND1/LIF/RHOB/CENPF/BRCA1/BUB1/ZNF655/PPP2R5B/CCNF/BRSK1/CLSPN/ATF5/PTPN11/RBL1/GPER1/CDKN1C/MDC1/IPO7/PRKDC/BRCC3/EGFR/FBXO6	45
BP	GO:0007517	muscle organ development	40/1121	327/18723	1.40018e-05	0.000923953	0.000696188	RCAN1/EGR1/FOS/CAV1/TPM1/BTG2/LY6E/SMTN/FGFRL1/NR4A1/HIVEP3/ATF3/DLL1/MRAS/EGR2/NRG1/SMAD3/NUPR1/S100B/IGSF8/LARGE1/SVIL/LIF/ASS1/CENPF/PKP2/SPEG/ID3/SIX4/EFEMP2/DNER/S1PR1/FLNB/WNT5A/MSX1/CXCL10/NEURL1/EGR3/HOXD9/UTRN	40
BP	GO:0002683	negative regulation of immune system process	49/1121	434/18723	1.45732e-05	0.000950475	0.000716172	OAS1/EZR/SFRP1/DUSP1/ADA/AXL/TMEM178A/USP18/NLRC5/ID2/HLA-E/IL7R/HLA-B/LGALS9/NRARP/CCL2/HLA-F/DHX58/THBS1/PELI1/MYC/DRD2/BCL6/BST2/NMI/LGALS3/ISG15/ZBTB7B/SLIT2/LDLR/FOXF1/TSC22D3/HLA-A/TCTA/DUSP10/MDK/FER/PARP14/LOXL3/TRIB1/THY1/GBP1/ARG2/TRIM21/GPER1/PRKDC/IFNB1/CEBPB/LGALS7B	49
BP	GO:0046718	viral entry into host cell	23/1121	144/18723	1.50641e-05	0.000971205	0.000731791	IFITM1/TRIM22/CAV1/AXL/PLSCR1/LY6E/LGALS9/ITGA5/ITGB5/IFITM3/LDLR/NRP1/EFNB3/TFRC/GSN/HS3ST5/NECTIN2/TRIM21/IFITM2/EFNB2/DYNLT1/EGFR/TRIM5	23
BP	GO:0000281	mitotic cytokinesis	15/1121	71/18723	1.59516e-05	0.00100531	0.000757487	KIF20A/PLK1/KIF4A/ANLN/INCENP/CKAP2/KIF23/ANK3/CHMP3/ESPL1/RHOB/ECT2/CIT/LZTS2/KIF20B	15
BP	GO:0045824	negative regulation of innate immune response	15/1121	71/18723	1.59516e-05	0.00100531	0.000757487	OAS1/USP18/NLRC5/HLA-E/HLA-B/LGALS9/HLA-F/DHX58/DRD2/NMI/ISG15/HLA-A/DUSP10/PARP14/TRIM21	15
BP	GO:0035455	response to interferon-alpha	8/1121	21/18723	1.62481e-05	0.00100957	0.000760702	IFITM1/IFIT3/MX2/IFIT2/AXL/IFITM3/BST2/IFITM2	8
BP	GO:0044772	mitotic cell cycle phase transition	48/1121	424/18723	1.65592e-05	0.00100957	0.000760702	KHDRBS1/PLK1/BUB1B/DUSP1/ANLN/CDCA5/CCNA2/SOX4/FOXM1/HMGA2/ZFP36L1/ID2/SPDL1/IQGAP3/KLF4/GTSE1/RCC1/TPD52L1/AURKA/DLGAP5/NACC2/CCL2/EIF4G1/CENPE/CDKN1A/TICRR/ESPL1/CCND1/CUL4B/CDK18/PSME1/CENPF/EPS8/BRCA1/BUB1/KIF14/ZNF655/CCNF/BRSK1/SMARCD3/CLSPN/RBL1/PRKDC/BRCC3/EGFR/PSME2/FBXL15/CDC26	48
BP	GO:0048608	reproductive structure development	48/1121	424/18723	1.65592e-05	0.00100957	0.000760702	SFRP1/HSP90AB1/SERPINE2/TNFSF10/RRM1/ADA/AXL/VEGFA/DHX37/ZFP36L1/AKR1C3/BCL2L11/WDR77/JUNB/E2F8/FLNA/HIF1A/HMGCS1/RHOBTB3/EPOR/AFP/NUPR1/FOSL1/SLIT2/SERPINA5/CCND1/LIF/RARG/MMP14/TBX3/ETNK2/TFEB/TRIM28/COL9A3/SMARCC1/SIX4/CCNF/TPPP3/KRT8/PTN/PTPN11/WNT5A/PRDM1/ASPM/BIK/ADM/CEBPB/ANG	48
BP	GO:0034614	cellular response to reactive oxygen species	24/1121	155/18723	1.69321e-05	0.00102121	0.000769469	FOS/TPM1/AXL/PINK1/AKR1C3/KLF4/RHOB/KDM6B/JUN/DHFR/FER/ECT2/AQP1/ETS1/KLF2/MET/GCH1/PTPN11/MAP1LC3A/ZNF580/EGFR/PRDX5/ENDOG/ROMO1	24
BP	GO:1901214	regulation of neuron death	39/1121	319/18723	1.80827e-05	0.001079	0.000813011	EGR1/UNC5B/FAIM2/HSP90AB1/FOS/NEFL/HSPD1/AXL/PINK1/BTG2/BCL2L11/DDIT4/CSF1/AGAP2/TOX3/CCL2/HLA-F/HIF1A/EIF4G1/NUPR1/NRP1/NDNF/JUN/SLC7A11/KIF14/MDK/ATF4/SIX4/LRP1/F2R/EFNB2/CCL5/WNT5A/SNCG/HIPK2/IKBKG/GPR75/CEBPB/UCN	39
BP	GO:0042110	T cell activation	53/1121	487/18723	1.86437e-05	0.00110076	0.000829412	EGR1/CAV1/HSPD1/ADA/SOX4/CTPS1/B2M/ZFP36L1/HLA-E/IL7R/MYH9/LGALS9/NRARP/TGFBR2/RSAD2/BCL3/CCL2/CLEC7A/PELI1/SMAD3/BCL6/BTN3A1/LGALS3/ZBTB7B/EFNB1/MALT1/HLA-A/EFNB3/TFRC/DUSP10/GSN/PREX1/MDK/LOXL3/THY1/ARG2/ENTPD7/PTPN11/CCL5/CD70/TCIRG1/PRDM1/PRKDC/SLC7A1/SELENOK/EGR3/IL23A/IFNB1/IGFBP2/FKBP1B/PSMB10/CEBPB/LGALS7B	53
BP	GO:0070232	regulation of T cell apoptotic process	10/1121	34/18723	1.98775e-05	0.00113593	0.000855907	ADA/IL7R/LGALS9/HIF1A/LGALS3/TSC22D3/EFNA1/ARG2/CCL5/WNT5A	10
BP	GO:0061458	reproductive system development	48/1121	427/18723	1.99111e-05	0.00113593	0.000855907	SFRP1/HSP90AB1/SERPINE2/TNFSF10/RRM1/ADA/AXL/VEGFA/DHX37/ZFP36L1/AKR1C3/BCL2L11/WDR77/JUNB/E2F8/FLNA/HIF1A/HMGCS1/RHOBTB3/EPOR/AFP/NUPR1/FOSL1/SLIT2/SERPINA5/CCND1/LIF/RARG/MMP14/TBX3/ETNK2/TFEB/TRIM28/COL9A3/SMARCC1/SIX4/CCNF/TPPP3/KRT8/PTN/PTPN11/WNT5A/PRDM1/ASPM/BIK/ADM/CEBPB/ANG	48
BP	GO:0051302	regulation of cell division	26/1121	177/18723	1.9961e-05	0.00113593	0.000855907	TXNIP/KIF20A/PLK1/VEGFA/AURKA/INCENP/KIF18B/E2F8/KIF23/MYC/DLL1/DRD2/CHMP3/MLLT3/SVIL/SFN/EVI2B/KIF14/MDK/ECT2/KIF3B/CIT/PTN/RBL1/KIF20B/ASPM	26
BP	GO:0060537	muscle tissue development	46/1121	403/18723	2.00493e-05	0.00113593	0.000855907	RCAN1/EGR1/FOS/CSRP1/CAV1/TPM1/VEGFA/ZFAND5/IGFBP5/ID2/BTG2/LY6E/HNRNPU/TGFBR2/NR4A1/HIVEP3/SORBS2/ATF3/DLL1/EGR2/NRG1/SMAD3/NUPR1/EDN1/ALPK2/S100B/IGSF8/SVIL/TBX3/KDM6B/CENPF/PKP2/MESP1/SIX4/EFEMP2/DNER/S1PR1/RGS2/OBSL1/EFNB2/FLNB/WNT5A/MSX1/CSRP2/NEURL1/HOXD9	46
BP	GO:1903531	negative regulation of secretion by cell	23/1121	147/18723	2.12177e-05	0.0011901	0.000896729	SFRP1/SRCIN1/SREBF1/ASIC1/LGALS9/MAP4K4/RSAD2/HLA-F/DRD2/EDN1/LIF/FOXF1/CBARP/NMB/F2R/PTPN11/VSNL1/IRS1/IL11/PIM3/FKBP1B/SIRT4/UCN	23
BP	GO:1901990	regulation of mitotic cell cycle phase transition	37/1121	299/18723	2.25195e-05	0.00124128	0.000935286	PLK1/BUB1B/DUSP1/ANLN/CDCA5/SOX4/HMGA2/ZFP36L1/ID2/SPDL1/KLF4/GTSE1/AURKA/DLGAP5/NACC2/CCL2/EIF4G1/CENPE/CDKN1A/TICRR/ESPL1/CCND1/PSME1/CENPF/BRCA1/BUB1/KIF14/ZNF655/BRSK1/SMARCD3/CLSPN/RBL1/PRKDC/BRCC3/EGFR/PSME2/CDC26	37
BP	GO:0007623	circadian rhythm	29/1121	210/18723	2.25727e-05	0.00124128	0.000935286	EGR1/HNRNPR/AHCY/PPP1CB/ID4/ADA/TYMS/MYBBP1A/SFPQ/ARNTL2/ID2/SREBF1/HNRNPU/CLDN4/DRD2/KLF9/ASS1/JUN/NAGLU/ATF4/ID1/DBP/ID3/ATF5/JUND/PRKDC/EGR3/EGFR/NOCT	29
BP	GO:0051894	positive regulation of focal adhesion assembly	9/1121	28/18723	2.34422e-05	0.00127423	0.000960116	SFRP1/VEGFA/MAP4K4/KDR/SMAD3/NRP1/IQGAP1/THY1/PTPN11	9
BP	GO:0090307	mitotic spindle assembly	14/1121	65/18723	2.41441e-05	0.00127423	0.000960116	PLK1/TPX2/KIF4A/KPNB1/HNRNPU/KIF11/FLNA/CDC20/KIF23/NEK2/KIFC1/KIF3B/SMC1A/STAG1	14
BP	GO:0071359	cellular response to dsRNA	8/1121	22/18723	2.4195e-05	0.00127423	0.000960116	DDX58/IFIT1/CAV1/IFIH1/DHX9/NFKB1/MAVS/IFNB1	8
BP	GO:0001819	positive regulation of cytokine production	51/1121	467/18723	2.43078e-05	0.00127423	0.000960116	EGR1/DDX58/OAS1/BTN3A2/HSPD1/B2M/SERPINE1/HLA-E/IFIH1/IRAK1/STAT1/LGALS9/HSP90AA1/DHX9/RSAD2/BCL3/HLA-F/HIF1A/OAS2/DHX58/AKAP12/THBS1/CLEC7A/PELI1/DRD2/SMAD3/BTN3A1/ISG15/ZBTB7B/TXK/MALT1/HLA-A/NLRP1/BRCA1/ARHGEF2/CASP1/MDK/ATF4/LRP1/F2R/PTPN11/MAVS/WNT5A/ZNF580/POLR3B/SELENOK/LURAP1/IL23A/LY96/CEBPB/UCN	51
BP	GO:0061564	axon development	51/1121	467/18723	2.43078e-05	0.00127423	0.000960116	RAB3A/UNC5B/HSP90AB1/LGR6/NEFL/VEGFA/NTNG2/TRIM46/EPHB4/NRXN3/KLF4/GBX2/PLXNB3/HSP90AA1/SEMA6A/FLNA/CDH4/ANK3/EGR2/DRD2/BOC/SLIT2/EFNB1/S100B/SEMA6B/NRP1/SEMA3B/EFNB3/EIF4G2/DHFR/EFNA1/THY1/LRP1/BRSK1/PTN/EFNB2/PTPN11/VCL/DYNLT1/WNT5A/S100A6/NEXN/NRCAM/EFNA3/GAP43/TSPO/TSKU/TUBB2B/FKBP1B/CRABP2/C12orf57	51
BP	GO:0060760	positive regulation of response to cytokine stimulus	13/1121	57/18723	2.45611e-05	0.00127559	0.00096114	DDX58/AXL/NLRC5/IFIH1/DHX9/CSF1/HIF1A/EDN1/TXK/CASP1/PARP14/MAVS/WNT5A	13
BP	GO:0070482	response to oxygen levels	41/1121	347/18723	2.50893e-05	0.00129106	0.0009728	EGR1/ATP1B1/SFRP1/AHCY/CAV1/HSPD1/CCNA2/ADA/VEGFA/KCNMA1/PINK1/PLOD2/ZFP36L1/IRAK1/DDIT4/AGTRAP/TGFBR2/HIF1A/THBS1/MYC/DRD2/CDKN1A/SMAD3/EDN1/S100B/MMP14/NDNF/CA9/AK4/CASP1/AQP1/ETS1/PTN/FAM162A/HIPK2/ADM/ENDOG/MALAT1/SIRT4/ANG/CARD16	41
BP	GO:0046596	regulation of viral entry into host cell	11/1121	42/18723	2.58621e-05	0.00131873	0.00099365	IFITM1/TRIM22/LY6E/LGALS9/IFITM3/GSN/HS3ST5/NECTIN2/TRIM21/IFITM2/TRIM5	11
BP	GO:1903037	regulation of leukocyte cell-cell adhesion	40/1121	336/18723	2.63893e-05	0.00133349	0.00100477	CAV1/HSPD1/ADA/SOX4/B2M/HLA-E/IL7R/IRAK1/KLF4/LGALS9/NRARP/TGFBR2/CCL2/PELI1/BCL6/LGALS3/ZBTB7B/EFNB1/MALT1/HLA-A/ASS1/EFNB3/TFRC/DUSP10/MDK/ETS1/LOXL3/THY1/ARG2/PTPN11/CCL5/CD70/SLC7A1/SELENOK/EGR3/IL23A/IFNB1/IGFBP2/CEBPB/LGALS7B	40
BP	GO:0050920	regulation of chemotaxis	30/1121	223/18723	2.73297e-05	0.00136868	0.00103129	DUSP1/VEGFA/SERPINE1/LGALS9/CSF1/SEMA6A/CCL2/THBS1/KDR/SMAD3/EDN1/SLIT2/SEMA6B/NRP1/SEMA3B/MDK/MET/S1PR1/PTN/EFNB2/CCL5/WNT5A/SCG2/CCL26/ZNF580/CXCL8/CXCL10/TUBB2B/S100A7/TMSB4X	30
BP	GO:0072001	renal system development	37/1121	302/18723	2.80561e-05	0.00139262	0.00104933	EGR1/CALB1/SFRP1/SOX4/VEGFA/STAT1/BCL2L11/SMAD6/MYC/DLL1/SMAD3/GDF6/SLIT2/LIF/NRP1/FOXF1/AKR1B1/ASS1/CENPF/AQP2/VANGL2/JAG1/GCNT1/OSR2/IQGAP1/ID3/SIX4/ARG2/LZTS2/KCNJ8/MPST/WNT5A/KIF26B/PRDM1/POU3F3/WNT6/RIDA	37
BP	GO:0050918	positive chemotaxis	14/1121	66/18723	2.89746e-05	0.0014256	0.00107417	VEGFA/PLXNB3/KDR/SMAD3/LGALS3/NRP1/LRP1/MET/S1PR1/CCL5/WNT5A/SCG2/CXCL8/CXCL10	14
BP	GO:0001655	urogenital system development	40/1121	338/18723	3.02456e-05	0.0014752	0.00111154	EGR1/CALB1/SFRP1/SOX4/VEGFA/STAT1/BCL2L11/WDR77/SMAD6/MYC/DLL1/SMAD3/GDF6/SLIT2/LIF/NRP1/RARG/FOXF1/AKR1B1/ASS1/CENPF/AQP2/VANGL2/JAG1/GCNT1/OSR2/SMARCC1/IQGAP1/ID3/SIX4/ARG2/LZTS2/KCNJ8/MPST/WNT5A/KIF26B/PRDM1/POU3F3/WNT6/RIDA	40
BP	GO:0007076	mitotic chromosome condensation	7/1121	17/18723	3.09345e-05	0.00148807	0.00112125	PLK1/CDCA5/NCAPD2/NCAPH/NCAPG/SMC2/SMC4	7
BP	GO:0051048	negative regulation of secretion	25/1121	171/18723	3.10402e-05	0.00148807	0.00112125	SFRP1/ADA/SRCIN1/SREBF1/ASIC1/LGALS9/MAP4K4/RSAD2/HLA-F/DRD2/NRG1/EDN1/LIF/FOXF1/CBARP/NMB/F2R/PTPN11/VSNL1/IRS1/IL11/PIM3/FKBP1B/SIRT4/UCN	25
BP	GO:0051701	biological process involved in interaction with host	28/1121	203/18723	3.17305e-05	0.00150827	0.00113647	IFITM1/TRIM22/IFIT1/CAV1/AXL/PLSCR1/LY6E/LGALS9/ITGA5/ITGB5/IFITM3/PC/CHMP3/LDLR/NRP1/EFNB3/TRIM28/TFRC/GSN/HS3ST5/NECTIN2/TRIM21/IFITM2/EFNB2/DYNLT1/CXCL8/EGFR/TRIM5	28
BP	GO:0001822	kidney development	36/1121	293/18723	3.3695e-05	0.0015882	0.00119669	EGR1/CALB1/SFRP1/SOX4/VEGFA/STAT1/BCL2L11/SMAD6/MYC/DLL1/SMAD3/GDF6/SLIT2/LIF/NRP1/AKR1B1/ASS1/CENPF/AQP2/VANGL2/JAG1/GCNT1/OSR2/IQGAP1/ID3/SIX4/ARG2/LZTS2/KCNJ8/MPST/WNT5A/KIF26B/PRDM1/POU3F3/WNT6/RIDA	36
BP	GO:0032760	positive regulation of tumor necrosis factor production	18/1121	103/18723	3.67109e-05	0.00171593	0.00129293	DDX58/OAS1/HSPD1/HLA-E/IFIH1/LGALS9/DHX9/OAS2/AKAP12/THBS1/CLEC7A/ARHGEF2/PTPN11/MAVS/WNT5A/SELENOK/IL23A/LY96	18
BP	GO:0051146	striated muscle cell differentiation	35/1121	283/18723	3.75787e-05	0.00174198	0.00131256	RCAN1/CSRP1/TPM1/VEGFA/GDF15/IGFBP5/TMOD1/MYH9/HNRNPU/SORBS2/DLL1/JAM2/NRG1/EDN1/ALPK2/PIEZO1/MYOF/MMP14/TBX3/KDM6B/PLD3/ADAMTS15/MESP1/SIX4/ADAM12/KRT8/DNER/RGS2/OBSL1/EFNB2/MSX1/TNNT1/CSRP2/CXCL10/MTLN	35
BP	GO:0001667	ameboidal-type cell migration	51/1121	475/18723	3.81547e-05	0.00175418	0.00132175	SP100/ANLN/ENPP2/VEGFA/ZFAND5/CORO1C/JUP/GLUL/EPHB4/ARSB/MYH9/KLF4/GBX2/TGFBR2/NR4A1/MAP4K4/SEMA6A/HIF1A/AKAP12/THBS1/KDR/NANOS1/BCAR1/EDN1/SLIT2/EFNB1/SEMA6B/NRP1/RHOB/SEMA3B/DUSP10/FER/EFNA1/ID1/MESP1/ETS1/NRTN/ATOH8/CDH5/MET/PTN/EFNB2/PTPN11/WNT5A/S100A2/SCG2/ZNF580/LAMTOR2/RRAS/EGR3/TMSB4X	51
BP	GO:0022409	positive regulation of cell-cell adhesion	35/1121	284/18723	4.04534e-05	0.00184474	0.00138999	CAV1/HSPD1/ADA/SOX4/B2M/HLA-E/IL7R/IRAK1/LGALS9/TGFBR2/CCL2/ANK3/BCL6/ZBTB7B/EFNB1/PIEZO1/MALT1/HLA-A/EFNB3/TFRC/DUSP10/MDK/ETS1/THY1/SOX2/PTPN11/CCL5/CD70/WNT5A/KIF26B/SLC7A1/SELENOK/EGR3/IL23A/IGFBP2	35
BP	GO:0070229	negative regulation of lymphocyte apoptotic process	9/1121	30/18723	4.35586e-05	0.00195161	0.00147052	ADA/IL7R/HIF1A/NOC2L/BCL6/TSC22D3/EFNA1/ARG2/CCL5	9
BP	GO:0032479	regulation of type I interferon production	17/1121	95/18723	4.38408e-05	0.00195161	0.00147052	DDX58/OAS1/HSPD1/POLA1/IFIH1/IRAK1/STAT1/HSP90AA1/DHX9/OAS2/DHX58/NMI/ISG15/TRIM21/PTPN11/MAVS/POLR3B	17
BP	GO:0032606	type I interferon production	17/1121	95/18723	4.38408e-05	0.00195161	0.00147052	DDX58/OAS1/HSPD1/POLA1/IFIH1/IRAK1/STAT1/HSP90AA1/DHX9/OAS2/DHX58/NMI/ISG15/TRIM21/PTPN11/MAVS/POLR3B	17
BP	GO:0045444	fat cell differentiation	30/1121	229/18723	4.53665e-05	0.00200363	0.00150971	SFRP1/HMGA2/ZFP36L1/ID2/SREBF1/KLF4/HNRNPU/NR4A1/SMAD6/EGR2/SMAD3/GDF6/PSMB8/ZBTB7B/CCND1/ZFP36/JAG1/DUSP10/ATF5/RGS2/GPER1/WNT5A/ZNF385A/METRNL/IL11/GDF3/SH2B2/C1QL4/NOCT/CEBPB	30
BP	GO:0043123	positive regulation of I-kappaB kinase/NF-kappaB signaling	26/1121	186/18723	4.76867e-05	0.00208736	0.0015728	CTH/TRIM22/TNFSF10/SLC20A1/PINK1/CXXC5/IRAK1/LGALS9/LPAR1/FLNA/S100A4/CLEC7A/PELI1/BST2/S100B/MALT1/CASP1/TFRC/ECT2/F2R/TRIM21/MAVS/LURAP1/TRIM5/IKBKG/CARD16	26
BP	GO:0071360	cellular response to exogenous dsRNA	7/1121	18/18723	4.80066e-05	0.00208736	0.0015728	DDX58/IFIT1/CAV1/IFIH1/DHX9/MAVS/IFNB1	7
BP	GO:0033674	positive regulation of kinase activity	50/1121	467/18723	4.87238e-05	0.00210225	0.00158402	EGR1/TPX2/HSP90AB1/AXL/VEGFA/HMGA2/PINK1/SRCIN1/EPHB4/IRAK1/HSP90AA1/TPD52L1/MAPRE3/TGFBR2/PRKAG2/CSF1/AGAP2/INCENP/SLC27A1/DLG4/CENPE/THBS1/KDR/DRD2/CDKN1A/NRG1/EDN1/LMO4/CCND1/MALT1/MAP3K10/KIF14/EFNA1/ECT2/IQGAP1/CLSPN/MET/CEMIP/CCL5/EEF1A2/WNT5A/IRS1/IGF1R/NEURL1/EGFR/IL23A/NAB2/TCIM/ANG/UCN	50
BP	GO:1901215	negative regulation of neuron death	28/1121	208/18723	4.94114e-05	0.00211564	0.00159411	UNC5B/FAIM2/HSP90AB1/NEFL/HSPD1/AXL/PINK1/BTG2/CSF1/AGAP2/TOX3/CCL2/HLA-F/HIF1A/EIF4G1/NRP1/NDNF/SLC7A11/KIF14/MDK/ATF4/SIX4/LRP1/F2R/HIPK2/IKBKG/CEBPB/UCN	28
BP	GO:0061351	neural precursor cell proliferation	22/1121	145/18723	5.14739e-05	0.00218004	0.00164263	RRM1/VEGFA/SHCBP1/SLC16A2/ID2/BTG2/GBX2/TEAD3/NF2/FLNA/HIF1A/DRD2/ARHGEF2/KIF14/MDK/SMARCD3/ATF5/PTN/ZNF503/WNT5A/ASPM/POU3F3	22
BP	GO:0150104	transport across blood-brain barrier	16/1121	87/18723	5.16928e-05	0.00218004	0.00164263	SLC16A2/SLC38A3/SLC29A4/SLC5A6/SLC27A1/SLC1A3/SLC6A6/SLC2A3/SLC5A3/ABCA2/TFRC/SLC6A9/LRP1/KCNJ8/SLC7A1/SLC29A2	16
BP	GO:0071384	cellular response to corticosteroid stimulus	13/1121	61/18723	5.27026e-05	0.00220603	0.00166222	ZFP36L1/AKR1C3/FBXO32/BCL2L11/DDIT4/HNRNPU/EDN1/KLF9/ASS1/ZFP36/AQP1/GPER1/EGFR	13
BP	GO:0046822	regulation of nucleocytoplasmic transport	18/1121	106/18723	5.44504e-05	0.00226232	0.00170463	KHDRBS1/MX2/SP100/HSP90AB1/IPO5/JUP/DHX9/NEDD4/FLNA/SMAD3/SFN/IFI27/TRIM28/ECT2/PTPN11/MAVS/NOLC1/UHMK1	18
BP	GO:0032102	negative regulation of response to external stimulus	46/1121	420/18723	5.59354e-05	0.00230692	0.00173824	OAS1/C1QTNF1/DUSP1/SERPINE2/ADA/USP18/NLRC5/SERPINE1/HLA-E/NT5E/HLA-B/KLF4/LGALS9/SEMA6A/CCL2/HLA-F/DHX58/THBS1/DRD2/SMAD3/NMI/EDN1/ISG15/SLIT2/LDLR/SEMA6B/NRP1/FOXF1/SEMA3B/HLA-A/ZFP36/DUSP10/MDK/NFKB1/PARP14/TRIB1/ARG2/CDH5/TRIM21/GPER1/WNT5A/METRNL/SMPDL3B/CD109/CARD16/UCN	46
BP	GO:0042542	response to hydrogen peroxide	22/1121	146/18723	5.72438e-05	0.0023226	0.00175005	TXNIP/DUSP1/HSPD1/ADA/AXL/PINK1/STAT1/KLF4/FOSL1/RHOB/KDM6B/JUN/ECT2/AQP1/ETS1/KLF2/MET/PTPN11/MAP1LC3A/ZNF580/ENDOG/FKBP1B	22
BP	GO:0046676	negative regulation of insulin secretion	10/1121	38/18723	5.75578e-05	0.0023226	0.00175005	SFRP1/SREBF1/MAP4K4/DRD2/PTPN11/VSNL1/IRS1/PIM3/FKBP1B/SIRT4	10
BP	GO:0071398	cellular response to fatty acid	10/1121	38/18723	5.75578e-05	0.0023226	0.00175005	AKR1C1/AKR1C3/SREBF1/EDN1/LDLR/ASS1/AKR1C2/ID3/CPT1A/IRS1	10
BP	GO:0003158	endothelium development	21/1121	136/18723	5.81961e-05	0.00233159	0.00175682	EZR/VEGFA/DLL1/KDR/NRG1/NRP1/RHOB/KDM6B/JAG1/TJP3/ID1/MESP1/ATOH8/CDH5/MET/S1PR1/PTN/S1PR2/VCL/CXCL10/GSTM3	21
BP	GO:0010232	vascular transport	16/1121	88/18723	5.97192e-05	0.00235891	0.00177741	SLC16A2/SLC38A3/SLC29A4/SLC5A6/SLC27A1/SLC1A3/SLC6A6/SLC2A3/SLC5A3/ABCA2/TFRC/SLC6A9/LRP1/KCNJ8/SLC7A1/SLC29A2	16
BP	GO:1901657	glycosyl compound metabolic process	16/1121	88/18723	5.97192e-05	0.00235891	0.00177741	AKR1C1/AHCY/APOBEC3F/ADA/APOBEC3G/NT5E/AKR1C3/APOBEC3C/DNPH1/AKR1B1/AKR1C2/FUCA1/UPP1/AKR1A1/NME4/MACROD1	16
BP	GO:0006979	response to oxidative stress	48/1121	446/18723	6.02697e-05	0.0023603	0.00177846	TXNIP/RCAN1/SESN2/FOS/DUSP1/HSPD1/ADA/TPM1/AXL/SFPQ/PINK1/HNRNPM/AKR1C3/STAT1/PNPT1/KLF4/HIF1A/SLC4A11/NEIL1/EDN1/FOSL1/RHOB/MMP14/KDM6B/JUN/DHFR/SLC7A11/FER/ATF4/ECT2/AQP1/ETS1/KLF2/MET/GCH1/PTPN11/MAP1LC3A/ZNF580/SELENOK/EGFR/MSRB2/PRDX5/GPX4/S100A7/ENDOG/FKBP1B/ROMO1/UCN	48
BP	GO:1902107	positive regulation of leukocyte differentiation	23/1121	157/18723	6.14591e-05	0.0023603	0.00177846	FOS/ADA/SOX4/AXL/ZFP36L1/ID2/IL7R/LGALS9/TGFBR2/CSF1/BCL6/ZBTB7B/LIF/MMP14/MALT1/EVI2B/JUN/DUSP10/MDK/TRIB1/PRKDC/EGR3/IL23A	23
BP	GO:1903708	positive regulation of hemopoiesis	23/1121	157/18723	6.14591e-05	0.0023603	0.00177846	FOS/ADA/SOX4/AXL/ZFP36L1/ID2/IL7R/LGALS9/TGFBR2/CSF1/BCL6/ZBTB7B/LIF/MMP14/MALT1/EVI2B/JUN/DUSP10/MDK/TRIB1/PRKDC/EGR3/IL23A	23
BP	GO:0060562	epithelial tube morphogenesis	38/1121	325/18723	6.15122e-05	0.0023603	0.00177846	SFRP1/SOX4/VEGFA/GBX2/NRARP/TGFBR2/CSF1/HIF1A/MYC/DLL1/KDR/SMAD3/EDN1/LMO4/SLIT2/MYCN/MTHFD1/NRP1/RHOB/RARG/FOXF1/MMP14/TBX3/PRICKLE1/VANGL2/MDK/MESP1/SIX4/MTHFD1L/LZTS2/MET/WNT5A/SHROOM3/KIF26B/KIF20B/CXCL10/WNT6/ADM	38
BP	GO:1903557	positive regulation of tumor necrosis factor superfamily cytokine production	18/1121	107/18723	6.18585e-05	0.0023603	0.00177846	DDX58/OAS1/HSPD1/HLA-E/IFIH1/LGALS9/DHX9/OAS2/AKAP12/THBS1/CLEC7A/ARHGEF2/PTPN11/MAVS/WNT5A/SELENOK/IL23A/LY96	18
BP	GO:0007160	cell-matrix adhesion	30/1121	233/18723	6.27753e-05	0.0023791	0.00179262	SFRP1/ITGBL1/VEGFA/CORO1C/SERPINE1/JUP/BCL2L11/MAP4K4/CSF1/NF2/ITGB5/THBS1/KDR/SMAD3/BCL6/BCAM/NRP1/MMP14/JAG1/IQGAP1/THY1/LRP1/EFEMP2/PTPN11/THBS3/VCL/LIMCH1/RRAS/MSLN/UTRN	30
BP	GO:0042398	cellular modified amino acid biosynthetic process	11/1121	46/18723	6.46454e-05	0.00242068	0.00182396	PLOD2/PLSCR1/SLC27A1/CHDH/MTHFD1/CHAC1/DHFR/SLC7A11/MTHFD1L/GCH1/GAMT	11
BP	GO:0002833	positive regulation of response to biotic stimulus	24/1121	168/18723	6.47357e-05	0.00242068	0.00182396	HSPD1/SFPQ/NLRC5/PLSCR1/OASL/HLA-E/HSP90AA1/DHX9/HLA-F/DHX58/CLEC7A/NMI/IFI35/TXK/NECTIN2/CCL5/MAVS/WNT5A/DDX60/PRKDC/POLR3B/TRIM5/IFNB1/LY96	24
BP	GO:0070228	regulation of lymphocyte apoptotic process	12/1121	54/18723	6.58927e-05	0.00244763	0.00184426	ADA/IL7R/LGALS9/HIF1A/NOC2L/BCL6/LGALS3/TSC22D3/EFNA1/ARG2/CCL5/WNT5A	12
BP	GO:0007626	locomotory behavior	25/1121	179/18723	6.71084e-05	0.00247639	0.00186593	RCAN1/EGR1/CALB1/ID2/CLN6/TMOD1/NEGR1/DLG4/NLGN2/KCNJ10/GLRB/ALDH1A3/DRD2/NRG1/EFNB3/EPS8/ABCA2/LGI4/NAGLU/GAA/SNCG/HIPK2/HOXD9/NAV2/C1QL1	25
BP	GO:0052547	regulation of peptidase activity	49/1121	461/18723	6.93451e-05	0.0025422	0.00191552	SERPINE2/TNFSF10/CAV1/HSPD1/VEGFA/PINK1/CAST/SERPINE1/BCL2L11/KLF4/LGALS9/NR4A1/CLDN4/THBS1/CLEC7A/IFI6/MYC/SERPINB8/CRIM1/SMAD3/BST2/PSMB9/PSMB8/SERPINA5/BIRC5/PSME1/MALT1/SFN/NLRP1/ABCA2/CASP1/GSN/EFNA1/AQP1/SOX2/LRP1/TIMP3/F2R/PCSK1N/GPER1/BEX3/EFNA3/BBC3/FAM162A/PCOLCE/CD109/PRDX5/PSME2/CARD16	49
BP	GO:0002832	negative regulation of response to biotic stimulus	18/1121	108/18723	7.0144e-05	0.00255479	0.001925	OAS1/USP18/NLRC5/HLA-E/HLA-B/LGALS9/HLA-F/DHX58/DRD2/NMI/ISG15/HLA-A/DUSP10/PARP14/TRIB1/ARG2/TRIM21/CARD16	18
BP	GO:0031667	response to nutrient levels	50/1121	474/18723	7.11737e-05	0.00257097	0.00193719	SESN2/SFRP1/AHCY/HSPA8/ADA/OXCT1/GDF15/TYMS/MYBBP1A/SLC38A3/GLUL/AKR1C3/STAT1/SREBF1/ARSB/TGFBR2/PRKAG2/CAD/EIF4G1/ATF3/HMGCS1/CDKN1A/DNAJC15/GIPR/LDLR/CCND1/ASS1/RRAGD/JUN/ZFP36/TFEB/ATF4/KRT18/ITFG2/CPT1A/BRSK1/PCSK1N/TBC1D5/PTN/MAP1LC3A/UPP1/TSPO/CXCL10/EGFR/IGFBP2/ADM/ABCA1/FKBP1B/UCN2/UCN	50
BP	GO:0070233	negative regulation of T cell apoptotic process	7/1121	19/18723	7.20895e-05	0.00257097	0.00193719	ADA/IL7R/HIF1A/TSC22D3/EFNA1/ARG2/CCL5	7
BP	GO:0045446	endothelial cell differentiation	19/1121	118/18723	7.24216e-05	0.00257097	0.00193719	EZR/VEGFA/DLL1/KDR/NRG1/NRP1/KDM6B/JAG1/TJP3/ID1/MESP1/ATOH8/CDH5/MET/S1PR1/PTN/S1PR2/VCL/GSTM3	19
BP	GO:0071346	cellular response to interferon-gamma	19/1121	118/18723	7.24216e-05	0.00257097	0.00193719	SP100/HSP90AB1/GBP2/NLRC5/STAT1/LGALS9/CCL2/NMI/EDN1/TXK/ASS1/CASP1/PARP14/GBP1/VIM/CCL5/FLNB/WNT5A/CCL26	19
BP	GO:0043409	negative regulation of MAPK cascade	25/1121	180/18723	7.35929e-05	0.00259612	0.00195614	EZR/SFRP1/DUSP1/CAV1/FOXM1/PINK1/KLF4/CAMK2N1/SEMA6A/NF2/ATF3/EIF3A/MYC/LIF/ABCA7/DUSP10/EFNA1/DUSP6/GBP1/TIMP3/RGS2/GPER1/IGF1R/DUSP8/C1QL4	25
BP	GO:0050767	regulation of neurogenesis	41/1121	364/18723	7.50167e-05	0.0026298	0.00198153	SERPINE2/NEFL/VEGFA/B2M/TRIM46/ID2/PLXNB3/SEMA6A/NF2/HIF1A/CDH4/DLL1/EGR2/DRD2/HES7/SLIT2/LDLR/MYCN/SEMA6B/LIF/NRP1/SEMA3B/EFNB3/EIF4G2/DUSP10/MDK/ID1/THY1/LRP1/SMARCD3/PTN/OBSL1/GPER1/DYNLT1/WNT5A/TSPO/ASPM/NEURL1/EGFR/CRABP2/DLL3	41
BP	GO:0090130	tissue migration	41/1121	365/18723	7.9753e-05	0.00277466	0.00209067	SP100/ANLN/ENPP2/VEGFA/CORO1C/JUP/GLUL/EPHB4/ARSB/MYH9/KLF4/TGFBR2/NR4A1/MAP4K4/HIF1A/THBS1/KDR/NANOS1/BCAR1/EDN1/SLIT2/NRP1/RHOB/FOXF1/DUSP10/EFNA1/ID1/ETS1/ATOH8/CDH5/MET/PTN/EFNB2/PTPN11/WNT5A/S100A2/SCG2/ZNF580/RRAS/EGR3/TMSB4X	41
BP	GO:0045766	positive regulation of angiogenesis	25/1121	181/18723	8.06327e-05	0.00277466	0.00209067	VEGFA/HMGA2/SERPINE1/JUP/KLF4/ITGA5/TGFBR2/HIF1A/THBS1/DLL1/KDR/NRP1/RHOB/NINJ1/BRCA1/MDK/AQP1/ETS1/CDH5/ADAM12/WNT5A/CXCL8/RRAS/HIPK2/ADM	25
BP	GO:1904018	positive regulation of vasculature development	25/1121	181/18723	8.06327e-05	0.00277466	0.00209067	VEGFA/HMGA2/SERPINE1/JUP/KLF4/ITGA5/TGFBR2/HIF1A/THBS1/DLL1/KDR/NRP1/RHOB/NINJ1/BRCA1/MDK/AQP1/ETS1/CDH5/ADAM12/WNT5A/CXCL8/RRAS/HIPK2/ADM	25
BP	GO:0010948	negative regulation of cell cycle process	35/1121	294/18723	8.23513e-05	0.00281652	0.00212221	PLK1/BUB1B/DUSP1/SOX4/HMGA2/ZFP36L1/SPDL1/KLF4/GTSE1/NACC2/CCL2/E2F8/NEK2/CDKN1A/BCL6/TICRR/ESPL1/CCND1/LIF/CENPF/BRCA1/BUB1/ZNF655/PPP2R5B/CCNF/BRSK1/CLSPN/ATF5/PTPN11/RBL1/GPER1/MDC1/PRKDC/BRCC3/FBXO6	35
BP	GO:1901987	regulation of cell cycle phase transition	43/1121	390/18723	8.29758e-05	0.00282067	0.00212535	PLK1/BUB1B/DUSP1/ANLN/CDCA5/SOX4/HMGA2/ZFP36L1/ID2/SPDL1/KLF4/FAM83D/GTSE1/AURKA/DLGAP5/NACC2/CCL2/EIF4G1/CENPE/CDKN1A/TICRR/ESPL1/CCND1/PSME1/CENPF/BRCA1/BUB1/KIF14/ZNF655/BRSK1/SMARCD3/CLSPN/ATF5/PTPN11/RBL1/MDC1/PRKDC/BRCC3/EGFR/FBXO6/TCIM/PSME2/CDC26	43
BP	GO:0009914	hormone transport	36/1121	306/18723	8.37481e-05	0.00282978	0.00213221	SFRP1/C1QTNF1/OXCT1/SOX4/SLC16A2/GLUL/SREBF1/MAP4K4/CAMK2N1/NLGN2/HIF1A/DRD2/SLCO4A1/EDN1/GIPR/LIF/TBX3/RAPGEF4/SELENOM/LRP1/NMB/CPT1A/PTPN11/CCL5/VSNL1/GPER1/IRS1/TCIRG1/ILDR2/IL11/EGFR/PIM3/ADM/FKBP1B/SIRT4/UCN	36
BP	GO:0034616	response to laminar fluid shear stress	6/1121	14/18723	8.99678e-05	0.00301198	0.00226949	KLF4/SMAD6/ASS1/ETS1/KLF2/ABCA1	6
BP	GO:0048872	homeostasis of number of cells	33/1121	272/18723	9.02143e-05	0.00301198	0.00226949	ADA/SOX4/AXL/VEGFA/B2M/ZFP36L1/ID2/IL7R/STAT1/BCL2L11/THRA/LGALS9/CSF1/SLC25A5/HIF1A/BCL6/ISG15/NCAPG2/P4HTM/TSC22D3/ZFP36/SLC7A11/ETS1/BPGM/KLF2/F2R/PTPN11/RAC3/TCIRG1/PRKDC/ILDR2/HIPK2/SH2B2	33
BP	GO:0072527	pyrimidine-containing compound metabolic process	15/1121	82/18723	9.36814e-05	0.00310922	0.00234276	RRM1/APOBEC3F/CMPK2/CTPS1/TYMS/APOBEC3G/CAD/APOBEC3C/NEIL1/ENTPD7/UPP1/NTHL1/NT5M/NME4/NME3	15
BP	GO:0019883	antigen processing and presentation of endogenous antigen	8/1121	26/18723	9.53555e-05	0.00313119	0.00235932	TAP1/B2M/HLA-E/HLA-B/HLA-F/HLA-C/HLA-A/HLA-H	8
BP	GO:0032608	interferon-beta production	12/1121	56/18723	9.6018e-05	0.00313119	0.00235932	DDX58/OAS1/IFIH1/HSP90AA1/DHX9/OAS2/DHX58/NMI/ISG15/PTPN11/MAVS/POLR3B	12
BP	GO:0032648	regulation of interferon-beta production	12/1121	56/18723	9.6018e-05	0.00313119	0.00235932	DDX58/OAS1/IFIH1/HSP90AA1/DHX9/OAS2/DHX58/NMI/ISG15/PTPN11/MAVS/POLR3B	12
BP	GO:0050870	positive regulation of T cell activation	28/1121	216/18723	9.66266e-05	0.00313282	0.00236055	CAV1/HSPD1/ADA/SOX4/B2M/HLA-E/IL7R/LGALS9/TGFBR2/CCL2/BCL6/ZBTB7B/EFNB1/MALT1/HLA-A/EFNB3/TFRC/DUSP10/MDK/THY1/PTPN11/CCL5/CD70/SLC7A1/SELENOK/EGR3/IL23A/IGFBP2	28
BP	GO:0030261	chromosome condensation	11/1121	48/18723	9.80707e-05	0.00316137	0.00238206	PLK1/CDCA5/HMGA2/NCAPD2/NCAPH/INCENP/NCAPG/NCAPG2/SMC2/SMC4/GPER1	11
BP	GO:0150117	positive regulation of cell-substrate junction organization	9/1121	33/18723	9.97847e-05	0.00319625	0.00240834	SFRP1/VEGFA/MAP4K4/KDR/SMAD3/NRP1/IQGAP1/THY1/PTPN11	9
BP	GO:1903039	positive regulation of leukocyte cell-cell adhesion	30/1121	239/18723	0.000100292	0.00319625	0.00240834	CAV1/HSPD1/ADA/SOX4/B2M/HLA-E/IL7R/IRAK1/LGALS9/TGFBR2/CCL2/BCL6/ZBTB7B/EFNB1/MALT1/HLA-A/EFNB3/TFRC/DUSP10/MDK/ETS1/THY1/PTPN11/CCL5/CD70/SLC7A1/SELENOK/EGR3/IL23A/IGFBP2	30
BP	GO:0010631	epithelial cell migration	40/1121	357/18723	0.000102455	0.00321065	0.00241919	SP100/ANLN/ENPP2/VEGFA/CORO1C/JUP/GLUL/EPHB4/ARSB/MYH9/KLF4/TGFBR2/NR4A1/MAP4K4/HIF1A/THBS1/KDR/NANOS1/BCAR1/EDN1/SLIT2/NRP1/RHOB/DUSP10/EFNA1/ID1/ETS1/ATOH8/CDH5/MET/PTN/EFNB2/PTPN11/WNT5A/S100A2/SCG2/ZNF580/RRAS/EGR3/TMSB4X	40
BP	GO:0003206	cardiac chamber morphogenesis	19/1121	121/18723	0.000102462	0.00321065	0.00241919	TPM1/SOX4/LY6E/FGFRL1/TGFBR2/PARVA/HIF1A/SMAD6/NRG1/SLIT2/NRP1/FOXF1/TBX3/JAG1/PKP2/MESP1/SMARCD3/WNT5A/DHRS3	19
BP	GO:1904019	epithelial cell apoptotic process	19/1121	121/18723	0.000102462	0.00321065	0.00241919	CAST/SERPINE1/ZFP36L1/AKR1C3/TGFBR2/CCL2/THBS1/KDR/NUPR1/NDNF/ZFP36/E2F2/GSN/MDK/KRT18/CDH5/KRT8/GPER1/SCG2	19
BP	GO:0051310	metaphase plate congression	13/1121	65/18723	0.000105487	0.00328709	0.00247678	CDCA5/SPDL1/KPNB1/FAM83D/HNRNPU/INCENP/CENPE/KIFC1/SPAG5/CDCA8/CENPF/KIF14/CHAMP1	13
BP	GO:0001654	eye development	41/1121	371/18723	0.000114338	0.00354321	0.00266976	CALB1/RRM1/EFEMP1/VEGFA/MFN2/TMOD1/KLF4/TGFBR2/NF2/HIF1A/DLL1/ALDH1A3/MEIS3/DRD2/SMAD3/NRP1/RARG/JAG1/ACHE/SLC7A11/NAGLU/OSR2/ATF4/THY1/SOX2/VIM/SMARCD3/PTN/OBSL1/WNT5A/FKBP8/TCIRG1/PRDM1/TENM3/TSKU/HIPK2/SALL2/WNT6/CRYBA2/GDF3/C12orf57	41
BP	GO:0031032	actomyosin structure organization	26/1121	196/18723	0.000115661	0.00356453	0.00268583	SFRP1/CSRP1/ANLN/TPM1/TMOD1/MYH9/LPAR1/NF2/ITGB5/SMAD3/EDN1/NRP1/FRMD5/ECT2/SIX4/KRT8/CIT/MET/S1PR1/OBSL1/EPB41L2/FAM171A1/TNNT1/CSRP2/LIMCH1/LURAP1	26
BP	GO:0015833	peptide transport	32/1121	264/18723	0.000116558	0.00357253	0.00269186	SFRP1/TAP1/OXCT1/SOX4/GLUL/SREBF1/SLC15A3/MAP4K4/CAMK2N1/NLGN2/HIF1A/DRD2/EDN1/GIPR/SLC7A11/RAPGEF4/LRP1/CPT1A/PTPN11/CCL5/VSNL1/GPER1/IRS1/TCIRG1/ILDR2/EGFR/PIM3/SLC15A1/ABCA1/FKBP1B/SIRT4/UCN	32
BP	GO:0097305	response to alcohol	31/1121	253/18723	0.00012134	0.0036989	0.00278708	FOSB/SFRP1/FOS/NEFL/OXCT1/TYMS/JUP/AKR1C3/SREBF1/KLF4/TGFBR2/LANCL2/CAD/HMGCS1/DRD2/CDKN1A/FOSL1/SLIT2/CCND1/KLF9/EPS8/BRCA1/ABCA2/AKR1C2/KLF2/CPT1A/RGS2/GRAMD1A/TSPO/ABCA1/MLC1	31
BP	GO:0090132	epithelium migration	40/1121	360/18723	0.000122752	0.00371256	0.00279737	SP100/ANLN/ENPP2/VEGFA/CORO1C/JUP/GLUL/EPHB4/ARSB/MYH9/KLF4/TGFBR2/NR4A1/MAP4K4/HIF1A/THBS1/KDR/NANOS1/BCAR1/EDN1/SLIT2/NRP1/RHOB/DUSP10/EFNA1/ID1/ETS1/ATOH8/CDH5/MET/PTN/EFNB2/PTPN11/WNT5A/S100A2/SCG2/ZNF580/RRAS/EGR3/TMSB4X	40
BP	GO:1901342	regulation of vasculature development	39/1121	348/18723	0.00012385	0.00371256	0.00279737	SFRP1/SP100/ENPP2/VEGFA/HMGA2/SERPINE1/JUP/GLUL/STAT1/ADGRB2/KLF4/ITGA5/TGFBR2/SEMA6A/HIF1A/THBS1/DLL1/KDR/NRP1/RHOB/NINJ1/BRCA1/E2F2/MDK/EFNA1/AQP1/ID1/ETS1/KLF2/CDH5/ADAM12/PTN/WNT5A/EFNA3/CXCL8/CXCL10/RRAS/HIPK2/ADM	39
BP	GO:0019221	cytokine-mediated signaling pathway	49/1121	472/18723	0.00012394	0.00371256	0.00279737	EGR1/IFITM1/OAS1/MX1/SP100/HSP90AB1/CAV1/AXL/USP18/NLRC5/OASL/IL7R/IRAK1/STAT1/PLP2/CSF1/SLC27A1/CCL2/HIF1A/IFITM3/OAS2/EPOR/NMI/EDN1/ISG15/SLIT2/TXK/IFI27/CASP1/FER/PARP14/KRT18/RPS6KA4/KRT8/IFITM2/PTPN11/CCL5/CD70/MAVS/WNT5A/CCL26/CXCL8/CXCL10/RNF113A/IFNB1/GPR75/SH2B2/TMSB4X/CARD16	49
BP	GO:0098586	cellular response to virus	15/1121	84/18723	0.000124436	0.00371256	0.00279737	DDX58/OAS1/OASL/IFIH1/LGALS9/HSP90AA1/HIF1A/DHX58/IFI6/SMAD3/NFKB1/CCL5/DDX60/CXCL10/IFNB1	15
BP	GO:0030856	regulation of epithelial cell differentiation	22/1121	154/18723	0.000128465	0.00381249	0.00287267	CAV1/VEGFA/SERPINE1/ZFP36L1/STAT1/DLL1/MYCN/CCND1/LIF/TBX3/SFN/ZFP36/JAG1/ID1/MESP1/ATOH8/CDH5/S1PR2/VCL/CD109/GDF3/CEBPB	22
BP	GO:0042886	amide transport	35/1121	301/18723	0.000131813	0.00389127	0.00293202	SFRP1/TAP1/OXCT1/SOX4/GLUL/SREBF1/SLC15A3/MAP4K4/CAMK2N1/SLC5A6/SLC27A1/NLGN2/HIF1A/DRD2/EDN1/GIPR/ABCA2/SLC7A11/RAPGEF4/LRP1/CPT1A/PTPN11/CCL5/VSNL1/GPER1/IRS1/TCIRG1/ILDR2/EGFR/PIM3/SLC15A1/ABCA1/FKBP1B/SIRT4/UCN	35
BP	GO:0002064	epithelial cell development	28/1121	220/18723	0.000132908	0.00390305	0.0029409	EZR/VEGFA/TYMS/TMOD1/FLNA/HIF1A/DLL1/CDKN1A/PDZD7/WHRN/RARG/AKR1B1/SFN/JAG1/TJP3/ATF4/IQGAP1/VIM/CDH5/MET/S1PR2/VCL/FLNB/WNT5A/SHROOM3/PRDM1/NKX3-2/GSTM3	28
BP	GO:0045860	positive regulation of protein kinase activity	42/1121	386/18723	0.000133993	0.00391442	0.00294947	EGR1/TPX2/HSP90AB1/VEGFA/HMGA2/PINK1/SRCIN1/IRAK1/HSP90AA1/TPD52L1/MAPRE3/TGFBR2/PRKAG2/CSF1/AGAP2/INCENP/SLC27A1/DLG4/CENPE/THBS1/DRD2/CDKN1A/NRG1/EDN1/CCND1/MALT1/MAP3K10/KIF14/EFNA1/ECT2/IQGAP1/CLSPN/CEMIP/CCL5/WNT5A/NEURL1/EGFR/IL23A/NAB2/TCIM/ANG/UCN	42
BP	GO:0043281	regulation of cysteine-type endopeptidase activity involved in apoptotic process	27/1121	209/18723	0.000135344	0.00393339	0.00296377	TNFSF10/HSPD1/VEGFA/BCL2L11/KLF4/LGALS9/NR4A1/THBS1/CLEC7A/IFI6/MYC/SMAD3/BIRC5/MALT1/SFN/NLRP1/CASP1/GSN/AQP1/SOX2/F2R/GPER1/BEX3/BBC3/FAM162A/PRDX5/CARD16	27
BP	GO:0140374	antiviral innate immune response	6/1121	15/18723	0.000142358	0.00409492	0.00308547	DDX58/OAS1/MX1/IFIT1/NLRP1/CXCL10	6
BP	GO:1902895	positive regulation of pri-miRNA transcription by RNA polymerase II	10/1121	42/18723	0.000143969	0.00409492	0.00308547	EGR1/FOS/KLF4/HIF1A/SMAD6/SMAD3/FOSL1/JUN/ETS1/ATOH8	10
BP	GO:0150063	visual system development	41/1121	375/18723	0.000144411	0.00409492	0.00308547	CALB1/RRM1/EFEMP1/VEGFA/MFN2/TMOD1/KLF4/TGFBR2/NF2/HIF1A/DLL1/ALDH1A3/MEIS3/DRD2/SMAD3/NRP1/RARG/JAG1/ACHE/SLC7A11/NAGLU/OSR2/ATF4/THY1/SOX2/VIM/SMARCD3/PTN/OBSL1/WNT5A/FKBP8/TCIRG1/PRDM1/TENM3/TSKU/HIPK2/SALL2/WNT6/CRYBA2/GDF3/C12orf57	41
BP	GO:0006220	pyrimidine nucleotide metabolic process	11/1121	50/18723	0.000145235	0.00409492	0.00308547	CMPK2/CTPS1/TYMS/CAD/NEIL1/ENTPD7/UPP1/NTHL1/NT5M/NME4/NME3	11
BP	GO:0070231	T cell apoptotic process	11/1121	50/18723	0.000145235	0.00409492	0.00308547	ADA/IL7R/BCL2L11/LGALS9/HIF1A/LGALS3/TSC22D3/EFNA1/ARG2/CCL5/WNT5A	11
BP	GO:1902105	regulation of leukocyte differentiation	33/1121	279/18723	0.000146928	0.00409492	0.00308547	SFRP1/FOS/ADA/SOX4/AXL/TMEM178A/ZFP36L1/ID2/IL7R/HLA-B/LGALS9/NRARP/TGFBR2/CSF1/MYC/BCL6/ZBTB7B/LIF/MMP14/MALT1/EVI2B/JUN/TCTA/DUSP10/MDK/LOXL3/TRIB1/PRDM1/PRKDC/EGR3/IL23A/IFNB1/CEBPB	33
BP	GO:0043524	negative regulation of neuron apoptotic process	21/1121	145/18723	0.000148923	0.00409492	0.00308547	UNC5B/FAIM2/HSP90AB1/NEFL/HSPD1/AXL/PINK1/BTG2/AGAP2/TOX3/CCL2/HIF1A/NRP1/NDNF/KIF14/MDK/SIX4/LRP1/F2R/HIPK2/CEBPB	21
BP	GO:0030638	polyketide metabolic process	5/1121	10/18723	0.000149133	0.00409492	0.00308547	AKR1C1/AKR1C3/AKR1B1/AKR1C2/AKR1A1	5
BP	GO:0030647	aminoglycoside antibiotic metabolic process	5/1121	10/18723	0.000149133	0.00409492	0.00308547	AKR1C1/AKR1C3/AKR1B1/AKR1C2/AKR1A1	5
BP	GO:0044598	doxorubicin metabolic process	5/1121	10/18723	0.000149133	0.00409492	0.00308547	AKR1C1/AKR1C3/AKR1B1/AKR1C2/AKR1A1	5
BP	GO:0070099	regulation of chemokine-mediated signaling pathway	5/1121	10/18723	0.000149133	0.00409492	0.00308547	HIF1A/EDN1/SLIT2/CCL5/RNF113A	5
BP	GO:0038083	peptidyl-tyrosine autophosphorylation	7/1121	21/18723	0.000149663	0.00409492	0.00308547	CAV1/VEGFA/KDR/TXK/IQGAP1/IGF1R/EGFR	7
BP	GO:0003007	heart morphogenesis	30/1121	246/18723	0.000168654	0.00459214	0.00346012	TPM1/SOX4/VEGFA/EPHB4/LY6E/FGFRL1/TGFBR2/FLNA/PARVA/HIF1A/SMAD6/DLL1/NRG1/SMAD3/ALPK2/SLIT2/NRP1/FOXF1/TBX3/VANGL2/JAG1/PKP2/EFNA1/MESP1/GAA/SMARCD3/S1PR1/WNT5A/DHRS3/MSX1	30
BP	GO:0050863	regulation of T cell activation	37/1121	329/18723	0.00017027	0.00459586	0.00346292	CAV1/HSPD1/ADA/SOX4/B2M/HLA-E/IL7R/LGALS9/NRARP/TGFBR2/CCL2/PELI1/BCL6/LGALS3/ZBTB7B/EFNB1/MALT1/HLA-A/EFNB3/TFRC/DUSP10/MDK/LOXL3/THY1/ARG2/PTPN11/CCL5/CD70/PRDM1/SLC7A1/SELENOK/EGR3/IL23A/IFNB1/IGFBP2/CEBPB/LGALS7B	37
BP	GO:0002474	antigen processing and presentation of peptide antigen via MHC class I	8/1121	28/18723	0.000170429	0.00459586	0.00346292	TAP1/B2M/HLA-E/HLA-B/HLA-F/HLA-C/HLA-A/HLA-H	8
BP	GO:0043254	regulation of protein-containing complex assembly	45/1121	428/18723	0.000173277	0.00465028	0.00350393	RAB3A/HSPA8/VEGFA/PINK1/TMOD1/BCL2L11/THRA/HSP90AA1/COTL1/MAPRE3/SOST/EIF4G1/SMAD6/PMEPA1/CLEC7A/NRG1/DNAJC15/LMO4/LGALS3/ISG15/SLIT2/NAV3/PIEZO1/SVIL/EPS8/ADD2/KIF14/TFRC/GSN/PREX1/FER/HCFC1/PPP2R5B/CKAP5/TPPP3/CDH5/MET/PTPN11/CCL26/TUBB4A/GNL3L/BIK/ABCA1/TMSB4X/MTLN	45
BP	GO:0045930	negative regulation of mitotic cell cycle	29/1121	235/18723	0.000175122	0.00465525	0.00350768	PLK1/BUB1B/DUSP1/SOX4/HMGA2/ZFP36L1/SPDL1/BTG2/KLF4/GTSE1/NACC2/CCL2/CDKN1A/SMAD3/BCL6/TICRR/CCND1/CENPF/BRCA1/BUB1/ZNF655/BRSK1/CLSPN/RBL1/CDKN1C/MDC1/PRKDC/BRCC3/EGFR	29
BP	GO:2000116	regulation of cysteine-type endopeptidase activity	29/1121	235/18723	0.000175122	0.00465525	0.00350768	TNFSF10/HSPD1/VEGFA/CAST/BCL2L11/KLF4/LGALS9/NR4A1/THBS1/CLEC7A/IFI6/MYC/SMAD3/PSMB9/BIRC5/MALT1/SFN/NLRP1/CASP1/GSN/AQP1/SOX2/F2R/GPER1/BEX3/BBC3/FAM162A/PRDX5/CARD16	29
BP	GO:0090278	negative regulation of peptide hormone secretion	10/1121	43/18723	0.00017763	0.00469965	0.00354113	SFRP1/SREBF1/MAP4K4/DRD2/PTPN11/VSNL1/IRS1/PIM3/FKBP1B/SIRT4	10
BP	GO:0045765	regulation of angiogenesis	38/1121	342/18723	0.000179432	0.00472504	0.00356026	SFRP1/SP100/ENPP2/VEGFA/HMGA2/SERPINE1/JUP/GLUL/STAT1/ADGRB2/KLF4/ITGA5/TGFBR2/SEMA6A/HIF1A/THBS1/DLL1/KDR/NRP1/RHOB/NINJ1/BRCA1/E2F2/MDK/EFNA1/AQP1/ETS1/KLF2/CDH5/ADAM12/PTN/WNT5A/EFNA3/CXCL8/CXCL10/RRAS/HIPK2/ADM	38
BP	GO:0001889	liver development	21/1121	147/18723	0.000181115	0.00474707	0.00357686	ADA/TYMS/PNPT1/AURKA/CAD/E2F8/HMGCS1/SMAD3/CCND1/ASS1/AK4/MDK/MESP1/DBP/KRT18/CPT1A/MET/PTN/MPST/EGFR/CEBPB	21
BP	GO:0048041	focal adhesion assembly	15/1121	87/18723	0.000186936	0.00487686	0.00367466	SFRP1/VEGFA/CORO1C/MAP4K4/THBS1/KDR/SMAD3/NRP1/MMP14/IQGAP1/THY1/LRP1/PTPN11/VCL/LIMCH1	15
BP	GO:0031102	neuron projection regeneration	12/1121	60/18723	0.000192864	0.0050024	0.00376925	NEFL/KLF4/MAP4K4/FLNA/DHFR/THY1/LRP1/PTN/GAP43/TSPO/ADM/FKBP1B	12
BP	GO:0046879	hormone secretion	34/1121	295/18723	0.000193532	0.0050024	0.00376925	SFRP1/C1QTNF1/OXCT1/SOX4/GLUL/SREBF1/MAP4K4/CAMK2N1/NLGN2/HIF1A/DRD2/EDN1/GIPR/LIF/TBX3/RAPGEF4/SELENOM/LRP1/NMB/CPT1A/PTPN11/CCL5/VSNL1/GPER1/IRS1/TCIRG1/ILDR2/IL11/EGFR/PIM3/ADM/FKBP1B/SIRT4/UCN	34
BP	GO:0070373	negative regulation of ERK1 and ERK2 cascade	14/1121	78/18723	0.000195899	0.00504037	0.00379786	EZR/DUSP1/KLF4/CAMK2N1/SEMA6A/ATF3/EIF3A/LIF/DUSP10/DUSP6/GBP1/TIMP3/GPER1/C1QL4	14
BP	GO:0007409	axonogenesis	44/1121	418/18723	0.000198422	0.00508195	0.00382919	RAB3A/UNC5B/HSP90AB1/LGR6/NEFL/VEGFA/NTNG2/TRIM46/EPHB4/NRXN3/GBX2/PLXNB3/HSP90AA1/SEMA6A/CDH4/ANK3/EGR2/DRD2/BOC/SLIT2/EFNB1/S100B/SEMA6B/NRP1/SEMA3B/EFNB3/EIF4G2/EFNA1/THY1/LRP1/BRSK1/EFNB2/PTPN11/VCL/WNT5A/S100A6/NEXN/NRCAM/EFNA3/GAP43/TSKU/TUBB2B/CRABP2/C12orf57	44
BP	GO:0048880	sensory system development	41/1121	381/18723	0.000203014	0.00517594	0.00390001	CALB1/RRM1/EFEMP1/VEGFA/MFN2/TMOD1/KLF4/TGFBR2/NF2/HIF1A/DLL1/ALDH1A3/MEIS3/DRD2/SMAD3/NRP1/RARG/JAG1/ACHE/SLC7A11/NAGLU/OSR2/ATF4/THY1/SOX2/VIM/SMARCD3/PTN/OBSL1/WNT5A/FKBP8/TCIRG1/PRDM1/TENM3/TSKU/HIPK2/SALL2/WNT6/CRYBA2/GDF3/C12orf57	41
BP	GO:0016049	cell growth	49/1121	482/18723	0.00020483	0.00519862	0.0039171	SESN2/SFRP1/HSP90AB1/SERPINE2/VEGFA/SGK1/IGFBP5/TRIM46/TAF9B/HSP90AA1/AURKA/IGFBP4/TGFBR2/SEMA6A/CLSTN3/CDH4/EIF4G1/SORBS2/NANOS1/CDKN1A/SMAD3/BCAR1/BCL6/BST2/EDN1/SLIT2/DNPH1/SEMA6B/NRP1/RARG/MMP14/SEMA3B/SFN/EIF4G2/KIF14/IQGAP1/LRP1/RGS2/VCL/WNT5A/OGFR/NRCAM/CXCL16/MSX1/LAMTOR2/KAZALD1/EGFR/CRABP2/UCN	49
BP	GO:0002792	negative regulation of peptide secretion	10/1121	44/18723	0.00021767	0.00547493	0.0041253	SFRP1/SREBF1/MAP4K4/DRD2/PTPN11/VSNL1/IRS1/PIM3/FKBP1B/SIRT4	10
BP	GO:0009262	deoxyribonucleotide metabolic process	10/1121	44/18723	0.00021767	0.00547493	0.0041253	RRM1/ADA/CMPK2/TYMS/RRM2/NEIL1/DNPH1/UPP1/NTHL1/NT5M	10
BP	GO:0001916	positive regulation of T cell mediated cytotoxicity	8/1121	29/18723	0.000223091	0.00558623	0.00420916	B2M/HLA-E/HLA-B/HLA-F/HLA-A/NECTIN2/HLA-H/IL23A	8
BP	GO:0051783	regulation of nuclear division	20/1121	139/18723	0.000231785	0.00577215	0.00434925	PLK1/BUB1B/DUSP1/SPDL1/CDCA2/RCC1/AURKA/DLGAP5/CDC20/NEK2/EDN1/ESPL1/LIF/CENPF/BUB1/MKI67/OBSL1/WNT5A/KIF20B/MSX1	20
BP	GO:0043010	camera-type eye development	36/1121	322/18723	0.000232574	0.00577215	0.00434925	CALB1/RRM1/EFEMP1/VEGFA/MFN2/TMOD1/KLF4/TGFBR2/NF2/HIF1A/DLL1/ALDH1A3/DRD2/SMAD3/NRP1/RARG/JAG1/ACHE/SLC7A11/NAGLU/OSR2/ATF4/THY1/VIM/SMARCD3/PTN/OBSL1/WNT5A/FKBP8/TCIRG1/TENM3/TSKU/HIPK2/WNT6/CRYBA2/C12orf57	36
BP	GO:0060326	cell chemotaxis	35/1121	310/18723	0.000233993	0.00578179	0.00435651	DUSP1/CXCL14/VEGFA/SERPINE1/PLXNB3/LGALS9/LPAR1/NR4A1/CSF1/CCL2/PARVA/THBS1/KDR/BCAR1/EDN1/LGALS3/SLIT2/NRP1/NINJ1/PREX1/MDK/MET/S1PR1/PTN/CCL5/WNT5A/SCG2/CCL26/CXCL16/ZNF580/CXCL8/CXCL10/EGR3/S100A7/TMSB4X	35
BP	GO:0014706	striated muscle tissue development	41/1121	384/18723	0.00023969	0.00587476	0.00442656	RCAN1/EGR1/FOS/CAV1/TPM1/VEGFA/ID2/BTG2/LY6E/HNRNPU/TGFBR2/NR4A1/HIVEP3/SORBS2/ATF3/DLL1/EGR2/NRG1/SMAD3/NUPR1/EDN1/ALPK2/S100B/IGSF8/SVIL/TBX3/KDM6B/CENPF/PKP2/MESP1/SIX4/DNER/S1PR1/RGS2/OBSL1/EFNB2/FLNB/WNT5A/MSX1/NEURL1/HOXD9	41
BP	GO:0001959	regulation of cytokine-mediated signaling pathway	21/1121	150/18723	0.000240898	0.00587476	0.00442656	OAS1/HSP90AB1/CAV1/AXL/USP18/NLRC5/IRAK1/CSF1/HIF1A/EDN1/ISG15/SLIT2/TXK/CASP1/PARP14/PTPN11/CCL5/MAVS/WNT5A/RNF113A/CARD16	21
BP	GO:0061008	hepaticobiliary system development	21/1121	150/18723	0.000240898	0.00587476	0.00442656	ADA/TYMS/PNPT1/AURKA/CAD/E2F8/HMGCS1/SMAD3/CCND1/ASS1/AK4/MDK/MESP1/DBP/KRT18/CPT1A/MET/PTN/MPST/EGFR/CEBPB	21
BP	GO:0034101	erythrocyte homeostasis	19/1121	129/18723	0.000242283	0.00588296	0.00443274	AXL/VEGFA/B2M/ZFP36L1/ID2/STAT1/THRA/SLC25A5/HIF1A/BCL6/ISG15/NCAPG2/P4HTM/ZFP36/ETS1/BPGM/KLF2/PRKDC/HIPK2	19
BP	GO:0003205	cardiac chamber development	22/1121	161/18723	0.000246345	0.00595582	0.00448764	TPM1/SOX4/LY6E/FGFRL1/TGFBR2/PARVA/HIF1A/SMAD6/NRG1/LMO4/SLIT2/CRELD1/NRP1/FOXF1/TBX3/JAG1/PKP2/MESP1/SMARCD3/WNT5A/DHRS3/PRDM1	22
BP	GO:0043620	regulation of DNA-templated transcription in response to stress	11/1121	53/18723	0.00025133	0.00605026	0.0045588	EGR1/SESN2/VEGFA/NEDD4/HIF1A/ATF3/JUN/ATF4/KLF2/TCIM/CEBPB	11
BP	GO:0002456	T cell mediated immunity	17/1121	109/18723	0.000253237	0.00607011	0.00457375	BTN3A2/HSPD1/B2M/HLA-E/IL7R/HLA-B/RSAD2/HLA-F/BTN3A3/MALT1/HLA-A/JAG1/NECTIN2/HLA-H/CD70/IL23A/IFNB1	17
BP	GO:0051303	establishment of chromosome localization	14/1121	80/18723	0.000258141	0.00616133	0.00464249	CDCA5/SPDL1/KPNB1/FAM83D/HNRNPU/DLGAP5/INCENP/CENPE/KIFC1/SPAG5/CDCA8/CENPF/KIF14/CHAMP1	14
BP	GO:0048863	stem cell differentiation	26/1121	206/18723	0.000259758	0.00617366	0.00465178	SFRP1/CORO1C/HMGA2/GBX2/HNRNPU/SEMA6A/PHF19/HIF1A/SLC4A11/NRG1/EDN1/MLLT3/EFNB1/SEMA6B/LIF/NRP1/SEMA3B/PRICKLE1/JAG1/NRTN/KRT18/PTN/PUS7/MSX1/PRKDC/NOLC1	26
BP	GO:0071456	cellular response to hypoxia	21/1121	151/18723	0.000264357	0.0062562	0.00471397	EGR1/SFRP1/CCNA2/VEGFA/PINK1/ZFP36L1/IRAK1/HIF1A/MYC/EDN1/S100B/NDNF/AK4/AQP1/PTN/FAM162A/HIPK2/ENDOG/MALAT1/SIRT4/CARD16	21
BP	GO:0007062	sister chromatid cohesion	12/1121	62/18723	0.000266577	0.0062562	0.00471397	PLK1/BUB1B/CDCA5/SFPQ/SGO2/CDC20/ESPL1/BUB1/STAG3L2/SMC1A/STAG1/ESCO1	12
BP	GO:0046824	positive regulation of nucleocytoplasmic transport	12/1121	62/18723	0.000266577	0.0062562	0.00471397	KHDRBS1/HSP90AB1/IPO5/JUP/DHX9/NEDD4/FLNA/SMAD3/SFN/TRIM28/ECT2/MAVS	12
BP	GO:0034612	response to tumor necrosis factor	30/1121	253/18723	0.00027599	0.00642336	0.00483993	SFRP1/GBP2/ZFP36L1/STAT1/DHX9/CCL2/AKAP12/THBS1/EDN1/ASS1/BRCA1/ARHGEF2/ZFP36/PRPF8/CASP1/NFKB1/KRT18/GBP1/KLF2/KRT8/GCH1/CCL5/CD70/GPER1/CCL26/CXCL16/CXCL8/ENDOG/TMSB4X/CARD16	30
BP	GO:0060828	regulation of canonical Wnt signaling pathway	30/1121	253/18723	0.00027599	0.00642336	0.00483993	EGR1/SFRP1/LGR6/CAV1/SOX4/JUP/NOTUM/NRARP/IGFBP4/SOST/TLE2/PLEKHA4/SMAD3/MLLT3/PRICKLE1/RPS12/MDK/NFKB1/MESP1/SOX2/LZTS2/ZNF703/ANKRD6/WNT5A/PPM1N/ASPM/TMEM88/EGFR/IGFBP2/BAMBI	30
BP	GO:0030218	erythrocyte differentiation	18/1121	120/18723	0.000277772	0.0064381	0.00485104	VEGFA/B2M/ZFP36L1/ID2/STAT1/THRA/SLC25A5/HIF1A/BCL6/ISG15/NCAPG2/P4HTM/ZFP36/ETS1/BPGM/KLF2/PRKDC/HIPK2	18
BP	GO:0045787	positive regulation of cell cycle	35/1121	313/18723	0.000281241	0.00647699	0.00488034	CDCA5/SFPQ/PLSCR1/BCL2L11/FAM83D/AURKA/HNRNPU/MAPRE3/DLGAP5/E2F8/EIF4G1/KIF23/DRD2/CHMP3/NUPR1/EDN1/SPAG5/FOSL1/ESPL1/USP22/CCND1/SVIL/TBX3/KIF14/HCFC1/ECT2/KIF3B/CIT/SMARCD3/TRIM21/PTPN11/WNT5A/KIF20B/MSX1/EGFR	35
BP	GO:0006913	nucleocytoplasmic transport	34/1121	301/18723	0.000282914	0.00647699	0.00488034	TXNIP/RANBP3L/KHDRBS1/MX2/SP100/HSP90AB1/IPO5/GLE1/JUP/KPNB1/DHX9/NOL6/NEDD4/BCL3/FLNA/EGR2/CDKN1A/SMAD3/NUP188/NUP98/MALT1/SFN/PRICKLE1/IFI27/TRIM28/ECT2/LZTS2/PTPN11/NDC1/MAVS/IPO7/NOLC1/NUP205/UHMK1	34
BP	GO:0051169	nuclear transport	34/1121	301/18723	0.000282914	0.00647699	0.00488034	TXNIP/RANBP3L/KHDRBS1/MX2/SP100/HSP90AB1/IPO5/GLE1/JUP/KPNB1/DHX9/NOL6/NEDD4/BCL3/FLNA/EGR2/CDKN1A/SMAD3/NUP188/NUP98/MALT1/SFN/PRICKLE1/IFI27/TRIM28/ECT2/LZTS2/PTPN11/NDC1/MAVS/IPO7/NOLC1/NUP205/UHMK1	34
BP	GO:2000106	regulation of leukocyte apoptotic process	14/1121	81/18723	0.000295163	0.00672996	0.00507095	ADA/AXL/IL7R/LGALS9/HIF1A/NOC2L/BCL6/LGALS3/TSC22D3/SLC7A11/EFNA1/ARG2/CCL5/WNT5A	14
BP	GO:0045089	positive regulation of innate immune response	19/1121	131/18723	0.000296381	0.00673037	0.00507125	SFPQ/NLRC5/PLSCR1/HLA-E/HSP90AA1/DHX9/HLA-F/CLEC7A/NMI/IFI35/TXK/NECTIN2/CCL5/MAVS/WNT5A/PRKDC/POLR3B/TRIM5/IFNB1	19
BP	GO:0034504	protein localization to nucleus	33/1121	290/18723	0.000301866	0.00682729	0.00514428	TXNIP/PLK1/SESN2/SP100/HSP90AB1/DKC1/IPO5/GBP2/JUP/GLUL/KPNB1/HNRNPU/BCL3/NF2/FLNA/CCT5/CDKN1A/SMAD3/NUP188/NUP98/LIF/PRICKLE1/ABCA7/POLR1A/TRIM28/TFRC/ECT2/SIX4/LZTS2/MAVS/IPO7/MSX1/NOLC1	33
BP	GO:0001704	formation of primary germ layer	18/1121	121/18723	0.000308408	0.00689946	0.00519866	DUSP1/ETS2/HMGA2/KLF4/ITGA5/TXNRD1/NF2/ITGB5/COL6A1/SMAD3/FOXF1/MMP14/KDM6B/MESP1/ATOH8/SOX2/WNT5A/COL12A1	18
BP	GO:0050709	negative regulation of protein secretion	13/1121	72/18723	0.000308747	0.00689946	0.00519866	SFRP1/SRCIN1/SREBF1/MAP4K4/RSAD2/DRD2/F2R/PTPN11/VSNL1/IRS1/PIM3/FKBP1B/SIRT4	13
BP	GO:0070227	lymphocyte apoptotic process	13/1121	72/18723	0.000308747	0.00689946	0.00519866	ADA/IL7R/BCL2L11/LGALS9/HIF1A/NOC2L/BCL6/LGALS3/TSC22D3/EFNA1/ARG2/CCL5/WNT5A	13
BP	GO:0042594	response to starvation	25/1121	197/18723	0.000310974	0.00692164	0.00521537	SESN2/SFRP1/HSPA8/OXCT1/MYBBP1A/SLC38A3/GLUL/AKR1C3/SREBF1/PRKAG2/CAD/ATF3/CDKN1A/DNAJC15/RRAGD/JUN/ZFP36/TFEB/ATF4/ITFG2/BRSK1/TBC1D5/MAP1LC3A/UPP1/ADM	25
BP	GO:0044706	multi-multicellular organism process	27/1121	220/18723	0.000315393	0.00698649	0.00526424	FOSB/FOS/SERPINE2/VEGFA/IGFBP5/SLC38A3/LGALS9/TGFBR2/TEAD3/CLDN4/CAD/JUNB/EPOR/EDN1/FOSL1/LIF/AKR1B1/TRIM28/ETS1/TPPP3/PTN/RGS2/PRDM1/DDO/IGFBP2/ADM/UCN	27
BP	GO:0042448	progesterone metabolic process	6/1121	17/18723	0.000317347	0.00698649	0.00526424	EGR1/AKR1C1/AKR1C3/AFP/AKR1C2/ADM	6
BP	GO:0150115	cell-substrate junction organization	16/1121	101/18723	0.000317624	0.00698649	0.00526424	SFRP1/VEGFA/CORO1C/MAP4K4/THBS1/KDR/SMAD3/NRP1/MMP14/IQGAP1/THY1/LRP1/PTPN11/VCL/LIMCH1/LAMTOR2	16
BP	GO:2000107	negative regulation of leukocyte apoptotic process	10/1121	46/18723	0.000320669	0.00700656	0.00527936	ADA/AXL/IL7R/HIF1A/NOC2L/BCL6/TSC22D3/EFNA1/ARG2/CCL5	10
BP	GO:0051090	regulation of DNA-binding transcription factor activity	45/1121	440/18723	0.000321035	0.00700656	0.00527936	DDX58/CTH/SP100/TRIM22/CAV1/VEGFA/SGK1/HMGA2/PINK1/NLRC5/ID2/JUP/IRAK1/KLF4/LGALS9/DHX9/BCL3/FLNA/CLEC7A/PELI1/SMAD3/NUPR1/EDN1/FOSL1/BEX1/MALT1/ARHGEF2/MAP3K10/TFRC/FER/ID1/TRIB1/PPP2R5B/RPS6KA4/ID3/TRIM21/MAVS/WNT5A/RHEBL1/PARP10/HIPK2/TRIM5/IKBKG/TMSB4X/CARD16	45
BP	GO:0050000	chromosome localization	14/1121	82/18723	0.000336645	0.00731876	0.0055146	CDCA5/SPDL1/KPNB1/FAM83D/HNRNPU/DLGAP5/INCENP/CENPE/KIFC1/SPAG5/CDCA8/CENPF/KIF14/CHAMP1	14
BP	GO:0050796	regulation of insulin secretion	22/1121	165/18723	0.000349753	0.00757439	0.00570721	SFRP1/OXCT1/SOX4/GLUL/SREBF1/MAP4K4/CAMK2N1/NLGN2/HIF1A/DRD2/GIPR/LRP1/CPT1A/PTPN11/CCL5/VSNL1/GPER1/IRS1/TCIRG1/PIM3/FKBP1B/SIRT4	22
BP	GO:0002230	positive regulation of defense response to virus by host	8/1121	31/18723	0.000368459	0.00794442	0.00598603	DDX58/APOBEC3F/APOBEC3G/STAT1/HSP90AA1/MAVS/SELENOK/IL23A	8
BP	GO:0001701	in utero embryonic development	39/1121	367/18723	0.000369673	0.00794442	0.00598603	PLPP4/ADA/VEGFA/ZFAND5/RRM2/ELF3/ZFP36L1/MFN2/LY6E/BCL2L11/MYH9/KLF4/TGFBR2/JUNB/E2F8/HIF1A/NEK2/SMAD3/EDN1/SMIM14/FOSL1/NCAPG2/LIF/FOXF1/TBX3/ETNK2/TFEB/TRIM28/GINS4/TTLL1/KLF2/KRT8/CIR1/PRDM1/MSX1/LPAR6/ADM/ENDOG/CEBPB	39
BP	GO:0001890	placenta development	20/1121	144/18723	0.000372966	0.00798461	0.00601631	HSP90AB1/ADA/ZFP36L1/JUNB/E2F8/HIF1A/EPOR/FOSL1/LIF/ETNK2/TFEB/TRIM28/CCNF/TPPP3/KRT8/PTN/PRDM1/ADM/CEBPB/ANG	20
BP	GO:0060560	developmental growth involved in morphogenesis	28/1121	234/18723	0.000374586	0.0079888	0.00601947	SFRP1/HSP90AB1/VEGFA/TRIM46/HSP90AA1/AURKA/TGFBR2/CSF1/SEMA6A/CDH4/SLIT2/SEMA6B/NRP1/RARG/SEMA3B/EIF4G2/TRIM28/MESP1/IQGAP1/SIX4/LRP1/LZTS2/S1PR1/VCL/WNT5A/KIF26B/NRCAM/CRABP2	28
BP	GO:0003231	cardiac ventricle development	18/1121	123/18723	0.000378589	0.00800172	0.00602921	TPM1/SOX4/LY6E/FGFRL1/TGFBR2/HIF1A/SMAD6/NRG1/LMO4/SLIT2/FOXF1/TBX3/JAG1/PKP2/MESP1/SMARCD3/WNT5A/PRDM1	18
BP	GO:0043491	protein kinase B signaling	26/1121	211/18723	0.000379164	0.00800172	0.00602921	SESN2/HSP90AB1/C1QTNF1/AXL/GDF15/IGFBP5/PINK1/ZFP36L1/AKR1C3/KLF4/HSP90AA1/PEAR1/CCL2/THBS1/KDR/MEIS3/DRD2/NRG1/AKR1C2/MET/CCL5/GPER1/IGF1R/PHLDA3/RRAS/EGFR	26
BP	GO:0036003	positive regulation of transcription from RNA polymerase II promoter in response to stress	7/1121	24/18723	0.00038026	0.00800172	0.00602921	SESN2/VEGFA/HIF1A/ATF3/ATF4/KLF2/CEBPB	7
BP	GO:0060538	skeletal muscle organ development	22/1121	166/18723	0.000380899	0.00800172	0.00602921	RCAN1/EGR1/FOS/CAV1/BTG2/FGFRL1/NR4A1/HIVEP3/ATF3/DLL1/EGR2/NUPR1/S100B/IGSF8/LARGE1/SVIL/ASS1/SIX4/DNER/FLNB/NEURL1/HOXD9	22
BP	GO:0043618	regulation of transcription from RNA polymerase II promoter in response to stress	10/1121	47/18723	0.000385748	0.00807336	0.00608318	EGR1/SESN2/VEGFA/NEDD4/HIF1A/ATF3/JUN/ATF4/KLF2/CEBPB	10
BP	GO:0001914	regulation of T cell mediated cytotoxicity	9/1121	39/18723	0.000396364	0.0082081	0.0061847	B2M/HLA-E/IL7R/HLA-B/HLA-F/HLA-A/NECTIN2/HLA-H/IL23A	9
BP	GO:0045823	positive regulation of heart contraction	9/1121	39/18723	0.000396364	0.0082081	0.0061847	ADA/TPM1/EDN1/ADRA1D/GCH1/RGS2/ADRA1B/ADM/UCN	9
BP	GO:0007589	body fluid secretion	15/1121	93/18723	0.000396576	0.0082081	0.0061847	CAV1/ADA/VEGFA/CAD/HIF1A/OAS2/KCNN4/EDN1/ZBTB7B/CCND1/AQP1/NEURL1/CELSR2/EGFR/UCN	15
BP	GO:0002027	regulation of heart rate	16/1121	103/18723	0.000398669	0.00822109	0.00619449	CAV1/ADA/TPM1/KCNE4/JUP/SREBF1/SCN4B/DRD2/EDN1/PKP2/ADRA1D/GCH1/KCND3/ADRA1B/ADM/FKBP1B	16
BP	GO:0052548	regulation of endopeptidase activity	44/1121	432/18723	0.0004066	0.00835392	0.00629458	SERPINE2/TNFSF10/HSPD1/VEGFA/CAST/SERPINE1/BCL2L11/KLF4/LGALS9/NR4A1/THBS1/CLEC7A/IFI6/MYC/SERPINB8/CRIM1/SMAD3/BST2/PSMB9/PSMB8/SERPINA5/BIRC5/PSME1/MALT1/SFN/NLRP1/ABCA2/CASP1/GSN/EFNA1/AQP1/SOX2/TIMP3/F2R/PCSK1N/GPER1/BEX3/EFNA3/BBC3/FAM162A/CD109/PRDX5/PSME2/CARD16	44
BP	GO:0031098	stress-activated protein kinase signaling cascade	29/1121	247/18723	0.000408321	0.00835867	0.00629816	EZR/SFRP1/DUSP1/VEGFA/FOXM1/PINK1/ZFP36L1/IRAK1/LGALS9/TPD52L1/MAP4K4/CLEC7A/MYC/SMAD3/GDF6/AKR1B1/ZFP36/MAP3K10/DUSP10/NFKB1/TRIB1/ANKRD6/WNT5A/MID1/IGF1R/RELL2/EGFR/HIPK2/MAGI3	29
BP	GO:0002711	positive regulation of T cell mediated immunity	11/1121	56/18723	0.000416471	0.00846372	0.00637731	HSPD1/B2M/HLA-E/HLA-B/RSAD2/HLA-F/MALT1/HLA-A/NECTIN2/HLA-H/IL23A	11
BP	GO:0071385	cellular response to glucocorticoid stimulus	11/1121	56/18723	0.000416471	0.00846372	0.00637731	ZFP36L1/FBXO32/BCL2L11/DDIT4/HNRNPU/EDN1/KLF9/ASS1/ZFP36/AQP1/EGFR	11
BP	GO:0002687	positive regulation of leukocyte migration	19/1121	135/18723	0.000436874	0.0088463	0.00666558	VEGFA/SERPINE1/LGALS9/CSF1/THBS1/JAM2/EDN1/LGALS3/MMP14/MDK/THY1/PTN/CCL5/WNT5A/ZNF580/CXCL8/CXCL10/SELENOK/S100A7	19
BP	GO:0051091	positive regulation of DNA-binding transcription factor activity	30/1121	260/18723	0.000440213	0.00888185	0.00669237	DDX58/CTH/TRIM22/CAV1/VEGFA/HMGA2/PINK1/JUP/IRAK1/LGALS9/DHX9/CLEC7A/SMAD3/EDN1/FOSL1/BEX1/MALT1/ARHGEF2/TFRC/FER/PPP2R5B/RPS6KA4/TRIM21/MAVS/WNT5A/RHEBL1/HIPK2/TRIM5/IKBKG/CARD16	30
BP	GO:1901991	negative regulation of mitotic cell cycle phase transition	23/1121	179/18723	0.000444688	0.00893997	0.00673617	PLK1/BUB1B/DUSP1/SOX4/HMGA2/ZFP36L1/SPDL1/KLF4/GTSE1/NACC2/CCL2/CDKN1A/TICRR/CCND1/CENPF/BRCA1/BUB1/ZNF655/BRSK1/CLSPN/RBL1/PRKDC/BRCC3	23
BP	GO:0002262	myeloid cell homeostasis	21/1121	157/18723	0.000451839	0.00901909	0.00679578	AXL/VEGFA/B2M/ZFP36L1/ID2/STAT1/BCL2L11/THRA/SLC25A5/HIF1A/BCL6/ISG15/NCAPG2/P4HTM/ZFP36/SLC7A11/ETS1/BPGM/KLF2/PRKDC/HIPK2	21
BP	GO:2000377	regulation of reactive oxygen species metabolic process	21/1121	157/18723	0.000451839	0.00901909	0.00679578	AKR1C1/STK17A/HSPD1/FOXM1/PINK1/NOXA1/AKR1C3/TGFBR2/HIF1A/THBS1/CLEC7A/CDKN1A/MYCN/SLC5A3/BRCA1/DHFR/ARG2/GCH1/TSPO/EGFR/ROMO1	21
BP	GO:0035767	endothelial cell chemotaxis	8/1121	32/18723	0.000465741	0.00921579	0.00694399	VEGFA/NR4A1/THBS1/KDR/NRP1/MET/EGR3/TMSB4X	8
BP	GO:0043122	regulation of I-kappaB kinase/NF-kappaB signaling	29/1121	249/18723	0.000466622	0.00921579	0.00694399	CTH/TRIM22/TNFSF10/SLC20A1/PINK1/CXXC5/IRAK1/STAT1/LGALS9/LPAR1/FLNA/S100A4/CLEC7A/PELI1/BST2/S100B/MALT1/CASP1/TFRC/ECT2/F2R/TRIM21/MAVS/WNT5A/PPM1N/LURAP1/TRIM5/IKBKG/CARD16	29
BP	GO:0046883	regulation of hormone secretion	29/1121	249/18723	0.000466622	0.00921579	0.00694399	SFRP1/C1QTNF1/OXCT1/SOX4/GLUL/SREBF1/MAP4K4/CAMK2N1/NLGN2/HIF1A/DRD2/EDN1/GIPR/LIF/LRP1/NMB/CPT1A/PTPN11/CCL5/VSNL1/GPER1/IRS1/TCIRG1/IL11/EGFR/PIM3/FKBP1B/SIRT4/UCN	29
BP	GO:0009306	protein secretion	38/1121	359/18723	0.00047159	0.00928123	0.0069933	RAB3A/EZR/SFRP1/OXCT1/SOX4/SRCIN1/GLUL/SREBF1/MAP4K4/CAMK2N1/RSAD2/NLGN2/HIF1A/KCNN4/DRD2/GIPR/ACHE/OLFM2/RAPGEF4/LRP1/F2R/CPT1A/PTPN11/CCL5/VSNL1/GPER1/SCG2/IRS1/SNCG/TCIRG1/ILDR2/EGFR/PIM3/ABCA1/FKBP1B/ARL4D/SIRT4/ANG	38
BP	GO:1900180	regulation of protein localization to nucleus	19/1121	136/18723	0.000479921	0.00941215	0.00709194	PLK1/SESN2/HSP90AB1/DKC1/IPO5/JUP/GLUL/NF2/FLNA/CCT5/SMAD3/LIF/POLR1A/TRIM28/TFRC/ECT2/LZTS2/MAVS/NOLC1	19
BP	GO:0030278	regulation of ossification	17/1121	115/18723	0.000482989	0.00942794	0.00710384	SFRP1/NOTUM/CSF1/SOST/HIF1A/RFLNB/SMAD6/EGR2/SMAD3/ISG15/MDK/OSR2/S1PR1/PTN/PTPN11/WNT5A/DHRS3	17
BP	GO:0006936	muscle contraction	37/1121	347/18723	0.000484088	0.00942794	0.00710384	ATP1B1/CAV1/TPM3/ADA/TPM1/KCNE4/STAC/KCNMA1/JUP/TMOD1/SYNM/SMTN/GRIP2/NR4A1/SCN4B/FLNA/DRD2/EDN1/MYOF/TBX3/PKP2/GSN/ARG2/F2R/GAA/RGS2/KCNJ8/GPER1/TNNT1/KCND3/ADRA1B/UTRN/GAMT/FKBP1B/C12orf57/TPM2/UCN	37
BP	GO:0010720	positive regulation of cell development	33/1121	298/18723	0.000492893	0.00956621	0.00720803	SERPINE2/NEFL/VEGFA/ID2/PLXNB3/AURKA/FLNA/HIF1A/CDH4/CLEC7A/EGR2/DRD2/SLIT2/LIF/NRP1/EIF4G2/PREX1/MDK/TRIB1/LRP1/CDH5/SMARCD3/PTN/S1PR2/OBSL1/RAC3/GPER1/TSPO/ASPM/PRKDC/NEURL1/EGFR/CRABP2	33
BP	GO:0035592	establishment of protein localization to extracellular region	38/1121	360/18723	0.000497671	0.00959297	0.00722819	RAB3A/EZR/SFRP1/OXCT1/SOX4/SRCIN1/GLUL/SREBF1/MAP4K4/CAMK2N1/RSAD2/NLGN2/HIF1A/KCNN4/DRD2/GIPR/ACHE/OLFM2/RAPGEF4/LRP1/F2R/CPT1A/PTPN11/CCL5/VSNL1/GPER1/SCG2/IRS1/SNCG/TCIRG1/ILDR2/EGFR/PIM3/ABCA1/FKBP1B/ARL4D/SIRT4/ANG	38
BP	GO:0009147	pyrimidine nucleoside triphosphate metabolic process	7/1121	25/18723	0.000501051	0.00959297	0.00722819	CMPK2/CTPS1/TYMS/CAD/ENTPD7/NME4/NME3	7
BP	GO:1903901	negative regulation of viral life cycle	7/1121	25/18723	0.000501051	0.00959297	0.00722819	IFITM1/LY6E/IFITM3/BST2/GSN/IFITM2/TRIM5	7
BP	GO:0007044	cell-substrate junction assembly	15/1121	95/18723	0.000501112	0.00959297	0.00722819	SFRP1/VEGFA/CORO1C/MAP4K4/THBS1/KDR/SMAD3/NRP1/MMP14/IQGAP1/THY1/LRP1/PTPN11/VCL/LIMCH1	15
BP	GO:0010639	negative regulation of organelle organization	37/1121	348/18723	0.000511315	0.00975498	0.00735026	PLK1/TPX2/BUB1B/DUSP1/PINK1/SPDL1/TMOD1/MCM2/HNRNPU/SLC25A5/CKAP2/NUPR1/VAT1/SLIT2/ESPL1/NAV3/SVIL/LIF/CENPF/EPS8/BRCA1/ARHGEF2/BUB1/ADD2/TFRC/GSN/MAP4/CCNF/CDH5/MET/S1PR1/PIF1/MID1/TSPO/TUBB4A/GNL3L/TMSB4X	37
BP	GO:0032640	tumor necrosis factor production	23/1121	181/18723	0.000521202	0.00987642	0.00744177	DDX58/OAS1/HSPD1/AXL/HLA-E/IFIH1/LGALS9/DHX9/BCL3/OAS2/AKAP12/THBS1/CLEC7A/ARHGEF2/ZFP36/ARG2/PTPN11/MAVS/WNT5A/TSPO/SELENOK/IL23A/LY96	23
BP	GO:0032680	regulation of tumor necrosis factor production	23/1121	181/18723	0.000521202	0.00987642	0.00744177	DDX58/OAS1/HSPD1/AXL/HLA-E/IFIH1/LGALS9/DHX9/BCL3/OAS2/AKAP12/THBS1/CLEC7A/ARHGEF2/ZFP36/ARG2/PTPN11/MAVS/WNT5A/TSPO/SELENOK/IL23A/LY96	23
BP	GO:0051403	stress-activated MAPK cascade	28/1121	239/18723	0.000527413	0.00992705	0.00747991	EZR/SFRP1/DUSP1/VEGFA/FOXM1/PINK1/ZFP36L1/IRAK1/LGALS9/TPD52L1/MAP4K4/CLEC7A/MYC/SMAD3/GDF6/ZFP36/MAP3K10/DUSP10/NFKB1/TRIB1/ANKRD6/WNT5A/MID1/IGF1R/RELL2/EGFR/HIPK2/MAGI3	28
BP	GO:0072593	reactive oxygen species metabolic process	28/1121	239/18723	0.000527413	0.00992705	0.00747991	AKR1C1/SESN2/STK17A/HSPD1/FOXM1/PINK1/NOXA1/AKR1C3/DDIT4/TGFBR2/HIF1A/THBS1/NCF2/CLEC7A/IFI6/CDKN1A/EDN1/MYCN/SLC5A3/BRCA1/DHFR/PREX1/ARG2/GCH1/TSPO/EGFR/PRDX5/ROMO1	28
BP	GO:0031100	animal organ regeneration	13/1121	76/18723	0.000532766	0.00999426	0.00753056	CCNA2/AXL/TYMS/PNPT1/AURKA/TGFBR2/CAD/CDKN1A/CCND1/CPT1A/EGFR/ADM/CEBPB	13
BP	GO:0007565	female pregnancy	24/1121	193/18723	0.000547468	0.0101981	0.00768412	FOSB/FOS/VEGFA/IGFBP5/SLC38A3/LGALS9/TGFBR2/TEAD3/CLDN4/CAD/JUNB/EPOR/FOSL1/LIF/AKR1B1/TRIM28/ETS1/TPPP3/PTN/RGS2/PRDM1/IGFBP2/ADM/UCN	24
BP	GO:0009409	response to cold	10/1121	49/18723	0.000549084	0.0101981	0.00768412	FOS/HSPD1/GMPR/THRA/HSP90AA1/SLC27A1/PCSK1N/METRNL/CXCL10/ADM	10
BP	GO:1902041	regulation of extrinsic apoptotic signaling pathway via death domain receptors	10/1121	49/18723	0.000549084	0.0101981	0.00768412	FAIM2/SFRP1/SP100/SERPINE1/ATF3/THBS1/LGALS3/BRCA1/ARHGEF2/TIMP3	10
BP	GO:0062197	cellular response to chemical stress	36/1121	337/18723	0.000553891	0.0102534	0.00772581	SESN2/FOS/CAV1/TPM1/AXL/SFPQ/PINK1/ZFP36L1/AKR1C3/PNPT1/KLF4/HIF1A/SLC4A11/RHOB/AKR1B1/KDM6B/JUN/ARHGEF2/DHFR/SLC7A11/FER/ATF4/ECT2/AQP1/ETS1/KLF2/MET/GCH1/PTPN11/MAP1LC3A/TSPO/ZNF580/EGFR/PRDX5/ENDOG/ROMO1	36
BP	GO:0035282	segmentation	15/1121	96/18723	0.000561657	0.010329	0.00778276	SFRP1/NRARP/WDR77/DLL1/EGR2/SMAD3/MLLT3/HES7/NRP1/FOXF1/TBX3/MESP1/WNT5A/PRKDC/DLL3	15
BP	GO:1904035	regulation of epithelial cell apoptotic process	15/1121	96/18723	0.000561657	0.010329	0.00778276	CAST/SERPINE1/ZFP36L1/AKR1C3/CCL2/THBS1/KDR/NUPR1/NDNF/ZFP36/GSN/MDK/CDH5/GPER1/SCG2	15
BP	GO:0050808	synapse organization	43/1121	426/18723	0.000567231	0.0103635	0.00780878	RAB3A/NEFL/HSPA8/NTNG2/CAST/SRCIN1/LZTS3/NEDD4/RAB17/CLSTN3/DLG4/PRRT1/NLGN2/FLNA/CDC20/EIF4G1/GLRB/ANK3/TUBB/DRD2/NRG1/AMIGO2/NRP1/PALM/ACHE/ADD2/SLC7A11/EFNA1/ADGRL1/SIX4/F2R/DNER/PTN/OBSL1/EFNB2/WNT5A/NRCAM/SNCG/IGF1R/GAP43/NEURL1/PPFIA3/C1QL1	43
BP	GO:1903131	mononuclear cell differentiation	43/1121	426/18723	0.000567231	0.0103635	0.00780878	EGR1/SFRP1/BATF2/ADA/SOX4/AXL/VEGFA/B2M/ZFP36L1/ID2/IL7R/HLA-B/MYH9/LGALS9/NRARP/TGFBR2/RSAD2/CSF1/BCL3/SLC25A5/MYC/DLL1/BCL6/ZBTB7B/MMP14/MALT1/JUN/DUSP10/PREX1/MDK/LOXL3/ITFG2/DNAJB9/ENTPD7/TCIRG1/PRDM1/PRKDC/IL11/EGR3/IL23A/IFNB1/PRTN3/CEBPB	43
BP	GO:0051098	regulation of binding	38/1121	363/18723	0.000583764	0.0105419	0.00794319	PLK1/SP100/HSP90AB1/IFIT2/IFIT1/CAV1/HMGA2/B2M/KLF4/AURKA/DHX9/MAPRE3/BCL3/EIF4G1/NEK2/CDKN1A/SMAD3/PBXIP1/LIF/NRP1/JUN/ADD2/TRIM28/ID1/GTF2B/LRP1/ZFP90/SMARCD3/MET/TRIM21/WNT5A/MSX1/GNL3L/LARP6/HIPK2/TMSB4X/CARD16/BAMBI	38
BP	GO:0051592	response to calcium ion	20/1121	149/18723	0.000583871	0.0105419	0.00794319	TXNIP/FOSB/FOS/DUSP1/CAV1/KCNMA1/AKR1C3/SYT12/NEDD4/JUNB/THBS1/EDN1/GIPR/CCND1/ECT2/IQGAP1/WNT5A/JUND/EGFR/ENDOG	20
BP	GO:0001953	negative regulation of cell-matrix adhesion	9/1121	41/18723	0.000588284	0.0105419	0.00794319	CORO1C/SERPINE1/MAP4K4/NF2/THBS1/BCL6/MMP14/JAG1/LRP1	9
BP	GO:0050691	regulation of defense response to virus by host	9/1121	41/18723	0.000588284	0.0105419	0.00794319	DDX58/APOBEC3F/APOBEC3G/STAT1/HSP90AA1/DHX9/MAVS/SELENOK/IL23A	9
BP	GO:0050856	regulation of T cell receptor signaling pathway	9/1121	41/18723	0.000588284	0.0105419	0.00794319	EZR/ADA/KCNN4/LGALS3/MALT1/THY1/NECTIN2/GBP1/IKBKG	9
BP	GO:1903524	positive regulation of blood circulation	9/1121	41/18723	0.000588284	0.0105419	0.00794319	ADA/TPM1/EDN1/ADRA1D/GCH1/RGS2/ADRA1B/ADM/UCN	9
BP	GO:0050777	negative regulation of immune response	24/1121	194/18723	0.00059015	0.0105419	0.00794319	OAS1/USP18/NLRC5/HLA-E/IL7R/HLA-B/LGALS9/HLA-F/DHX58/DRD2/BCL6/NMI/LGALS3/ISG15/ZBTB7B/FOXF1/HLA-A/DUSP10/FER/PARP14/LOXL3/ARG2/TRIM21/IFNB1	24
BP	GO:0071356	cellular response to tumor necrosis factor	27/1121	229/18723	0.000595465	0.010603	0.00798927	SFRP1/GBP2/ZFP36L1/STAT1/DHX9/CCL2/AKAP12/THBS1/EDN1/ASS1/BRCA1/ARHGEF2/ZFP36/PRPF8/CASP1/NFKB1/KRT18/GBP1/KLF2/KRT8/CCL5/CD70/GPER1/CCL26/CXCL8/TMSB4X/CARD16	27
BP	GO:0042770	signal transduction in response to DNA damage	22/1121	172/18723	0.000623785	0.0109623	0.00825998	PLK1/SESN2/SP100/SOX4/FOXM1/HMGA2/GTSE1/BCL3/CDKN1A/TICRR/CCND1/BRCA1/BRSK1/CLSPN/PTPN11/MDC1/ZNF385A/MSX1/PRKDC/BRCC3/HIPK2/FBXO6	22
BP	GO:1900182	positive regulation of protein localization to nucleus	14/1121	87/18723	0.000627003	0.0109623	0.00825998	PLK1/SESN2/HSP90AB1/DKC1/IPO5/JUP/FLNA/CCT5/SMAD3/LIF/TRIM28/TFRC/ECT2/MAVS	14
BP	GO:2000177	regulation of neural precursor cell proliferation	14/1121	87/18723	0.000627003	0.0109623	0.00825998	VEGFA/SHCBP1/SLC16A2/ID2/BTG2/NF2/FLNA/HIF1A/DRD2/MDK/SMARCD3/PTN/WNT5A/ASPM	14
BP	GO:0009148	pyrimidine nucleoside triphosphate biosynthetic process	6/1121	19/18723	0.000627367	0.0109623	0.00825998	CMPK2/CTPS1/TYMS/CAD/NME4/NME3	6
BP	GO:0045091	regulation of single stranded viral RNA replication via double stranded DNA intermediate	6/1121	19/18723	0.000627367	0.0109623	0.00825998	APOBEC3F/HMGA2/APOBEC3G/APOBEC3C/TRIM28/CXCL8	6
BP	GO:0046653	tetrahydrofolate metabolic process	6/1121	19/18723	0.000627367	0.0109623	0.00825998	TYMS/PIPOX/MTHFD1/DHFR/MTHFD1L/GCH1	6
BP	GO:0036294	cellular response to decreased oxygen levels	21/1121	161/18723	0.000633459	0.0110344	0.00831428	EGR1/SFRP1/CCNA2/VEGFA/PINK1/ZFP36L1/IRAK1/HIF1A/MYC/EDN1/S100B/NDNF/AK4/AQP1/PTN/FAM162A/HIPK2/ENDOG/MALAT1/SIRT4/CARD16	21
BP	GO:0030073	insulin secretion	24/1121	195/18723	0.000635707	0.0110393	0.00831795	SFRP1/OXCT1/SOX4/GLUL/SREBF1/MAP4K4/CAMK2N1/NLGN2/HIF1A/DRD2/GIPR/RAPGEF4/LRP1/CPT1A/PTPN11/CCL5/VSNL1/GPER1/IRS1/TCIRG1/ILDR2/PIM3/FKBP1B/SIRT4	24
BP	GO:0031349	positive regulation of defense response	31/1121	278/18723	0.000639951	0.0110787	0.00834764	HSPD1/SFPQ/NLRC5/PLSCR1/SERPINE1/HLA-E/HSP90AA1/DHX9/HLA-F/NEAT1/CLEC7A/NUPR1/NMI/IFI35/LDLR/TXK/NINJ1/MDK/ETS1/NECTIN2/CCL5/MAVS/WNT5A/PRKDC/POLR3B/EGFR/TRIM5/IL23A/IFNB1/CEBPB/UCN	31
BP	GO:0002790	peptide secretion	28/1121	242/18723	0.00064336	0.0111034	0.00836628	SFRP1/OXCT1/SOX4/GLUL/SREBF1/MAP4K4/CAMK2N1/NLGN2/HIF1A/DRD2/EDN1/GIPR/RAPGEF4/LRP1/CPT1A/PTPN11/CCL5/VSNL1/GPER1/IRS1/TCIRG1/ILDR2/EGFR/PIM3/ABCA1/FKBP1B/SIRT4/UCN	28
BP	GO:0001961	positive regulation of cytokine-mediated signaling pathway	10/1121	50/18723	0.000650047	0.0111844	0.00842731	AXL/NLRC5/CSF1/HIF1A/EDN1/TXK/CASP1/PARP14/MAVS/WNT5A	10
BP	GO:0050679	positive regulation of epithelial cell proliferation	25/1121	207/18723	0.000656393	0.0112299	0.00846159	SFRP1/VEGFA/GLUL/IQGAP3/PLXNB3/NRARP/NR4A1/HIF1A/MYC/KDR/CCND1/NRP1/MDK/OSR2/ID1/PTN/ZNF703/WNT5A/SCG2/CCL26/ZNF580/EGR3/EGFR/EGFL7/ANG	25
BP	GO:0048659	smooth muscle cell proliferation	23/1121	184/18723	0.000657466	0.0112299	0.00846159	TPM1/IGFBP5/ID2/MFN2/IRAK1/STAT1/KLF4/TGFBR2/THBS1/CDKN1A/EDN1/AKR1B1/JUN/TRIB1/EFEMP2/S1PR1/S1PR2/PTPN11/CCL5/GPER1/PRKDC/EGFR/ANG	23
BP	GO:0007162	negative regulation of cell adhesion	33/1121	303/18723	0.0006607	0.0112299	0.00846159	C1QTNF1/DUSP1/SERPINE2/TGFBI/VEGFA/CORO1C/SERPINE1/KLF4/PLXNB3/LGALS9/NRARP/MAP4K4/SEMA6A/NF2/THBS1/PELI1/BCL6/LGALS3/ZBTB7B/MMP14/ASS1/JAG1/MDK/LOXL3/GBP1/ARHGDIA/ARG2/LRP1/PTPN11/ZNF703/IFNB1/CEBPB/LGALS7B	33
BP	GO:0060070	canonical Wnt signaling pathway	33/1121	303/18723	0.0006607	0.0112299	0.00846159	EGR1/SFRP1/LGR6/CAV1/SOX4/JUP/KLF4/NOTUM/NRARP/IGFBP4/SOST/TLE2/PLEKHA4/SMAD3/MLLT3/RARG/PRICKLE1/RPS12/MDK/NFKB1/MESP1/SOX2/LZTS2/ZNF703/ANKRD6/WNT5A/PPM1N/ASPM/TMEM88/EGFR/WNT6/IGFBP2/BAMBI	33
BP	GO:0000910	cytokinesis	22/1121	173/18723	0.000675214	0.0114419	0.00862135	KIF20A/PLK1/KIF4A/ANLN/MYH9/AURKA/INCENP/E2F8/CKAP2/KIF23/ANK3/DRD2/CHMP3/ESPL1/SVIL/RHOB/KIF14/ECT2/KIF3B/CIT/LZTS2/KIF20B	22
BP	GO:0007093	mitotic cell cycle checkpoint signaling	18/1121	129/18723	0.000678231	0.01145	0.00862744	PLK1/BUB1B/DUSP1/SOX4/HMGA2/SPDL1/GTSE1/CDKN1A/TICRR/CCND1/CENPF/BRCA1/BUB1/BRSK1/CLSPN/MDC1/PRKDC/BRCC3	18
BP	GO:0043542	endothelial cell migration	31/1121	279/18723	0.000679773	0.01145	0.00862744	SP100/VEGFA/JUP/GLUL/EPHB4/MYH9/KLF4/NR4A1/HIF1A/THBS1/KDR/BCAR1/EDN1/SLIT2/NRP1/RHOB/EFNA1/ID1/ETS1/ATOH8/CDH5/MET/PTN/EFNB2/WNT5A/S100A2/SCG2/ZNF580/RRAS/EGR3/TMSB4X	31
BP	GO:0090276	regulation of peptide hormone secretion	24/1121	196/18723	0.000684297	0.0114917	0.00865884	SFRP1/OXCT1/SOX4/GLUL/SREBF1/MAP4K4/CAMK2N1/NLGN2/HIF1A/DRD2/GIPR/LRP1/CPT1A/PTPN11/CCL5/VSNL1/GPER1/IRS1/TCIRG1/EGFR/PIM3/FKBP1B/SIRT4/UCN	24
BP	GO:0048592	eye morphogenesis	20/1121	151/18723	0.000693472	0.0115926	0.00873491	CALB1/EFEMP1/VEGFA/MFN2/HIF1A/DLL1/ALDH1A3/RARG/JAG1/NAGLU/ATF4/THY1/PTN/OBSL1/WNT5A/PRDM1/TENM3/TSKU/HIPK2/C12orf57	20
BP	GO:0050878	regulation of body fluid levels	39/1121	379/18723	0.000694441	0.0115926	0.00873491	PABPC4/C1QTNF1/SERPINE2/CSRP1/CAV1/ADA/AXL/VEGFA/PLSCR1/SERPINE1/MYH9/SCNN1A/CLDN4/PEAR1/CAD/FLNA/HIF1A/OAS2/KCNN4/THBS1/DRD2/EDN1/ZBTB7B/TXK/CCND1/AKR1B1/SFN/AQP2/SLC7A11/AQP1/F2R/MET/VCL/NEURL1/CELSR2/EGFR/ADM/FA2H/UCN	39
BP	GO:1904029	regulation of cyclin-dependent protein kinase activity	15/1121	98/18723	0.000701623	0.0116778	0.00879906	PLK1/HSP90AB1/CCNA2/HERC5/IPO5/MAPRE3/CAMK2N1/CDKN1A/DIRAS3/CCND1/SFN/CCNF/CDKN1C/IPO7/EGFR	15
BP	GO:0032467	positive regulation of cytokinesis	9/1121	42/18723	0.000709461	0.0117733	0.00887102	KIF23/DRD2/CHMP3/SVIL/KIF14/ECT2/KIF3B/CIT/KIF20B	9
BP	GO:0016055	Wnt signaling pathway	44/1121	444/18723	0.000722203	0.0119213	0.00898253	EGR1/SFRP1/LGR6/CAV1/SOX4/JUP/KLF4/NOTUM/NRARP/IGFBP4/SOST/TLE2/PLEKHA4/DRD2/SMAD3/ALPK2/MLLT3/CCND1/PBXIP1/RARG/PRICKLE1/VANGL2/RPS12/MDK/NFKB1/MESP1/SOX2/LRP1/LZTS2/RAC3/ZNF703/ANKRD6/WNT5A/PPM1N/ASPM/VANGL1/CELSR2/TMEM88/TSKU/EGFR/FRAT2/WNT6/IGFBP2/BAMBI	44
BP	GO:0007095	mitotic G2 DNA damage checkpoint signaling	8/1121	34/18723	0.000722629	0.0119213	0.00898253	PLK1/HMGA2/CDKN1A/TICRR/BRCA1/BRSK1/CLSPN/BRCC3	8
BP	GO:0050708	regulation of protein secretion	30/1121	268/18723	0.000728777	0.011977	0.00902455	EZR/SFRP1/OXCT1/SOX4/SRCIN1/GLUL/SREBF1/MAP4K4/CAMK2N1/RSAD2/NLGN2/HIF1A/KCNN4/DRD2/GIPR/ACHE/LRP1/F2R/CPT1A/PTPN11/CCL5/VSNL1/GPER1/IRS1/TCIRG1/EGFR/PIM3/FKBP1B/SIRT4/ANG	30
BP	GO:0045619	regulation of lymphocyte differentiation	22/1121	174/18723	0.00073028	0.011977	0.00902455	SFRP1/ADA/SOX4/AXL/ZFP36L1/ID2/IL7R/LGALS9/NRARP/TGFBR2/BCL6/ZBTB7B/MMP14/MALT1/DUSP10/MDK/LOXL3/PRDM1/PRKDC/EGR3/IL23A/IFNB1	22
BP	GO:0090596	sensory organ morphogenesis	29/1121	256/18723	0.000732539	0.011979	0.00902607	CALB1/EFEMP1/VEGFA/MFN2/GBX2/HIF1A/DLL1/ALDH1A3/EDN1/PDZD7/WHRN/RARG/JAG1/NAGLU/OSR2/ATF4/THY1/SIX4/LRIG1/PTN/OBSL1/WNT5A/PRDM1/MSX1/TENM3/NKX3-2/TSKU/HIPK2/C12orf57	29
BP	GO:0010952	positive regulation of peptidase activity	24/1121	197/18723	0.000736087	0.0120021	0.00904342	TNFSF10/CAV1/HSPD1/PINK1/BCL2L11/LGALS9/CLDN4/CLEC7A/MYC/SMAD3/PSME1/MALT1/NLRP1/CASP1/GSN/EFNA1/F2R/GPER1/BEX3/EFNA3/BBC3/FAM162A/PCOLCE/PSME2	24
BP	GO:0050688	regulation of defense response to virus	12/1121	69/18723	0.000739579	0.012024	0.00905998	DDX58/IFIT1/APOBEC3F/HERC5/APOBEC3G/STAT1/HSP90AA1/DHX9/DHX58/MAVS/SELENOK/IL23A	12
BP	GO:0071692	protein localization to extracellular region	38/1121	368/18723	0.00075682	0.0122688	0.00924439	RAB3A/EZR/SFRP1/OXCT1/SOX4/SRCIN1/GLUL/SREBF1/MAP4K4/CAMK2N1/RSAD2/NLGN2/HIF1A/KCNN4/DRD2/GIPR/ACHE/OLFM2/RAPGEF4/LRP1/F2R/CPT1A/PTPN11/CCL5/VSNL1/GPER1/SCG2/IRS1/SNCG/TCIRG1/ILDR2/EGFR/PIM3/ABCA1/FKBP1B/ARL4D/SIRT4/ANG	38
BP	GO:0071706	tumor necrosis factor superfamily cytokine production	23/1121	186/18723	0.000764645	0.0122757	0.00924957	DDX58/OAS1/HSPD1/AXL/HLA-E/IFIH1/LGALS9/DHX9/BCL3/OAS2/AKAP12/THBS1/CLEC7A/ARHGEF2/ZFP36/ARG2/PTPN11/MAVS/WNT5A/TSPO/SELENOK/IL23A/LY96	23
BP	GO:1903555	regulation of tumor necrosis factor superfamily cytokine production	23/1121	186/18723	0.000764645	0.0122757	0.00924957	DDX58/OAS1/HSPD1/AXL/HLA-E/IFIH1/LGALS9/DHX9/BCL3/OAS2/AKAP12/THBS1/CLEC7A/ARHGEF2/ZFP36/ARG2/PTPN11/MAVS/WNT5A/TSPO/SELENOK/IL23A/LY96	23
BP	GO:0045668	negative regulation of osteoblast differentiation	10/1121	51/18723	0.000765846	0.0122757	0.00924957	RANBP3L/SFRP1/TOB1/IGFBP5/SMAD6/CRIM1/SMAD3/ID3/NOCT/BAMBI	10
BP	GO:0007249	I-kappaB kinase/NF-kappaB signaling	31/1121	281/18723	0.000765998	0.0122757	0.00924957	CTH/TRIM22/TNFSF10/SLC20A1/PINK1/CXXC5/IRAK1/STAT1/LGALS9/LPAR1/BCL3/FLNA/S100A4/CLEC7A/PELI1/BST2/S100B/MALT1/CASP1/TFRC/ECT2/F2R/TRIM21/MAVS/WNT5A/TBKBP1/PPM1N/LURAP1/TRIM5/IKBKG/CARD16	31
BP	GO:0198738	cell-cell signaling by wnt	44/1121	446/18723	0.000792021	0.0126524	0.00953343	EGR1/SFRP1/LGR6/CAV1/SOX4/JUP/KLF4/NOTUM/NRARP/IGFBP4/SOST/TLE2/PLEKHA4/DRD2/SMAD3/ALPK2/MLLT3/CCND1/PBXIP1/RARG/PRICKLE1/VANGL2/RPS12/MDK/NFKB1/MESP1/SOX2/LRP1/LZTS2/RAC3/ZNF703/ANKRD6/WNT5A/PPM1N/ASPM/VANGL1/CELSR2/TMEM88/TSKU/EGFR/FRAT2/WNT6/IGFBP2/BAMBI	44
BP	GO:0048593	camera-type eye morphogenesis	17/1121	120/18723	0.000794017	0.0126524	0.00953343	CALB1/VEGFA/MFN2/HIF1A/DLL1/ALDH1A3/JAG1/NAGLU/ATF4/THY1/PTN/OBSL1/WNT5A/TENM3/TSKU/HIPK2/C12orf57	17
BP	GO:0045637	regulation of myeloid cell differentiation	25/1121	210/18723	0.000810676	0.0128813	0.00970587	SFRP1/FOS/TMEM178A/B2M/ZFP36L1/ID2/STAT1/CSF1/HIF1A/MYC/DLL1/ISG15/P4HTM/LIF/RARG/EVI2B/JUN/ZFP36/JAG1/TCTA/ETS1/TRIB1/PRKDC/IL23A/CEBPB	25
BP	GO:0031348	negative regulation of defense response	29/1121	258/18723	0.00082957	0.0130837	0.0098584	OAS1/ADA/USP18/NLRC5/HLA-E/NT5E/HLA-B/KLF4/LGALS9/HLA-F/DHX58/DRD2/SMAD3/NMI/ISG15/LDLR/FOXF1/HLA-A/ZFP36/DUSP10/MDK/NFKB1/PARP14/ARG2/CDH5/TRIM21/GPER1/METRNL/SMPDL3B	29
BP	GO:0051402	neuron apoptotic process	28/1121	246/18723	0.000832361	0.0130837	0.0098584	UNC5B/FAIM2/HSP90AB1/NEFL/HSPD1/AXL/PINK1/BTG2/BCL2L11/AGAP2/TOX3/CCL2/HIF1A/NUPR1/NRP1/NDNF/NLRP1/JUN/KIF14/MDK/ATF4/SIX4/LRP1/F2R/CIT/FAM162A/HIPK2/CEBPB	28
BP	GO:0071216	cellular response to biotic stimulus	28/1121	246/18723	0.000832361	0.0130837	0.0098584	TXNIP/AXL/CMPK2/SERPINE1/IRAK1/BCL2L11/CCL2/CLEC7A/MALT1/ASS1/ZFP36/PRPF8/PLSCR4/CASP1/NFKB1/TRIB1/VIM/SMC1A/CCL5/WNT5A/TSPO/CXCL8/CXCL10/TRIM5/ABCA1/LY96/CEBPB/CARD16	28
BP	GO:0060333	interferon-gamma-mediated signaling pathway	7/1121	27/18723	0.000833248	0.0130837	0.0098584	SP100/HSP90AB1/NLRC5/STAT1/NMI/TXK/PARP14	7
BP	GO:0002698	negative regulation of immune effector process	16/1121	110/18723	0.000837412	0.0130837	0.0098584	HLA-E/IL7R/HLA-B/LGALS9/HLA-F/BCL6/BST2/LGALS3/ZBTB7B/FOXF1/HLA-A/DUSP10/FER/LOXL3/PRKDC/IFNB1	16
BP	GO:0007088	regulation of mitotic nuclear division	16/1121	110/18723	0.000837412	0.0130837	0.0098584	PLK1/BUB1B/DUSP1/SPDL1/CDCA2/RCC1/AURKA/DLGAP5/NEK2/EDN1/ESPL1/CENPF/BUB1/MKI67/OBSL1/KIF20B	16
BP	GO:0039692	single stranded viral RNA replication via double stranded DNA intermediate	6/1121	20/18723	0.000851157	0.0132615	0.00999239	APOBEC3F/HMGA2/APOBEC3G/APOBEC3C/TRIM28/CXCL8	6
BP	GO:0071496	cellular response to external stimulus	34/1121	320/18723	0.000855457	0.0132916	0.010015	SESN2/SFRP1/FOS/HSPA8/AXL/MYBBP1A/SLC38A3/GLUL/AKR1C3/SREBF1/PRKAG2/EIF4G1/ATF3/CDKN1A/DNAJC15/FOSL1/PIEZO1/RRAGD/AQP2/JUN/CASP1/TFEB/ATF4/NFKB1/AQP1/ITFG2/ARHGDIA/BRSK1/PTN/PTPN11/MAP1LC3A/UPP1/EGFR/UCN2	34
BP	GO:0061640	cytoskeleton-dependent cytokinesis	15/1121	100/18723	0.000870168	0.0134828	0.0101591	KIF20A/PLK1/KIF4A/ANLN/INCENP/CKAP2/KIF23/ANK3/CHMP3/ESPL1/RHOB/ECT2/CIT/LZTS2/KIF20B	15
BP	GO:0001569	branching involved in blood vessel morphogenesis	8/1121	35/18723	0.00088817	0.0136861	0.0103123	VEGFA/GBX2/NRARP/TGFBR2/KDR/EDN1/NRP1/MDK	8
BP	GO:0046640	regulation of alpha-beta T cell proliferation	8/1121	35/18723	0.00088817	0.0136861	0.0103123	HLA-E/LGALS9/TGFBR2/ZBTB7B/HLA-A/ARG2/IL23A/LGALS7B	8
BP	GO:0008360	regulation of cell shape	20/1121	154/18723	0.00089102	0.0136924	0.0103171	EZR/TPM1/VEGFA/MYH9/PLXNB3/LPAR1/CCL2/PARVA/RHOBTB3/KDR/S100B/RHOB/PALM/EPS8/ARHGDIA/PTN/RAC3/SHROOM3/FAM171A1/BAMBI	20
BP	GO:0030010	establishment of cell polarity	19/1121	143/18723	0.000897582	0.0137556	0.0103647	PLK1/HSP90AB1/SPDL1/MYH9/HSP90AA1/SPAG5/ALPK2/CYTH1/FOXF1/GSN/MAP4/SAPCD2/CDH5/BRSK1/DYNLT1/WNT5A/KIF26B/TCIRG1/KIF20B	19
BP	GO:0009410	response to xenobiotic stimulus	45/1121	462/18723	0.000905199	0.0138345	0.0104241	TXNIP/AKR1C1/FOSB/SFRP1/HSP90AB1/FOS/EFTUD2/HSPD1/ADA/OXCT1/CTPS1/TYMS/HMGA2/B2M/STAT1/SREBF1/TGFBR2/PFAS/CAD/SLC1A3/HMGCS1/MYC/DRD2/CDKN1A/EPHX1/EDN1/FOSL1/CA9/ASS1/AK4/CENPF/JUN/ABCA2/SMOX/TFRC/MDK/DUSP6/CPT1A/PTN/TSPO/EGFR/GSTM3/CYP2J2/IGFBP2/ABCA1	45
BP	GO:0002791	regulation of peptide secretion	24/1121	200/18723	0.00091243	0.0139071	0.0104788	SFRP1/OXCT1/SOX4/GLUL/SREBF1/MAP4K4/CAMK2N1/NLGN2/HIF1A/DRD2/GIPR/LRP1/CPT1A/PTPN11/CCL5/VSNL1/GPER1/IRS1/TCIRG1/EGFR/PIM3/FKBP1B/SIRT4/UCN	24
BP	GO:0071453	cellular response to oxygen levels	22/1121	177/18723	0.000919452	0.0139762	0.0105309	EGR1/SFRP1/CAV1/CCNA2/VEGFA/PINK1/ZFP36L1/IRAK1/HIF1A/MYC/EDN1/S100B/NDNF/AK4/AQP1/PTN/FAM162A/HIPK2/ENDOG/MALAT1/SIRT4/CARD16	22
BP	GO:0022604	regulation of cell morphogenesis	33/1121	309/18723	0.000926935	0.0140518	0.0105879	EZR/TPM1/ENPP2/VEGFA/CORO1C/NTNG2/MYH9/PLXNB3/LPAR1/CLDN4/CCL2/DLG4/FLNA/PARVA/RHOBTB3/KDR/S100B/NRP1/RHOB/PALM/EPS8/PREX1/MDK/GBP1/ARHGDIA/PTN/OBSL1/RAC3/WNT5A/SHROOM3/FAM171A1/PRKDC/BAMBI	33
BP	GO:0043523	regulation of neuron apoptotic process	25/1121	212/18723	0.000930243	0.014064	0.010597	UNC5B/FAIM2/HSP90AB1/NEFL/HSPD1/AXL/PINK1/BTG2/BCL2L11/AGAP2/TOX3/CCL2/HIF1A/NUPR1/NRP1/NDNF/JUN/KIF14/MDK/ATF4/SIX4/LRP1/F2R/HIPK2/CEBPB	25
BP	GO:0030072	peptide hormone secretion	27/1121	236/18723	0.000945168	0.0142512	0.0107381	SFRP1/OXCT1/SOX4/GLUL/SREBF1/MAP4K4/CAMK2N1/NLGN2/HIF1A/DRD2/EDN1/GIPR/RAPGEF4/LRP1/CPT1A/PTPN11/CCL5/VSNL1/GPER1/IRS1/TCIRG1/ILDR2/EGFR/PIM3/FKBP1B/SIRT4/UCN	27
BP	GO:0002688	regulation of leukocyte chemotaxis	17/1121	122/18723	0.00095944	0.0144276	0.010871	DUSP1/VEGFA/SERPINE1/LGALS9/CSF1/CCL2/THBS1/EDN1/SLIT2/MDK/PTN/CCL5/WNT5A/ZNF580/CXCL8/CXCL10/S100A7	17
BP	GO:0048562	embryonic organ morphogenesis	31/1121	285/18723	0.000967636	0.014444	0.0108834	EFEMP1/ID2/GBX2/TGFBR2/HIF1A/DLL1/ALDH1A3/SMAD3/EDN1/PDZD7/MYCN/WHRN/MTHFD1/RARG/FOXF1/MMP14/TBX3/VANGL2/NAGLU/OSR2/EFNA1/MESP1/SIX4/LRIG1/MTHFD1L/WNT5A/MSX1/NKX3-2/HOXB2/HIPK2/HOXD9	31
BP	GO:0000212	meiotic spindle organization	5/1121	14/18723	0.000968257	0.014444	0.0108834	MYH9/AURKA/ESPL1/TUBG2/ASPM	5
BP	GO:0060576	intestinal epithelial cell development	5/1121	14/18723	0.000968257	0.014444	0.0108834	TYMS/HIF1A/CDKN1A/PRDM1/NKX3-2	5
BP	GO:0009952	anterior/posterior pattern specification	24/1121	201/18723	0.000978826	0.014563	0.010973	SFRP1/ETS2/BTG2/GBX2/NRARP/AURKA/WDR77/DLL1/SMAD3/MLLT3/HES7/RARG/FOXF1/TBX3/MESP1/HES4/WNT5A/MSX1/PRKDC/HOXB2/CELSR2/HIPK2/HOXD9/DLL3	24
BP	GO:0014033	neural crest cell differentiation	14/1121	91/18723	0.000991594	0.01462	0.011016	SFRP1/CORO1C/GBX2/SEMA6A/HIF1A/NRG1/EDN1/EFNB1/SEMA6B/NRP1/SEMA3B/JAG1/NRTN/NOLC1	14
BP	GO:0051983	regulation of chromosome segregation	14/1121	91/18723	0.000991594	0.01462	0.011016	PLK1/BUB1B/DUSP1/PLSCR1/SPDL1/CDCA2/HNRNPU/DLGAP5/CENPE/ESPL1/CENPF/BUB1/MKI67/CDC26	14
BP	GO:0014032	neural crest cell development	13/1121	81/18723	0.000993087	0.01462	0.011016	CORO1C/GBX2/SEMA6A/HIF1A/NRG1/EDN1/EFNB1/SEMA6B/NRP1/SEMA3B/JAG1/NRTN/NOLC1	13
BP	GO:0044773	mitotic DNA damage checkpoint signaling	13/1121	81/18723	0.000993087	0.01462	0.011016	PLK1/SOX4/HMGA2/GTSE1/CDKN1A/TICRR/CCND1/BRCA1/BRSK1/CLSPN/MDC1/PRKDC/BRCC3	13
BP	GO:0010001	glial cell differentiation	26/1121	225/18723	0.00100482	0.0147539	0.0111169	SERPINE2/SOX4/ID2/KCNJ10/DLL1/EGR2/NRG1/LDLR/MYCN/S100B/LIF/ABCA2/LGI4/DUSP10/MDK/SOX2/LRP1/VIM/DNER/PTN/PTPN11/GAP43/EGFR/NAB2/MXRA8/FA2H	26
BP	GO:0062208	positive regulation of pattern recognition receptor signaling pathway	9/1121	44/18723	0.0010129	0.0148338	0.0111771	CAV1/OASL/SLC15A3/RSAD2/DHX58/PELI1/IFI35/NINJ1/DDX60	9
BP	GO:0009267	cellular response to starvation	20/1121	156/18723	0.00104807	0.015084	0.0113656	SESN2/SFRP1/HSPA8/MYBBP1A/SLC38A3/GLUL/AKR1C3/SREBF1/PRKAG2/ATF3/CDKN1A/DNAJC15/RRAGD/JUN/TFEB/ATF4/ITFG2/BRSK1/MAP1LC3A/UPP1	20
BP	GO:0090087	regulation of peptide transport	24/1121	202/18723	0.00104936	0.015084	0.0113656	SFRP1/OXCT1/SOX4/GLUL/SREBF1/MAP4K4/CAMK2N1/NLGN2/HIF1A/DRD2/GIPR/LRP1/CPT1A/PTPN11/CCL5/VSNL1/GPER1/IRS1/TCIRG1/EGFR/PIM3/FKBP1B/SIRT4/UCN	24
BP	GO:0050852	T cell receptor signaling pathway	17/1121	123/18723	0.0010526	0.015084	0.0113656	KHDRBS1/EZR/BTN3A2/ADA/BTN3A3/KCNN4/BCAR1/BTN3A1/LGALS3/TXK/MALT1/HLA-A/THEMIS2/THY1/NECTIN2/GBP1/IKBKG	17
BP	GO:0010460	positive regulation of heart rate	7/1121	28/18723	0.00105419	0.015084	0.0113656	ADA/TPM1/EDN1/ADRA1D/GCH1/ADRA1B/ADM	7
BP	GO:0010464	regulation of mesenchymal cell proliferation	7/1121	28/18723	0.00105419	0.015084	0.0113656	STAT1/TGFBR2/MYC/MYCN/FOXF1/PTN/WNT5A	7
BP	GO:0031342	negative regulation of cell killing	7/1121	28/18723	0.00105419	0.015084	0.0113656	HSP90AB1/HLA-E/IL7R/HLA-B/LGALS9/HLA-F/HLA-A	7
BP	GO:0032607	interferon-alpha production	7/1121	28/18723	0.00105419	0.015084	0.0113656	DDX58/HSPD1/IFIH1/STAT1/DHX9/NMI/MAVS	7
BP	GO:0032647	regulation of interferon-alpha production	7/1121	28/18723	0.00105419	0.015084	0.0113656	DDX58/HSPD1/IFIH1/STAT1/DHX9/NMI/MAVS	7
BP	GO:0090200	positive regulation of release of cytochrome c from mitochondria	7/1121	28/18723	0.00105419	0.015084	0.0113656	TNFSF10/PINK1/BCL2L11/GPER1/BBC3/FAM162A/BIK	7
BP	GO:0032147	activation of protein kinase activity	18/1121	134/18723	0.00106559	0.015202	0.0114545	TPX2/VEGFA/PINK1/IRAK1/TGFBR2/PRKAG2/AGAP2/DRD2/NRG1/MALT1/KIF14/ECT2/CLSPN/CCL5/WNT5A/IL23A/ANG/UCN	18
BP	GO:0006941	striated muscle contraction	22/1121	179/18723	0.00106785	0.015202	0.0114545	ATP1B1/CAV1/TPM1/KCNE4/STAC/JUP/SYNM/NR4A1/SCN4B/FLNA/PKP2/GSN/ARG2/GAA/RGS2/KCNJ8/TNNT1/KCND3/ADRA1B/FKBP1B/C12orf57/UCN	22
BP	GO:0008207	C21-steroid hormone metabolic process	8/1121	36/18723	0.00108277	0.0152595	0.0114978	EGR1/AKR1C1/AKR1C3/AFP/AKR1B1/AKR1C2/TSPO/ADM	8
BP	GO:0045746	negative regulation of Notch signaling pathway	8/1121	36/18723	0.00108277	0.0152595	0.0114978	NRARP/DLL1/BCL6/MMP14/CHAC1/NEURL1/EGFL7/TCIM	8
BP	GO:0051385	response to mineralocorticoid	8/1121	36/18723	0.00108277	0.0152595	0.0114978	FOSB/FOS/NEFL/CDKN1A/EDN1/FOSL1/CCND1/GPER1	8
BP	GO:0060338	regulation of type I interferon-mediated signaling pathway	8/1121	36/18723	0.00108277	0.0152595	0.0114978	OAS1/HSP90AB1/USP18/NLRC5/ISG15/PTPN11/MAVS/WNT5A	8
BP	GO:0001558	regulation of cell growth	41/1121	414/18723	0.00109173	0.0153259	0.0115479	SESN2/SFRP1/SERPINE2/VEGFA/SGK1/IGFBP5/TRIM46/TAF9B/IGFBP4/SEMA6A/CLSTN3/CDH4/EIF4G1/NANOS1/CDKN1A/SMAD3/BCAR1/BCL6/BST2/EDN1/SLIT2/DNPH1/SEMA6B/NRP1/MMP14/SEMA3B/SFN/EIF4G2/KIF14/LRP1/RGS2/WNT5A/OGFR/NRCAM/CXCL16/MSX1/LAMTOR2/KAZALD1/EGFR/CRABP2/UCN	41
BP	GO:0042246	tissue regeneration	12/1121	72/18723	0.00109295	0.0153259	0.0115479	LGR6/TGFBR2/CDKN1A/TXK/LARGE1/NINJ1/DUSP10/MDK/CPQ/SOX2/PTN/GAP43	12
BP	GO:0032465	regulation of cytokinesis	14/1121	92/18723	0.00110644	0.0154764	0.0116613	KIF20A/PLK1/AURKA/INCENP/E2F8/KIF23/DRD2/CHMP3/SVIL/KIF14/ECT2/KIF3B/CIT/KIF20B	14
BP	GO:0060395	SMAD protein signal transduction	13/1121	82/18723	0.00111676	0.0155819	0.0117408	FOS/TOB1/GDF15/SMAD6/AFP/SMAD3/GDF6/JUN/ATOH8/LRP1/VIM/HIPK2/GDF3	13
BP	GO:0060541	respiratory system development	24/1121	203/18723	0.00112425	0.0156115	0.0117631	RAB3A/ADA/VEGFA/IGFBP5/SREBF1/THRA/FGFRL1/TGFBR2/ALDH1A3/MYCN/LIF/RARG/FOXF1/MMP14/ASS1/SLC7A11/LOXL3/SIX4/KLF2/PTN/WNT5A/MAN1A2/EGFR/RIDA	24
BP	GO:0071347	cellular response to interleukin-1	16/1121	113/18723	0.00112445	0.0156115	0.0117631	EGR1/SFRP1/GBP2/IRAK1/CCL2/HIF1A/AKAP12/EDN1/NFKB1/RPS6KA4/GBP1/KLF2/CCL5/CCL26/CXCL8/CEBPB	16
BP	GO:0042454	ribonucleoside catabolic process	6/1121	21/18723	0.00113176	0.0156355	0.0117812	AHCY/APOBEC3F/ADA/APOBEC3G/APOBEC3C/UPP1	6
BP	GO:0046597	negative regulation of viral entry into host cell	6/1121	21/18723	0.00113176	0.0156355	0.0117812	IFITM1/LY6E/IFITM3/GSN/IFITM2/TRIM5	6
BP	GO:0001837	epithelial to mesenchymal transition	20/1121	157/18723	0.00113511	0.0156433	0.0117871	SFRP1/HMGA2/FAM83D/TGFBR2/FLNA/HIF1A/S100A4/RFLNB/SMAD3/TBX3/JAG1/TRIM28/MDK/EFNA1/LOXL3/ZNF703/WNT5A/MSX1/NOLC1/BAMBI	20
BP	GO:0007411	axon guidance	26/1121	227/18723	0.00114404	0.0157254	0.0118489	UNC5B/LGR6/VEGFA/EPHB4/NRXN3/GBX2/PLXNB3/SEMA6A/CDH4/EGR2/BOC/SLIT2/EFNB1/SEMA6B/NRP1/SEMA3B/EFNB3/EFNA1/LRP1/EFNB2/WNT5A/NEXN/NRCAM/EFNA3/GAP43/TUBB2B	26
BP	GO:0034599	cellular response to oxidative stress	31/1121	288/18723	0.00114791	0.0157254	0.0118489	SESN2/FOS/TPM1/AXL/SFPQ/PINK1/AKR1C3/PNPT1/KLF4/HIF1A/SLC4A11/RHOB/KDM6B/JUN/DHFR/SLC7A11/FER/ATF4/ECT2/AQP1/ETS1/KLF2/MET/GCH1/PTPN11/MAP1LC3A/ZNF580/EGFR/PRDX5/ENDOG/ROMO1	31
BP	GO:0048660	regulation of smooth muscle cell proliferation	22/1121	180/18723	0.00114948	0.0157254	0.0118489	TPM1/IGFBP5/ID2/MFN2/IRAK1/STAT1/KLF4/TGFBR2/THBS1/CDKN1A/EDN1/AKR1B1/JUN/TRIB1/EFEMP2/S1PR1/S1PR2/CCL5/GPER1/PRKDC/EGFR/ANG	22
BP	GO:1903829	positive regulation of cellular protein localization	30/1121	276/18723	0.00117141	0.0159865	0.0120456	PLK1/EZR/SESN2/HSP90AB1/DKC1/STAC/IPO5/PINK1/JUP/FLNA/CCT5/ANK3/SMAD3/LGALS3/LIF/SLC5A3/ABCA7/TRIM28/TFRC/ECT2/IQGAP1/LRP1/PTN/CEMIP/EPB41L2/GPER1/MAVS/BBC3/GNL3L/EGFR	30
BP	GO:0045639	positive regulation of myeloid cell differentiation	15/1121	103/18723	0.00118651	0.0161533	0.0121713	FOS/ZFP36L1/ID2/STAT1/CSF1/HIF1A/ISG15/LIF/EVI2B/JUN/JAG1/ETS1/TRIB1/PRKDC/IL23A	15
BP	GO:1901888	regulation of cell junction assembly	24/1121	204/18723	0.0012037	0.0163475	0.0123177	SFRP1/CAV1/VEGFA/CORO1C/NTNG2/MAP4K4/RAB17/CLSTN3/NLGN2/EIF4G1/THBS1/KDR/SMAD3/AMIGO2/NRP1/MMP14/IQGAP1/THY1/SIX4/LRP1/PTPN11/VCL/WNT5A/LIMCH1	24
BP	GO:1902893	regulation of pri-miRNA transcription by RNA polymerase II	10/1121	54/18723	0.0012189	0.0164852	0.0124214	EGR1/FOS/KLF4/HIF1A/SMAD6/SMAD3/FOSL1/JUN/ETS1/ATOH8	10
BP	GO:0097485	neuron projection guidance	26/1121	228/18723	0.00121971	0.0164852	0.0124214	UNC5B/LGR6/VEGFA/EPHB4/NRXN3/GBX2/PLXNB3/SEMA6A/CDH4/EGR2/BOC/SLIT2/EFNB1/SEMA6B/NRP1/SEMA3B/EFNB3/EFNA1/LRP1/EFNB2/WNT5A/NEXN/NRCAM/EFNA3/GAP43/TUBB2B	26
BP	GO:0008361	regulation of cell size	22/1121	181/18723	0.00123641	0.0166707	0.0125612	HSP90AB1/VEGFA/KCNMA1/TRIM46/IL7R/SLC12A7/IQGAP3/SEMA6A/CDH4/KCNN4/EDN1/SEMA6B/NRP1/RARG/SEMA3B/EIF4G2/AQP1/LRP1/WNT5A/NRCAM/CRABP2/UCN	22
BP	GO:0018212	peptidyl-tyrosine modification	38/1121	378/18723	0.00124338	0.0167244	0.0126017	SFRP1/CAV1/EFEMP1/AXL/ENPP2/VEGFA/SRCIN1/CNTN1/EPHB4/ITGA5/NF2/DLG4/CLEC7A/KDR/NRG1/TXK/NCAPG2/LIF/NRP1/TPST2/ARHGEF2/FER/EFNA1/PARP14/PPP2R5B/IQGAP1/THY1/ABL2/CADM4/MET/PTPN11/CCL5/IGF1R/IL11/NEURL1/EGFR/HIPK2/IL23A	38
BP	GO:0040013	negative regulation of locomotion	39/1121	391/18723	0.00124988	0.0167717	0.0126373	IFITM1/SFRP1/SP100/DUSP1/ADA/TPM1/CORO1C/IGFBP5/SERPINE1/JUP/KLF4/PLXNB3/SEMA6A/NF2/CCL2/THBS1/DRD2/NRG1/BST2/SLIT2/NAV3/SEMA6B/NRP1/RHOB/SEMA3B/JAG1/FRMD5/DUSP10/TRIB1/THY1/ARHGDIA/LRP1/PTN/S1PR2/VCL/WNT5A/LIMCH1/RRAS/ABHD2	39
BP	GO:0061053	somite development	13/1121	83/18723	0.00125303	0.0167739	0.0126389	SFRP1/NRARP/DLL1/SMAD3/HES7/MTHFD1/FOXF1/MESP1/LOXL3/SIX4/WNT5A/PRKDC/DLL3	13
BP	GO:0045727	positive regulation of translation	18/1121	136/18723	0.0012664	0.0168723	0.0127131	RBM3/KHDRBS1/TOB1/SOX4/PABPC1/PINK1/DHX9/BCL3/EIF4G1/THBS1/PPP1R15A/EIF4G2/VIM/CCL5/PRKDC/LARP6/UHMK1/UCN	18
BP	GO:0072073	kidney epithelium development	18/1121	136/18723	0.0012664	0.0168723	0.0127131	CALB1/SFRP1/VEGFA/STAT1/SMAD6/MYC/DLL1/SMAD3/SLIT2/LIF/JAG1/IQGAP1/SIX4/ARG2/LZTS2/KIF26B/POU3F3/WNT6	18
BP	GO:0001649	osteoblast differentiation	26/1121	229/18723	0.00129966	0.0172744	0.013016	IFITM1/RANBP3L/SFRP1/TOB1/MYBBP1A/IGFBP5/HNRNPU/DHX9/MRC2/JUNB/COL6A1/SMAD6/CRIM1/SMAD3/SNRNP200/JAG1/ACHE/ATF4/SOX2/ID3/VCAN/TCIRG1/JUND/NOCT/CEBPB/BAMBI	26
BP	GO:0030111	regulation of Wnt signaling pathway	34/1121	328/18723	0.00130919	0.0173075	0.013041	EGR1/SFRP1/LGR6/CAV1/SOX4/JUP/NOTUM/NRARP/IGFBP4/SOST/TLE2/PLEKHA4/SMAD3/ALPK2/MLLT3/PBXIP1/PRICKLE1/RPS12/MDK/NFKB1/MESP1/SOX2/LRP1/LZTS2/ZNF703/ANKRD6/WNT5A/PPM1N/ASPM/TMEM88/TSKU/EGFR/IGFBP2/BAMBI	34
BP	GO:0072529	pyrimidine-containing compound catabolic process	8/1121	37/18723	0.00130996	0.0173075	0.013041	APOBEC3F/APOBEC3G/APOBEC3C/NEIL1/ENTPD7/UPP1/NTHL1/NT5M	8
BP	GO:0045621	positive regulation of lymphocyte differentiation	15/1121	104/18723	0.00131141	0.0173075	0.013041	ADA/SOX4/AXL/IL7R/LGALS9/TGFBR2/BCL6/ZBTB7B/MMP14/MALT1/DUSP10/MDK/PRKDC/EGR3/IL23A	15
BP	GO:0010955	negative regulation of protein processing	7/1121	29/18723	0.00131863	0.0173213	0.0130514	SERPINE2/CAST/SERPINE1/THBS1/CHAC1/SIRT4/CARD16	7
BP	GO:1903318	negative regulation of protein maturation	7/1121	29/18723	0.00131863	0.0173213	0.0130514	SERPINE2/CAST/SERPINE1/THBS1/CHAC1/SIRT4/CARD16	7
BP	GO:0070542	response to fatty acid	11/1121	64/18723	0.0013428	0.0175976	0.0132596	AKR1C1/AKR1C3/SREBF1/EDN1/GIPR/LDLR/ASS1/AKR1C2/ID3/CPT1A/IRS1	11
BP	GO:0044839	cell cycle G2/M phase transition	19/1121	148/18723	0.00135981	0.0177789	0.0133962	KHDRBS1/PLK1/CCNA2/FOXM1/HMGA2/TPD52L1/AURKA/CDKN1A/TICRR/CCND1/CENPF/BRCA1/KIF14/BRSK1/SMARCD3/CLSPN/ATF5/BRCC3/FBXL15	19
BP	GO:0002690	positive regulation of leukocyte chemotaxis	14/1121	94/18723	0.00136979	0.0178678	0.0134632	VEGFA/SERPINE1/LGALS9/CSF1/THBS1/EDN1/MDK/PTN/CCL5/WNT5A/ZNF580/CXCL8/CXCL10/S100A7	14
BP	GO:0000086	G2/M transition of mitotic cell cycle	18/1121	137/18723	0.00137831	0.0178919	0.0134813	KHDRBS1/PLK1/CCNA2/FOXM1/HMGA2/TPD52L1/AURKA/CDKN1A/TICRR/CCND1/CENPF/BRCA1/KIF14/BRSK1/SMARCD3/CLSPN/BRCC3/FBXL15	18
BP	GO:1900153	positive regulation of nuclear-transcribed mRNA catabolic process, deadenylation-dependent decay	5/1121	15/18723	0.00138121	0.0178919	0.0134813	TOB1/PABPC1/ZFP36L1/NANOS1/ZFP36	5
BP	GO:2000052	positive regulation of non-canonical Wnt signaling pathway	5/1121	15/18723	0.00138121	0.0178919	0.0134813	SFRP1/PLEKHA4/MLLT3/ANKRD6/WNT5A	5
BP	GO:0007163	establishment or maintenance of cell polarity	25/1121	218/18723	0.00138515	0.0179016	0.0134887	PLK1/HSP90AB1/SPDL1/MYH9/HSP90AA1/PARVA/RHOBTB3/SPAG5/ALPK2/CYTH1/RHOB/FOXF1/GSN/MAP4/SAPCD2/AQP1/CKAP5/CDH5/BRSK1/RAC3/DYNLT1/WNT5A/KIF26B/TCIRG1/KIF20B	25
BP	GO:0006970	response to osmotic stress	13/1121	84/18723	0.00140286	0.0180889	0.0136297	HSP90AB1/KCNMA1/ZFP36L1/TSC22D4/SLC4A11/AKR1B1/TSC22D3/ARHGEF2/AQP1/TSPO/NOLC1/EGFR/MLC1	13
BP	GO:0043331	response to dsRNA	10/1121	55/18723	0.0014112	0.0181131	0.013648	DDX58/IFIT1/CAV1/IFIH1/DHX9/PELI1/NFKB1/KCNJ8/MAVS/IFNB1	10
BP	GO:0061614	pri-miRNA transcription by RNA polymerase II	10/1121	55/18723	0.0014112	0.0181131	0.013648	EGR1/FOS/KLF4/HIF1A/SMAD6/SMAD3/FOSL1/JUN/ETS1/ATOH8	10
BP	GO:0007611	learning or memory	28/1121	255/18723	0.00144274	0.0184756	0.0139211	RCAN1/CALB1/FOS/SGK1/B2M/BTG2/ASIC1/NRXN3/THRA/DLG4/PRRT1/HIF1A/EGR2/DRD2/FOSL1/LDLR/S100B/ABCA7/JUN/SLC7A11/MDK/BRSK1/PTN/FOXO6/EGFR/C1QL1/CEBPB/UCN	28
BP	GO:0070371	ERK1 and ERK2 cascade	34/1121	330/18723	0.00145107	0.0185399	0.0139696	EZR/DUSP1/ZFP36L1/IQGAP3/KLF4/LGALS9/FAM83D/CAMK2N1/SEMA6A/CCL2/ATF3/EIF3A/AKAP12/MYC/KDR/DRD2/NRG1/LIF/NRP1/ABCA7/DUSP10/DUSP6/GBP1/LRP1/TIMP3/F2R/PTPN11/CCL5/GPER1/CCL26/RRAS/EGFR/S100A7/C1QL4	34
BP	GO:0097191	extrinsic apoptotic signaling pathway	25/1121	219/18723	0.00147712	0.0186724	0.0140695	UNC5B/FAIM2/SFRP1/SP100/TNFSF10/CAV1/SERPINE1/BCL2L11/ATF3/THBS1/IFI6/SMAD3/MKNK2/LGALS3/NRP1/IFI27/BRCA1/ARHGEF2/KRT18/TIMP3/KRT8/CD70/GPER1/BEX3/SCG2	25
BP	GO:0002053	positive regulation of mesenchymal cell proliferation	6/1121	22/18723	0.00147808	0.0186724	0.0140695	STAT1/TGFBR2/MYC/MYCN/FOXF1/WNT5A	6
BP	GO:0016137	glycoside metabolic process	6/1121	22/18723	0.00147808	0.0186724	0.0140695	AKR1C1/AKR1C3/AKR1B1/AKR1C2/FUCA1/AKR1A1	6
BP	GO:0032727	positive regulation of interferon-alpha production	6/1121	22/18723	0.00147808	0.0186724	0.0140695	DDX58/HSPD1/IFIH1/STAT1/DHX9/MAVS	6
BP	GO:0051412	response to corticosterone	6/1121	22/18723	0.00147808	0.0186724	0.0140695	FOSB/FOS/NEFL/CDKN1A/FOSL1/CCND1	6
BP	GO:0001763	morphogenesis of a branching structure	23/1121	196/18723	0.00155818	0.019518	0.0147066	SFRP1/VEGFA/GBX2/NRARP/TGFBR2/CSF1/MYC/KDR/DRD2/EDN1/SLIT2/MYCN/NRP1/FOXF1/MMP14/TBX3/MDK/SIX4/MET/WNT5A/PRDM1/WNT6/ADM	23
BP	GO:0001656	metanephros development	13/1121	85/18723	0.00156727	0.019518	0.0147066	EGR1/CALB1/STAT1/MYC/GDF6/LIF/AKR1B1/AQP2/OSR2/ID3/SIX4/KIF26B/POU3F3	13
BP	GO:0002709	regulation of T cell mediated immunity	13/1121	85/18723	0.00156727	0.019518	0.0147066	HSPD1/B2M/HLA-E/IL7R/HLA-B/RSAD2/HLA-F/MALT1/HLA-A/NECTIN2/HLA-H/IL23A/IFNB1	13
BP	GO:0044774	mitotic DNA integrity checkpoint signaling	13/1121	85/18723	0.00156727	0.019518	0.0147066	PLK1/SOX4/HMGA2/GTSE1/CDKN1A/TICRR/CCND1/BRCA1/BRSK1/CLSPN/MDC1/PRKDC/BRCC3	13
BP	GO:0002573	myeloid leukocyte differentiation	24/1121	208/18723	0.00157178	0.019518	0.0147066	SFRP1/FOS/BATF2/TMEM178A/VEGFA/ZFP36L1/OSTM1/ID2/MYH9/TGFBR2/CSF1/JUNB/MYC/LIF/EVI2B/JUN/TCTA/TFRC/TRIB1/TCIRG1/CD109/IL23A/PRTN3/CEBPB	24
BP	GO:0046633	alpha-beta T cell proliferation	8/1121	38/18723	0.00157346	0.019518	0.0147066	HLA-E/LGALS9/TGFBR2/ZBTB7B/HLA-A/ARG2/IL23A/LGALS7B	8
BP	GO:0002696	positive regulation of leukocyte activation	40/1121	409/18723	0.00157538	0.019518	0.0147066	CAV1/HSPD1/ADA/SOX4/AXL/B2M/HLA-E/IL7R/LGALS9/TGFBR2/CCL2/HLA-F/THBS1/CLEC7A/PELI1/CDKN1A/BCL6/ZBTB7B/EFNB1/MMP14/MALT1/HLA-A/EFNB3/TFRC/DUSP10/MDK/THY1/NECTIN2/PTPN11/CCL5/CD70/KMT5C/WNT5A/JUND/PRKDC/SLC7A1/SELENOK/EGR3/IL23A/IGFBP2	40
BP	GO:0043627	response to estrogen	12/1121	75/18723	0.00157624	0.019518	0.0147066	SFRP1/CAV1/HSPD1/ARSB/TGFBR2/SMAD6/CCND1/MMP14/BRCA1/GSTM3/IGFBP2/ARID5A	12
BP	GO:0032535	regulation of cellular component size	38/1121	383/18723	0.00157633	0.019518	0.0147066	EZR/HSP90AB1/NEFL/VEGFA/KCNMA1/TRIM46/IL7R/SLC12A7/TMOD1/IQGAP3/COTL1/SEMA6A/CDH4/KCNN4/CHMP3/EDN1/SLIT2/SVIL/SEMA6B/NRP1/RARG/SEMA3B/PPP1R15A/EPS8/EIF4G2/ADD2/GSN/PREX1/FER/AQP1/LRP1/WNT5A/NRCAM/CCL26/PEX11G/CRABP2/TMSB4X/UCN	38
BP	GO:0071887	leukocyte apoptotic process	15/1121	106/18723	0.00159449	0.0196994	0.0148432	ADA/AXL/IL7R/BCL2L11/LGALS9/HIF1A/NOC2L/BCL6/LGALS3/TSC22D3/SLC7A11/EFNA1/ARG2/CCL5/WNT5A	15
BP	GO:0051653	spindle localization	10/1121	56/18723	0.00162745	0.0199889	0.0150614	PLK1/SPDL1/KPNB1/MYH9/SPAG5/ESPL1/MAP4/SAPCD2/DYNLT1/ASPM	10
BP	GO:0090175	regulation of establishment of planar polarity	10/1121	56/18723	0.00162745	0.0199889	0.0150614	SFRP1/PLEKHA4/MLLT3/PRICKLE1/VANGL2/SAPCD2/ANKRD6/WNT5A/VANGL1/CELSR2	10
BP	GO:0007389	pattern specification process	42/1121	436/18723	0.00163048	0.0199889	0.0150614	SFRP1/ETS2/BTG2/GBX2/NRARP/AURKA/TGFBR2/WDR77/HIF1A/SMAD6/DLL1/EGR2/MEIS3/SMAD3/EDN1/MLLT3/HES7/EFNB1/NRP1/RARG/FOXF1/TBX3/VANGL2/MESP1/KIF3B/SMARCD3/HES4/WNT5A/SHROOM3/FKBP8/MID1/MSX1/PRKDC/NKX3-2/HOXB2/CELSR2/HIPK2/HOXD9/SP8/WNT6/DLL3/FBXL15	42
BP	GO:0006221	pyrimidine nucleotide biosynthetic process	7/1121	30/18723	0.00163218	0.0199889	0.0150614	CMPK2/CTPS1/TYMS/CAD/UPP1/NME4/NME3	7
BP	GO:0045646	regulation of erythrocyte differentiation	9/1121	47/18723	0.0016572	0.0202511	0.015259	B2M/ZFP36L1/STAT1/HIF1A/ISG15/P4HTM/ZFP36/ETS1/PRKDC	9
BP	GO:0034250	positive regulation of cellular amide metabolic process	20/1121	162/18723	0.00166903	0.0203274	0.0153165	RBM3/KHDRBS1/TOB1/SOX4/PABPC1/PINK1/DHX9/BCL3/EIF4G1/THBS1/PPP1R15A/EIF4G2/ABCA2/EFNA1/VIM/CCL5/PRKDC/LARP6/UHMK1/UCN	20
BP	GO:0023061	signal release	44/1121	463/18723	0.0016707	0.0203274	0.0153165	RAB3A/SFRP1/C1QTNF1/OXCT1/SOX4/PINK1/GLUL/SREBF1/SYT12/ASIC1/NR4A1/MAP4K4/CAMK2N1/NLGN2/HIF1A/DRD2/EDN1/GIPR/LIF/TBX3/RAPGEF4/SELENOM/LRP1/NMB/F2R/CPT1A/BRSK1/PTPN11/CCL5/VSNL1/GPER1/IRS1/SNCG/TCIRG1/ILDR2/IL11/EGFR/PPFIA3/PIM3/ADM/ABCA1/FKBP1B/SIRT4/UCN	44
BP	GO:0071222	cellular response to lipopolysaccharide	24/1121	209/18723	0.00167761	0.0203673	0.0153465	AXL/CMPK2/SERPINE1/IRAK1/CCL2/MALT1/ASS1/ZFP36/PRPF8/PLSCR4/CASP1/NFKB1/TRIB1/VIM/CCL5/WNT5A/TSPO/CXCL8/CXCL10/TRIM5/ABCA1/LY96/CEBPB/CARD16	24
BP	GO:0071900	regulation of protein serine/threonine kinase activity	36/1121	359/18723	0.00171946	0.0208304	0.0156954	PLK1/SESN2/SFRP1/HSP90AB1/DUSP1/CAV1/CCNA2/HERC5/VEGFA/IPO5/HMGA2/IRAK1/TPD52L1/MAPRE3/PRKAG2/INCENP/SLC27A1/THBS1/CDKN1A/EDN1/DIRAS3/CCND1/SFN/MAP3K10/DUSP10/TRIB1/IQGAP1/THY1/CCNF/CEMIP/RGS2/WNT5A/CDKN1C/IPO7/EGFR/TCIM	36
BP	GO:0048754	branching morphogenesis of an epithelial tube	19/1121	151/18723	0.00172425	0.0208434	0.0157052	VEGFA/GBX2/NRARP/TGFBR2/CSF1/MYC/KDR/EDN1/SLIT2/MYCN/NRP1/FOXF1/MMP14/TBX3/MDK/SIX4/MET/WNT5A/WNT6	19
BP	GO:0045600	positive regulation of fat cell differentiation	11/1121	66/18723	0.00173919	0.0209342	0.0157737	SFRP1/ZFP36L1/ID2/HNRNPU/ZBTB7B/ZFP36/ZNF385A/METRNL/GDF3/NOCT/CEBPB	11
BP	GO:0014031	mesenchymal cell development	13/1121	86/18723	0.00174733	0.0209342	0.0157737	CORO1C/GBX2/SEMA6A/HIF1A/NRG1/EDN1/EFNB1/SEMA6B/NRP1/SEMA3B/JAG1/NRTN/NOLC1	13
BP	GO:0048864	stem cell development	13/1121	86/18723	0.00174733	0.0209342	0.0157737	CORO1C/GBX2/SEMA6A/HIF1A/NRG1/EDN1/EFNB1/SEMA6B/NRP1/SEMA3B/JAG1/NRTN/NOLC1	13
BP	GO:0031668	cellular response to extracellular stimulus	27/1121	246/18723	0.00174802	0.0209342	0.0157737	SESN2/SFRP1/FOS/HSPA8/AXL/MYBBP1A/SLC38A3/GLUL/AKR1C3/SREBF1/PRKAG2/EIF4G1/ATF3/CDKN1A/DNAJC15/FOSL1/RRAGD/AQP2/JUN/TFEB/ATF4/ITFG2/BRSK1/PTN/MAP1LC3A/UPP1/UCN2	27
BP	GO:0002824	positive regulation of adaptive immune response based on somatic recombination of immune receptors built from immunoglobulin superfamily domains	15/1121	107/18723	0.00175416	0.0209342	0.0157737	HSPD1/ADA/B2M/HLA-E/HLA-B/RSAD2/HLA-F/CLEC7A/MALT1/HLA-A/TFRC/NECTIN2/HLA-H/KMT5C/IL23A	15
BP	GO:0031532	actin cytoskeleton reorganization	15/1121	107/18723	0.00175416	0.0209342	0.0157737	EZR/MYH9/FLNA/PARVA/BCAR1/NRP1/EPS8/GSN/MDK/FER/ABL2/ARHGDIA/S1PR1/S1PR2/PDLIM4	15
BP	GO:0030177	positive regulation of Wnt signaling pathway	18/1121	140/18723	0.00176558	0.0210258	0.0158427	SFRP1/LGR6/CAV1/SOX4/JUP/NRARP/PLEKHA4/SMAD3/MLLT3/PBXIP1/RPS12/NFKB1/ANKRD6/WNT5A/PPM1N/ASPM/EGFR/BAMBI	18
BP	GO:0006809	nitric oxide biosynthetic process	12/1121	76/18723	0.00177189	0.0210562	0.0158656	HSP90AB1/CAV1/KLF4/HSP90AA1/CLEC7A/SMAD3/EDN1/ASS1/ARG2/KLF2/GCH1/TSPO	12
BP	GO:0003012	muscle system process	43/1121	452/18723	0.00183712	0.0217852	0.0164149	ATP1B1/CAV1/TPM3/ADA/TPM1/KCNE4/STAC/KCNMA1/IGFBP5/JUP/FBXO32/TMOD1/SYNM/KLF4/SMTN/GRIP2/LMCD1/NR4A1/SCN4B/FLNA/SORBS2/DRD2/SMAD3/EDN1/MYOF/TBX3/PKP2/GSN/ARG2/F2R/GAA/RGS2/KCNJ8/GPER1/TNNT1/KCND3/ADRA1B/UTRN/GAMT/FKBP1B/C12orf57/TPM2/UCN	43
BP	GO:0010463	mesenchymal cell proliferation	8/1121	39/18723	0.00187723	0.0222139	0.0167379	STAT1/TGFBR2/MYC/MYCN/FOXF1/PTN/WNT5A/MSX1	8
BP	GO:0051383	kinetochore organization	6/1121	23/18723	0.00189955	0.0223277	0.0168236	DLGAP5/CENPE/CENPN/SMC2/CENPF/SMC4	6
BP	GO:0042098	T cell proliferation	23/1121	199/18723	0.00190371	0.0223277	0.0168236	CTPS1/HLA-E/LGALS9/TGFBR2/PELI1/BTN3A1/LGALS3/ZBTB7B/EFNB1/MALT1/HLA-A/TFRC/ARG2/CCL5/CD70/SLC7A1/SELENOK/IL23A/IGFBP2/FKBP1B/PSMB10/CEBPB/LGALS7B	23
BP	GO:0006978	DNA damage response, signal transduction by p53 class mediator resulting in transcription of p21 class mediator	5/1121	16/18723	0.00191073	0.0223277	0.0168236	SP100/FOXM1/CDKN1A/ZNF385A/HIPK2	5
BP	GO:0045869	negative regulation of single stranded viral RNA replication via double stranded DNA intermediate	5/1121	16/18723	0.00191073	0.0223277	0.0168236	APOBEC3F/HMGA2/APOBEC3G/APOBEC3C/TRIM28	5
BP	GO:0070242	thymocyte apoptotic process	5/1121	16/18723	0.00191073	0.0223277	0.0168236	ADA/BCL2L11/HIF1A/EFNA1/WNT5A	5
BP	GO:2001224	positive regulation of neuron migration	5/1121	16/18723	0.00191073	0.0223277	0.0168236	SEMA6A/FLNA/ARHGEF2/MDK/KIF20B	5
BP	GO:0043410	positive regulation of MAPK cascade	45/1121	480/18723	0.00194523	0.0226835	0.0170918	C1QTNF1/VEGFA/GDF15/IRAK1/IQGAP3/LGALS9/LPAR1/TPD52L1/IGFBP4/CCL2/AKAP12/THBS1/CLEC7A/KDR/DRD2/NRG1/EDN1/GDF6/LIF/NRP1/ABCA7/MAP3K10/SHC2/EFNA1/IQGAP1/SOX2/LRP1/F2R/ADRA1D/PTPN11/CCL5/ANKRD6/GPER1/WNT5A/MID1/IGF1R/CCL26/LAMTOR2/IL11/RELL2/EGFR/HIPK2/ADRA1B/TRIM5/S100A7	45
BP	GO:0031331	positive regulation of cellular catabolic process	41/1121	427/18723	0.00195363	0.0227343	0.01713	PLK1/EZR/RNF19A/SESN2/HNRNPR/TRIM22/CAV1/TOB1/PABPC1/PINK1/ZFP36L1/BTG2/PNPT1/BCL2L11/HSP90AA1/AURKA/SLC25A5/USP13/CDC20/HIF1A/KDR/NANOS1/NUPR1/LDLR/PRICKLE1/ZFP36/ABCA2/TFEB/TRIB1/LRP1/CPT1A/TRIM21/IRS1/PLEKHF1/TRIM5/IKBKG/ENDOG/RIDA/PACSIN3/NOCT/MTLN	41
BP	GO:0009880	embryonic pattern specification	11/1121	67/18723	0.00197048	0.0227885	0.0171709	NRARP/WDR77/SMAD6/DLL1/MEIS3/SMAD3/EFNB1/NRP1/TBX3/MESP1/WNT5A	11
BP	GO:0061180	mammary gland epithelium development	11/1121	67/18723	0.00197048	0.0227885	0.0171709	ID2/IQGAP3/CSF1/HIF1A/CCND1/FOXF1/TBX3/ZNF703/WNT5A/MSX1/CEBPB	11
BP	GO:1903317	regulation of protein maturation	11/1121	67/18723	0.00197048	0.0227885	0.0171709	SERPINE2/SOX4/CAST/SERPINE1/MYH9/THBS1/MMP14/CHAC1/GSN/SIRT4/CARD16	11
BP	GO:0051251	positive regulation of lymphocyte activation	36/1121	362/18723	0.00198307	0.0228765	0.0172372	CAV1/HSPD1/ADA/SOX4/AXL/B2M/HLA-E/IL7R/LGALS9/TGFBR2/CCL2/HLA-F/CLEC7A/PELI1/CDKN1A/BCL6/ZBTB7B/EFNB1/MMP14/MALT1/HLA-A/EFNB3/TFRC/DUSP10/MDK/THY1/PTPN11/CCL5/CD70/KMT5C/PRKDC/SLC7A1/SELENOK/EGR3/IL23A/IGFBP2	36
BP	GO:0018108	peptidyl-tyrosine phosphorylation	37/1121	375/18723	0.00198625	0.0228765	0.0172372	SFRP1/CAV1/EFEMP1/AXL/ENPP2/VEGFA/SRCIN1/CNTN1/EPHB4/ITGA5/NF2/DLG4/CLEC7A/KDR/NRG1/TXK/NCAPG2/LIF/NRP1/ARHGEF2/FER/EFNA1/PARP14/PPP2R5B/IQGAP1/THY1/ABL2/CADM4/MET/PTPN11/CCL5/IGF1R/IL11/NEURL1/EGFR/HIPK2/IL23A	37
BP	GO:0090068	positive regulation of cell cycle process	26/1121	236/18723	0.00199675	0.0229027	0.0172569	CDCA5/SFPQ/PLSCR1/FAM83D/AURKA/HNRNPU/DLGAP5/E2F8/EIF4G1/KIF23/DRD2/CHMP3/EDN1/SPAG5/ESPL1/CCND1/SVIL/KIF14/ECT2/KIF3B/CIT/SMARCD3/WNT5A/KIF20B/MSX1/EGFR	26
BP	GO:0031063	regulation of histone deacetylation	7/1121	31/18723	0.00200077	0.0229027	0.0172569	VEGFA/PINK1/SREBF1/BCL6/ZBTB7B/NCAPG2/UCN	7
BP	GO:0034656	nucleobase-containing small molecule catabolic process	7/1121	31/18723	0.00200077	0.0229027	0.0172569	AHCY/APOBEC3F/ADA/APOBEC3G/APOBEC3C/ENTPD7/UPP1	7
BP	GO:0009396	folic acid-containing compound biosynthetic process	4/1121	10/18723	0.00200525	0.0229073	0.0172604	MTHFD1/DHFR/MTHFD1L/GCH1	4
BP	GO:0006575	cellular modified amino acid metabolic process	22/1121	188/18723	0.002018	0.023006	0.0173348	AHCY/TYMS/PLOD2/SLC16A2/PLSCR1/CPT1C/SLC27A1/CHDH/PIPOX/MTHFD1/ASS1/CHAC1/DHFR/SLC7A11/CPQ/MTHFD1L/CPT1A/GCH1/LPCAT4/GSTM3/GPX4/GAMT	22
BP	GO:0070301	cellular response to hydrogen peroxide	14/1121	98/18723	0.00205484	0.0233342	0.0175821	AXL/PINK1/KLF4/RHOB/KDM6B/ECT2/AQP1/ETS1/KLF2/MET/PTPN11/MAP1LC3A/ZNF580/ENDOG	14
BP	GO:0006417	regulation of translation	44/1121	468/18723	0.00205511	0.0233342	0.0175821	RBM3/KHDRBS1/SESN2/HNRNPR/ILF3/TOB1/SOX4/GLE1/NCL/TYMS/IGFBP5/PABPC1/PINK1/ZFP36L1/BTG2/EIF4A2/PNPT1/DHX9/BCL3/EIF4G1/THBS1/NANOS1/MKNK2/ENC1/GEMIN5/PPP1R15A/ZFP36/EIF4G2/DHFR/ATF4/VIM/RGS2/CCL5/PUS7/ZNF385A/PRKDC/NOLC1/LARP6/NEURL1/UHMK1/RIDA/NOCT/ANG/UCN	44
BP	GO:1901988	negative regulation of cell cycle phase transition	27/1121	249/18723	0.00208174	0.0235888	0.0177739	PLK1/BUB1B/DUSP1/SOX4/HMGA2/ZFP36L1/SPDL1/KLF4/GTSE1/NACC2/CCL2/CDKN1A/TICRR/CCND1/CENPF/BRCA1/BUB1/ZNF655/BRSK1/CLSPN/ATF5/PTPN11/RBL1/MDC1/PRKDC/BRCC3/FBXO6	27
BP	GO:0046683	response to organophosphorus	17/1121	131/18723	0.00211383	0.0239042	0.0180115	AKR1C1/FOSB/EZR/FOS/DUSP1/HSPD1/TYMS/IGFBP5/ZFP36L1/STAT1/SREBF1/PNPT1/FOSL1/ASS1/JUN/CASP1/AQP1	17
BP	GO:0046578	regulation of Ras protein signal transduction	22/1121	189/18723	0.0021582	0.0243569	0.0183526	PSD4/FOXM1/MFN2/LPAR1/MAP4K4/CSF1/NRG1/BCL6/CYTH1/NRP1/EPS8/ARHGEF2/KIF14/ABL2/ARHGDIA/F2R/CADM4/MET/DYNLT1/LPAR6/ABCA1/SH2B2	22
BP	GO:0009394	2'-deoxyribonucleotide metabolic process	8/1121	40/18723	0.0022254	0.0247829	0.0186737	ADA/CMPK2/TYMS/NEIL1/DNPH1/UPP1/NTHL1/NT5M	8
BP	GO:0045429	positive regulation of nitric oxide biosynthetic process	8/1121	40/18723	0.0022254	0.0247829	0.0186737	HSP90AB1/KLF4/HSP90AA1/CLEC7A/SMAD3/EDN1/ASS1/KLF2	8
BP	GO:0071526	semaphorin-plexin signaling pathway	8/1121	40/18723	0.0022254	0.0247829	0.0186737	PLXNB3/SEMA6A/FLNA/SEMA6B/NRP1/SEMA3B/ARHGDIA/MET	8
BP	GO:0032922	circadian regulation of gene expression	11/1121	68/18723	0.00222617	0.0247829	0.0186737	EGR1/PPP1CB/ID4/MYBBP1A/ID2/HNRNPU/DRD2/ATF4/ID1/ID3/NOCT	11
BP	GO:0060411	cardiac septum morphogenesis	11/1121	68/18723	0.00222617	0.0247829	0.0186737	SOX4/FGFRL1/TGFBR2/PARVA/SMAD6/SLIT2/NRP1/TBX3/JAG1/WNT5A/DHRS3	11
BP	GO:0070555	response to interleukin-1	18/1121	143/18723	0.00224082	0.0247829	0.0186737	EGR1/SFRP1/GBP2/IRAK1/LGALS9/CCL2/HIF1A/AKAP12/EDN1/NFKB1/ETS1/RPS6KA4/GBP1/KLF2/CCL5/CCL26/CXCL8/CEBPB	18
BP	GO:0001913	T cell mediated cytotoxicity	9/1121	49/18723	0.00224456	0.0247829	0.0186737	B2M/HLA-E/IL7R/HLA-B/HLA-F/HLA-A/NECTIN2/HLA-H/IL23A	9
BP	GO:0009066	aspartate family amino acid metabolic process	9/1121	49/18723	0.00224456	0.0247829	0.0186737	PLOD2/ADI1/PIPOX/MTHFD1/ASS1/NAT8L/ATF4/DDO/RIDA	9
BP	GO:0021695	cerebellar cortex development	9/1121	49/18723	0.00224456	0.0247829	0.0186737	FAIM2/SERPINE2/DLL1/WHRN/NAGLU/KIF14/MDK/TTLL1/PTPN11	9
BP	GO:0030857	negative regulation of epithelial cell differentiation	9/1121	49/18723	0.00224456	0.0247829	0.0186737	CAV1/VEGFA/STAT1/DLL1/CCND1/TBX3/JAG1/ID1/GDF3	9
BP	GO:0048168	regulation of neuronal synaptic plasticity	9/1121	49/18723	0.00224456	0.0247829	0.0186737	RAB3A/DLG4/KCNJ10/EGR2/DRD2/SYNGR1/S100B/NEURL1/PPFIA3	9
BP	GO:0097193	intrinsic apoptotic signaling pathway	30/1121	288/18723	0.00226767	0.024989	0.0188289	CAV1/MYBBP1A/SFPQ/PINK1/BCL2L11/DDIT4/TAF9B/BCL3/NACC2/HIF1A/IFI6/NOC2L/CDKN1A/NUPR1/SFN/PPP1R15A/CHAC1/BRCA1/ARHGEF2/E2F2/ATF4/ZNF385A/BBC3/MSX1/PHLDA3/PRKDC/PLEKHF1/SELENOK/HIPK2/CEBPB	30
BP	GO:0051216	cartilage development	22/1121	190/18723	0.00230658	0.025342	0.0190949	EFEMP1/TGFBI/TYMS/HMGA2/THRA/TGFBR2/HIF1A/RFLNB/SMAD3/EDN1/GDF6/MYCN/PBXIP1/RARG/MDK/OSR2/PTPN11/THBS3/WNT5A/MSX1/NKX3-2/TSKU	22
BP	GO:0042063	gliogenesis	31/1121	301/18723	0.00230875	0.025342	0.0190949	SERPINE2/SOX4/ID2/CSF1/NF2/CCL2/KCNJ10/DLL1/EGR2/NRG1/LDLR/MYCN/S100B/LIF/MMP14/ABCA2/LGI4/DUSP10/MDK/SOX2/LRP1/VIM/DNER/PTN/PTPN11/GAP43/TSPO/EGFR/NAB2/MXRA8/FA2H	31
BP	GO:0007519	skeletal muscle tissue development	19/1121	155/18723	0.00233597	0.0255907	0.0192823	RCAN1/EGR1/FOS/CAV1/BTG2/NR4A1/HIVEP3/ATF3/DLL1/EGR2/NUPR1/S100B/IGSF8/SVIL/SIX4/DNER/FLNB/NEURL1/HOXD9	19
BP	GO:0030900	forebrain development	37/1121	379/18723	0.00238399	0.0260485	0.0196273	NEFL/RRM1/AXL/B2M/ID2/BTG2/GBX2/NF2/FLNA/HIF1A/APLP1/ALDH1A3/DRD2/NRG1/SLIT2/SEMA6B/NRP1/TBX3/NDNF/KDM6B/SLC7A11/KIF14/MDK/AQP1/ETS1/SOX2/LRP1/ATF5/PTN/RAC3/WNT5A/MSX1/TACC1/ASPM/TSKU/POU3F3/C12orf57	37
BP	GO:0031346	positive regulation of cell projection organization	35/1121	353/18723	0.00238705	0.0260485	0.0196273	NEFL/ANLN/ENPP2/VEGFA/CORO1C/CNTN1/ARSB/GPC2/PLXNB3/NEGR1/DLG4/FLNA/CDH4/SLIT2/NRP1/ENC1/NDNF/PALM/EPS8/EIF4G2/MDK/PPP2R5B/IQGAP1/ABL2/LRP1/PTN/RGS2/OBSL1/DYNLT1/WNT5A/TENM3/NEURL1/FKBP1B/CRABP2/MIEN1	35
BP	GO:0001911	negative regulation of leukocyte mediated cytotoxicity	6/1121	24/18723	0.00240598	0.0261534	0.0197063	HLA-E/IL7R/HLA-B/LGALS9/HLA-F/HLA-A	6
BP	GO:0009219	pyrimidine deoxyribonucleotide metabolic process	6/1121	24/18723	0.00240598	0.0261534	0.0197063	CMPK2/TYMS/NEIL1/UPP1/NTHL1/NT5M	6
BP	GO:0001836	release of cytochrome c from mitochondria	10/1121	59/18723	0.00244166	0.0264899	0.0199598	TNFSF10/PINK1/BCL2L11/IFI6/SFN/JUN/GPER1/BBC3/FAM162A/BIK	10
BP	GO:0046887	positive regulation of hormone secretion	17/1121	133/18723	0.00248761	0.0269363	0.0202962	C1QTNF1/OXCT1/SOX4/GLUL/CAMK2N1/NLGN2/HIF1A/DRD2/EDN1/GIPR/LRP1/NMB/PTPN11/VSNL1/GPER1/EGFR/UCN	17
BP	GO:0001764	neuron migration	19/1121	156/18723	0.00251458	0.0271759	0.0204767	AXL/VEGFA/NTNG2/TRIM46/DDIT4/SEMA6A/FLNA/DRD2/NRG1/NRP1/NDNF/ARHGEF2/MDK/DNER/NRCAM/KIF20B/ASPM/CELSR2/TUBB2B	19
BP	GO:0001938	positive regulation of endothelial cell proliferation	15/1121	111/18723	0.00253237	0.0273155	0.0205819	VEGFA/PLXNB3/NRARP/NR4A1/HIF1A/KDR/NRP1/MDK/WNT5A/SCG2/CCL26/ZNF580/EGR3/EGFL7/ANG	15
BP	GO:0034329	cell junction assembly	40/1121	420/18723	0.00254828	0.0273818	0.0206318	SFRP1/CAV1/VEGFA/CORO1C/NTNG2/JUP/MAP4K4/CLDN4/RAB17/CLSTN3/NLGN2/EIF4G1/THBS1/KDR/DRD2/NRG1/SMAD3/AMIGO2/NRP1/MMP14/PKP2/ACHE/ADD2/ECT2/IQGAP1/THY1/SIX4/LRP1/CDH10/CDH5/DNER/OBSL1/EFNB2/PTPN11/ZNF703/VCL/WNT5A/NRCAM/GAP43/LIMCH1	40
BP	GO:0050867	positive regulation of cell activation	40/1121	420/18723	0.00254828	0.0273818	0.0206318	CAV1/HSPD1/ADA/SOX4/AXL/B2M/HLA-E/IL7R/LGALS9/TGFBR2/CCL2/HLA-F/THBS1/CLEC7A/PELI1/CDKN1A/BCL6/ZBTB7B/EFNB1/MMP14/MALT1/HLA-A/EFNB3/TFRC/DUSP10/MDK/THY1/NECTIN2/PTPN11/CCL5/CD70/KMT5C/WNT5A/JUND/PRKDC/SLC7A1/SELENOK/EGR3/IL23A/IGFBP2	40
BP	GO:0021692	cerebellar Purkinje cell layer morphogenesis	5/1121	17/18723	0.00257464	0.0274368	0.0206733	FAIM2/DLL1/WHRN/KIF14/TTLL1	5
BP	GO:0042772	DNA damage response, signal transduction resulting in transcription	5/1121	17/18723	0.00257464	0.0274368	0.0206733	SP100/FOXM1/CDKN1A/ZNF385A/HIPK2	5
BP	GO:0048532	anatomical structure arrangement	5/1121	17/18723	0.00257464	0.0274368	0.0206733	DLL1/EGR2/NRP1/KIF14/HOXB2	5
BP	GO:0060644	mammary gland epithelial cell differentiation	5/1121	17/18723	0.00257464	0.0274368	0.0206733	ID2/HIF1A/FOXF1/ZNF703/CEBPB	5
BP	GO:0002822	regulation of adaptive immune response based on somatic recombination of immune receptors built from immunoglobulin superfamily domains	20/1121	168/18723	0.00257785	0.0274368	0.0206733	HSPD1/ADA/B2M/HLA-E/IL7R/HLA-B/RSAD2/HLA-F/CLEC7A/BCL6/ZBTB7B/MALT1/HLA-A/TFRC/LOXL3/NECTIN2/HLA-H/KMT5C/IL23A/IFNB1	20
BP	GO:0007080	mitotic metaphase plate congression	9/1121	50/18723	0.00259458	0.0275624	0.020768	CDCA5/SPDL1/KPNB1/HNRNPU/CENPE/KIFC1/CDCA8/KIF14/CHAMP1	9
BP	GO:0010721	negative regulation of cell development	21/1121	180/18723	0.00261491	0.0276472	0.0208319	VEGFA/CORO1C/B2M/TRIM46/SEMA6A/RFLNB/LDLR/MYCN/SEMA6B/NRP1/SEMA3B/EFNB3/DUSP10/ID1/THY1/GBP1/PTN/DYNLT1/WNT5A/TSPO/DLL3	21
BP	GO:0007178	transmembrane receptor protein serine/threonine kinase signaling pathway	35/1121	355/18723	0.00261984	0.0276472	0.0208319	EGR1/SFRP1/HSP90AB1/FOS/CAV1/TOB1/GDF15/TGFBR2/ITGB5/SOST/SMAD6/THBS1/PMEPA1/AFP/CRIM1/SMAD3/GDF6/JUN/ID1/ATOH8/LRP1/VIM/CDH5/ZNF703/WNT5A/CDKN1C/FKBP8/PEG10/MSX1/HIPK2/CD109/C20orf27/GDF3/FBXL15/BAMBI	35
BP	GO:0042307	positive regulation of protein import into nucleus	8/1121	41/18723	0.00262227	0.0276472	0.0208319	HSP90AB1/IPO5/JUP/FLNA/SMAD3/TRIM28/ECT2/MAVS	8
BP	GO:1904407	positive regulation of nitric oxide metabolic process	8/1121	41/18723	0.00262227	0.0276472	0.0208319	HSP90AB1/KLF4/HSP90AA1/CLEC7A/SMAD3/EDN1/ASS1/KLF2	8
BP	GO:0034109	homotypic cell-cell adhesion	13/1121	90/18723	0.00264695	0.0278423	0.0209789	C1QTNF1/SERPINE2/CSRP1/JUP/MYH9/PEAR1/FLNA/ANK3/PKP2/SLC7A11/ZNF703/CCL5/VCL	13
BP	GO:0032943	mononuclear cell proliferation	30/1121	291/18723	0.0026507	0.0278423	0.0209789	HSPD1/ADA/CTPS1/HLA-E/IL7R/LGALS9/TGFBR2/CSF1/PELI1/CDKN1A/BCL6/BTN3A1/LGALS3/ZBTB7B/EFNB1/MALT1/HLA-A/TFRC/ARG2/CCL5/CD70/SLC7A1/SELENOK/IL23A/IFNB1/IGFBP2/FKBP1B/PSMB10/CEBPB/LGALS7B	30
BP	GO:0090287	regulation of cellular response to growth factor stimulus	31/1121	304/18723	0.00268804	0.0281817	0.0212346	SFRP1/HSP90AB1/CAV1/TOB1/ITGA5/NEDD4/SEMA6A/SOST/HIF1A/SMAD6/THBS1/PMEPA1/DLL1/CRIM1/SMAD3/SLIT2/PPP2R5B/CDH5/CADM4/ZNF703/WNT5A/CDKN1C/FKBP8/PEG10/MSX1/HIPK2/CD109/C20orf27/GDF3/FBXL15/BAMBI	31
BP	GO:0000075	cell cycle checkpoint signaling	20/1121	169/18723	0.0027638	0.0288387	0.0217296	PLK1/BUB1B/DUSP1/SOX4/HMGA2/SPDL1/GTSE1/CDKN1A/TICRR/CCND1/CENPF/BRCA1/BUB1/BRSK1/CLSPN/PTPN11/MDC1/PRKDC/BRCC3/FBXO6	20
BP	GO:0048145	regulation of fibroblast proliferation	12/1121	80/18723	0.00276407	0.0288387	0.0217296	SFRP1/CCNA2/DHX9/MYC/CDKN1A/NUPR1/AQP1/WNT5A/S100A6/PRKDC/PARP10/C1QL4	12
BP	GO:0002821	positive regulation of adaptive immune response	15/1121	112/18723	0.00276613	0.0288387	0.0217296	HSPD1/ADA/B2M/HLA-E/HLA-B/RSAD2/HLA-F/CLEC7A/MALT1/HLA-A/TFRC/NECTIN2/HLA-H/KMT5C/IL23A	15
BP	GO:0030071	regulation of mitotic metaphase/anaphase transition	10/1121	60/18723	0.00277599	0.0288879	0.0217667	PLK1/BUB1B/DUSP1/SPDL1/DLGAP5/CENPE/ESPL1/CENPF/BUB1/CDC26	10
BP	GO:0070661	leukocyte proliferation	32/1121	318/18723	0.0028509	0.0296124	0.0223126	HSPD1/ADA/CTPS1/HLA-E/IL7R/LGALS9/TGFBR2/CSF1/PELI1/CDKN1A/BCL6/BST2/BTN3A1/LGALS3/ZBTB7B/EFNB1/MALT1/HLA-A/TFRC/ARG2/CCL5/CD70/TCIRG1/SLC7A1/SELENOK/IL23A/IFNB1/IGFBP2/FKBP1B/PSMB10/CEBPB/LGALS7B	32
BP	GO:0021700	developmental maturation	29/1121	280/18723	0.00289005	0.0299636	0.0225772	RAB3A/NEFL/AXL/VEGFA/TYMS/AURKA/WDR77/DLG4/CDC20/HIF1A/RFLNB/CLEC7A/CDKN1A/AKR1B1/PALM/LGI4/KIF14/ADGRL1/KLF2/CDH5/S1PR1/RAC3/THBS3/WNT5A/NRCAM/NEURL1/ABHD2/C1QL1/ANG	29
BP	GO:0021696	cerebellar cortex morphogenesis	7/1121	33/18723	0.00292804	0.03019	0.0227478	FAIM2/SERPINE2/DLL1/WHRN/KIF14/TTLL1/PTPN11	7
BP	GO:0070570	regulation of neuron projection regeneration	7/1121	33/18723	0.00292804	0.03019	0.0227478	KLF4/MAP4K4/FLNA/THY1/LRP1/PTN/FKBP1B	7
BP	GO:1902275	regulation of chromatin organization	7/1121	33/18723	0.00292804	0.03019	0.0227478	SSRP1/HNRNPU/MLLT3/TRIM28/MKI67/LMNTD2/PARP10	7
BP	GO:0032970	regulation of actin filament-based process	38/1121	397/18723	0.00295262	0.0302859	0.0228201	SFRP1/CAV1/TPM1/JUP/TMOD1/IQGAP3/MYH9/LPAR1/COTL1/NF2/FLNA/RHOBTB3/SMAD3/BST2/EDN1/SLIT2/SVIL/NRP1/RHOB/EPS8/PKP2/ADD2/GSN/PREX1/MDK/FER/ECT2/ID1/IQGAP1/ABL2/ARHGDIA/LRP1/MET/S1PR1/RAC3/CCL26/LIMCH1/TMSB4X	38
BP	GO:0030178	negative regulation of Wnt signaling pathway	20/1121	170/18723	0.00296086	0.0302859	0.0228201	EGR1/SFRP1/CAV1/NOTUM/IGFBP4/SOST/TLE2/ALPK2/MLLT3/PRICKLE1/MDK/MESP1/SOX2/LRP1/LZTS2/ANKRD6/WNT5A/TMEM88/TSKU/IGFBP2	20
BP	GO:0008016	regulation of heart contraction	23/1121	206/18723	0.00297143	0.0302859	0.0228201	ATP1B1/CAV1/ADA/TPM1/KCNE4/JUP/SREBF1/THRA/SCN4B/FLNA/DRD2/EDN1/PKP2/GAA/ADRA1D/GCH1/RGS2/KCND3/ADRA1B/CYP2J2/ADM/FKBP1B/UCN	23
BP	GO:0051293	establishment of spindle localization	9/1121	51/18723	0.00298645	0.0302859	0.0228201	PLK1/SPDL1/KPNB1/MYH9/SPAG5/ESPL1/MAP4/SAPCD2/DYNLT1	9
BP	GO:0061138	morphogenesis of a branching epithelium	21/1121	182/18723	0.00298717	0.0302859	0.0228201	SFRP1/VEGFA/GBX2/NRARP/TGFBR2/CSF1/MYC/KDR/EDN1/SLIT2/MYCN/NRP1/FOXF1/MMP14/TBX3/MDK/SIX4/MET/WNT5A/WNT6/ADM	21
BP	GO:1902749	regulation of cell cycle G2/M phase transition	14/1121	102/18723	0.00300175	0.0302859	0.0228201	PLK1/HMGA2/AURKA/CDKN1A/TICRR/CCND1/CENPF/BRCA1/KIF14/BRSK1/SMARCD3/CLSPN/ATF5/BRCC3	14
BP	GO:0033197	response to vitamin E	4/1121	11/18723	0.00300258	0.0302859	0.0228201	ADA/HMGCS1/CCND1/FKBP1B	4
BP	GO:0048680	positive regulation of axon regeneration	4/1121	11/18723	0.00300258	0.0302859	0.0228201	FLNA/LRP1/PTN/FKBP1B	4
BP	GO:0070243	regulation of thymocyte apoptotic process	4/1121	11/18723	0.00300258	0.0302859	0.0228201	ADA/HIF1A/EFNA1/WNT5A	4
BP	GO:0072697	protein localization to cell cortex	4/1121	11/18723	0.00300258	0.0302859	0.0228201	PLK1/EZR/SAPCD2/EPB41L2	4
BP	GO:1902667	regulation of axon guidance	4/1121	11/18723	0.00300258	0.0302859	0.0228201	VEGFA/SLIT2/NRP1/TUBB2B	4
BP	GO:0010996	response to auditory stimulus	6/1121	25/18723	0.00300754	0.0302859	0.0228201	SLC1A3/DRD2/MDK/PTN/CXCL10/UCN	6
BP	GO:0050927	positive regulation of positive chemotaxis	6/1121	25/18723	0.00300754	0.0302859	0.0228201	VEGFA/KDR/SMAD3/S1PR1/SCG2/CXCL8	6
BP	GO:0046209	nitric oxide metabolic process	12/1121	81/18723	0.00307207	0.0307728	0.023187	HSP90AB1/CAV1/KLF4/HSP90AA1/CLEC7A/SMAD3/EDN1/ASS1/ARG2/KLF2/GCH1/TSPO	12
BP	GO:0048144	fibroblast proliferation	12/1121	81/18723	0.00307207	0.0307728	0.023187	SFRP1/CCNA2/DHX9/MYC/CDKN1A/NUPR1/AQP1/WNT5A/S100A6/PRKDC/PARP10/C1QL4	12
BP	GO:0019692	deoxyribose phosphate metabolic process	8/1121	42/18723	0.00307234	0.0307728	0.023187	ADA/CMPK2/TYMS/NEIL1/DNPH1/UPP1/NTHL1/NT5M	8
BP	GO:0045862	positive regulation of proteolysis	36/1121	372/18723	0.00312995	0.0312939	0.0235796	PLK1/RNF19A/TNFSF10/CAV1/HSPD1/PINK1/CLN6/BCL2L11/MYH9/LGALS9/AURKA/CLDN4/USP13/CDC20/CLEC7A/MYC/SMAD3/NUPR1/PSME1/MMP14/MALT1/PRICKLE1/NLRP1/CASP1/GSN/EFNA1/TRIB1/F2R/GPER1/BEX3/EFNA3/BBC3/FAM162A/PCOLCE/PSME2/PACSIN3	36
BP	GO:0090342	regulation of cell aging	10/1121	61/18723	0.00314591	0.0313976	0.0236577	FOXM1/HMGA2/B2M/PNPT1/HMGA1/BCL6/ARG2/RBL1/PRKDC/YPEL3	10
BP	GO:0003208	cardiac ventricle morphogenesis	11/1121	71/18723	0.00315848	0.031467	0.02371	TPM1/SOX4/LY6E/TGFBR2/HIF1A/NRG1/FOXF1/JAG1/PKP2/MESP1/SMARCD3	11
BP	GO:1901605	alpha-amino acid metabolic process	22/1121	195/18723	0.00318447	0.0316623	0.0238572	ODC1/CTH/AHCY/CTPS1/PLOD2/GLUL/PFAS/CAD/ADI1/PIPOX/MTHFD1/ASS1/NAT8L/DHFR/SLC7A11/ATF4/ARG2/MPST/TST/DDO/RIDA/SIRT4	22
BP	GO:0002819	regulation of adaptive immune response	21/1121	183/18723	0.00318938	0.0316623	0.0238572	HSPD1/ADA/B2M/HLA-E/IL7R/HLA-B/RSAD2/HLA-F/CLEC7A/BCL6/ZBTB7B/MALT1/HLA-A/TFRC/DUSP10/LOXL3/NECTIN2/HLA-H/KMT5C/IL23A/IFNB1	21
BP	GO:2000027	regulation of animal organ morphogenesis	16/1121	125/18723	0.00323721	0.0320804	0.0241722	SFRP1/VEGFA/CSF1/PLEKHA4/EDN1/MLLT3/PRICKLE1/VANGL2/SAPCD2/MESP1/SIX4/ANKRD6/WNT5A/MSX1/VANGL1/CELSR2	16
BP	GO:0035148	tube formation	18/1121	148/18723	0.00326962	0.0322875	0.0243283	SFRP1/SOX4/VEGFA/BCL2L11/HIF1A/LMO4/MTHFD1/RARG/PRICKLE1/VANGL2/ATOH8/SIX4/MTHFD1L/WNT5A/SHROOM3/KIF20B/WNT6/ADM	18
BP	GO:0050905	neuromuscular process	18/1121	148/18723	0.00326962	0.0322875	0.0243283	NEFL/STAC/SYNM/NR4A1/SLC1A3/DLG4/NLGN2/GLRB/ALDH1A3/DRD2/GAA/GCH1/RAC3/TNNT1/NPAS1/HIPK2/C12orf57/UCN	18
BP	GO:0003279	cardiac septum development	14/1121	103/18723	0.00328729	0.032405	0.0244168	SOX4/FGFRL1/TGFBR2/PARVA/SMAD6/LMO4/SLIT2/CRELD1/NRP1/TBX3/JAG1/WNT5A/DHRS3/PRDM1	14
BP	GO:0002221	pattern recognition receptor signaling pathway	20/1121	172/18723	0.0033904	0.0328813	0.0247756	DDX58/OAS1/CAV1/HSPD1/OASL/IFIH1/IRAK1/PIK3AP1/SLC15A3/RSAD2/DHX58/PELI1/NMI/IFI35/NINJ1/GPR108/UNC93B1/DDX60/SMPDL3B/LY96	20
BP	GO:0009125	nucleoside monophosphate catabolic process	5/1121	18/18723	0.00339103	0.0328813	0.0247756	ADA/NT5E/DNPH1/UPP1/NT5M	5
BP	GO:0009208	pyrimidine ribonucleoside triphosphate metabolic process	5/1121	18/18723	0.00339103	0.0328813	0.0247756	CTPS1/CAD/ENTPD7/NME4/NME3	5
BP	GO:0035372	protein localization to microtubule	5/1121	18/18723	0.00339103	0.0328813	0.0247756	HNRNPU/MAPRE3/CHAMP1/MID1/KIF20B	5
BP	GO:0045953	negative regulation of natural killer cell mediated cytotoxicity	5/1121	18/18723	0.00339103	0.0328813	0.0247756	HLA-E/HLA-B/LGALS9/HLA-F/HLA-A	5
BP	GO:0060749	mammary gland alveolus development	5/1121	18/18723	0.00339103	0.0328813	0.0247756	VEGFA/ID2/HIF1A/CCND1/FOXF1	5
BP	GO:0061377	mammary gland lobule development	5/1121	18/18723	0.00339103	0.0328813	0.0247756	VEGFA/ID2/HIF1A/CCND1/FOXF1	5
BP	GO:1900151	regulation of nuclear-transcribed mRNA catabolic process, deadenylation-dependent decay	5/1121	18/18723	0.00339103	0.0328813	0.0247756	TOB1/PABPC1/ZFP36L1/NANOS1/ZFP36	5
BP	GO:0006986	response to unfolded protein	17/1121	137/18723	0.00340148	0.0328813	0.0247756	CTH/HSP90AB1/HSPA8/HSPD1/MFN2/BCL2L11/HSP90AA1/ATF3/THBS1/CCND1/ABCA7/PPP1R15A/CHAC1/ATF4/DNAJB9/FBXO6/DNAJC4	17
BP	GO:0010977	negative regulation of neuron projection development	17/1121	137/18723	0.00340148	0.0328813	0.0247756	B2M/TRIM46/LPAR1/MAP4K4/SEMA6A/FLNA/SEMA6B/NRP1/SEMA3B/EFNB3/EFNA1/THY1/LRP1/VIM/EFNB2/WNT5A/TSKU	17
BP	GO:0090090	negative regulation of canonical Wnt signaling pathway	17/1121	137/18723	0.00340148	0.0328813	0.0247756	EGR1/SFRP1/CAV1/NOTUM/IGFBP4/SOST/TLE2/MLLT3/PRICKLE1/MDK/MESP1/SOX2/LZTS2/ANKRD6/WNT5A/TMEM88/IGFBP2	17
BP	GO:2001057	reactive nitrogen species metabolic process	12/1121	82/18723	0.00340727	0.0328813	0.0247756	HSP90AB1/CAV1/KLF4/HSP90AA1/CLEC7A/SMAD3/EDN1/ASS1/ARG2/KLF2/GCH1/TSPO	12
BP	GO:0030514	negative regulation of BMP signaling pathway	9/1121	52/18723	0.00342354	0.0328813	0.0247756	SFRP1/TOB1/SOST/SMAD6/CRIM1/WNT5A/HIPK2/GDF3/BAMBI	9
BP	GO:0031103	axon regeneration	9/1121	52/18723	0.00342354	0.0328813	0.0247756	NEFL/KLF4/FLNA/DHFR/LRP1/PTN/GAP43/TSPO/FKBP1B	9
BP	GO:0060071	Wnt signaling pathway, planar cell polarity pathway	9/1121	52/18723	0.00342354	0.0328813	0.0247756	SFRP1/PLEKHA4/MLLT3/PRICKLE1/VANGL2/ANKRD6/WNT5A/VANGL1/CELSR2	9
BP	GO:0070372	regulation of ERK1 and ERK2 cascade	31/1121	309/18723	0.00343864	0.0329698	0.0248424	EZR/DUSP1/KLF4/LGALS9/FAM83D/CAMK2N1/SEMA6A/CCL2/ATF3/EIF3A/AKAP12/KDR/DRD2/NRG1/LIF/NRP1/ABCA7/DUSP10/DUSP6/GBP1/LRP1/TIMP3/F2R/PTPN11/CCL5/GPER1/CCL26/RRAS/EGFR/S100A7/C1QL4	31
BP	GO:0071219	cellular response to molecule of bacterial origin	24/1121	221/18723	0.00350337	0.0332478	0.0250518	AXL/CMPK2/SERPINE1/IRAK1/CCL2/MALT1/ASS1/ZFP36/PRPF8/PLSCR4/CASP1/NFKB1/TRIB1/VIM/CCL5/WNT5A/TSPO/CXCL8/CXCL10/TRIM5/ABCA1/LY96/CEBPB/CARD16	24
BP	GO:2001235	positive regulation of apoptotic signaling pathway	16/1121	126/18723	0.00350742	0.0332478	0.0250518	SFRP1/TNFSF10/CAV1/SFPQ/BCL2L11/TPD52L1/NACC2/ATF3/THBS1/NUPR1/TIMP3/GPER1/BBC3/MSX1/PLEKHF1/IFNB1	16
BP	GO:0001736	establishment of planar polarity	11/1121	72/18723	0.00353095	0.0332478	0.0250518	SFRP1/PLEKHA4/MLLT3/PRICKLE1/VANGL2/SAPCD2/BRSK1/ANKRD6/WNT5A/VANGL1/CELSR2	11
BP	GO:0007164	establishment of tissue polarity	11/1121	72/18723	0.00353095	0.0332478	0.0250518	SFRP1/PLEKHA4/MLLT3/PRICKLE1/VANGL2/SAPCD2/BRSK1/ANKRD6/WNT5A/VANGL1/CELSR2	11
BP	GO:0032729	positive regulation of interferon-gamma production	11/1121	72/18723	0.00353095	0.0332478	0.0250518	BTN3A2/HSPD1/LGALS9/BCL3/CLEC7A/BTN3A1/ISG15/TXK/HLA-A/WNT5A/IL23A	11
BP	GO:0033045	regulation of sister chromatid segregation	11/1121	72/18723	0.00353095	0.0332478	0.0250518	PLK1/BUB1B/DUSP1/SPDL1/HNRNPU/DLGAP5/CENPE/ESPL1/CENPF/BUB1/CDC26	11
BP	GO:0033627	cell adhesion mediated by integrin	11/1121	72/18723	0.00353095	0.0332478	0.0250518	ITGBL1/ADA/SERPINE1/ITGA5/ITGB5/PIEZO1/LIF/EFNA1/PTPN11/RAC3/CCL5	11
BP	GO:1905818	regulation of chromosome separation	11/1121	72/18723	0.00353095	0.0332478	0.0250518	PLK1/BUB1B/DUSP1/PLSCR1/SPDL1/DLGAP5/CENPE/ESPL1/CENPF/BUB1/CDC26	11
BP	GO:0032755	positive regulation of interleukin-6 production	13/1121	93/18723	0.00354504	0.0332478	0.0250518	DDX58/HSPD1/IFIH1/LGALS9/DHX9/CLEC7A/ARHGEF2/F2R/PTPN11/MAVS/WNT5A/SELENOK/UCN	13
BP	GO:0051591	response to cAMP	13/1121	93/18723	0.00354504	0.0332478	0.0250518	FOSB/EZR/FOS/DUSP1/IGFBP5/ZFP36L1/STAT1/SREBF1/PNPT1/FOSL1/ASS1/JUN/AQP1	13
BP	GO:0097306	cellular response to alcohol	13/1121	93/18723	0.00354504	0.0332478	0.0250518	SFRP1/JUP/AKR1C3/KLF4/LANCL2/HMGCS1/KLF9/BRCA1/AKR1C2/KLF2/GRAMD1A/ABCA1/MLC1	13
BP	GO:0007091	metaphase/anaphase transition of mitotic cell cycle	10/1121	62/18723	0.00355402	0.0332478	0.0250518	PLK1/BUB1B/DUSP1/SPDL1/DLGAP5/CENPE/ESPL1/CENPF/BUB1/CDC26	10
BP	GO:0009116	nucleoside metabolic process	10/1121	62/18723	0.00355402	0.0332478	0.0250518	AHCY/APOBEC3F/ADA/APOBEC3G/NT5E/APOBEC3C/DNPH1/UPP1/NME4/MACROD1	10
BP	GO:0045428	regulation of nitric oxide biosynthetic process	10/1121	62/18723	0.00355402	0.0332478	0.0250518	HSP90AB1/CAV1/KLF4/HSP90AA1/CLEC7A/SMAD3/EDN1/ASS1/KLF2/TSPO	10
BP	GO:0000077	DNA damage checkpoint signaling	15/1121	115/18723	0.00357643	0.0332478	0.0250518	PLK1/SOX4/HMGA2/GTSE1/CDKN1A/TICRR/CCND1/BRCA1/BRSK1/CLSPN/PTPN11/MDC1/PRKDC/BRCC3/FBXO6	15
BP	GO:0071675	regulation of mononuclear cell migration	15/1121	115/18723	0.00357643	0.0332478	0.0250518	DUSP1/SERPINE1/LGALS9/CSF1/CCL2/THBS1/JAM2/LGALS3/SLIT2/MDK/CCL5/WNT5A/CXCL10/SELENOK/S100A7	15
BP	GO:0034142	toll-like receptor 4 signaling pathway	8/1121	43/18723	0.00358025	0.0332478	0.0250518	OAS1/IRAK1/PIK3AP1/PELI1/NMI/IFI35/NINJ1/LY96	8
BP	GO:0042771	intrinsic apoptotic signaling pathway in response to DNA damage by p53 class mediator	8/1121	43/18723	0.00358025	0.0332478	0.0250518	DDIT4/TAF9B/BCL3/CDKN1A/NUPR1/ZNF385A/PHLDA3/HIPK2	8
BP	GO:1904591	positive regulation of protein import	8/1121	43/18723	0.00358025	0.0332478	0.0250518	HSP90AB1/IPO5/JUP/FLNA/SMAD3/TRIM28/ECT2/MAVS	8
BP	GO:0007015	actin filament organization	41/1121	442/18723	0.00363377	0.0336889	0.0253842	EZR/SFRP1/TPM3/TPM1/CORO1C/TMOD1/LPAR1/COTL1/NF2/ITGB5/FLNA/SORBS2/RFLNB/RHOBTB3/DIAPH3/SMAD3/BCAR1/SLIT2/SVIL/MARCKS/NRP1/RHOB/EPS8/ARHGEF2/ADD2/GSN/PREX1/FER/ID1/MET/S1PR1/RAC3/SHROOM3/CCL26/FAM171A1/MYO5A/LIMCH1/MSRB2/TMSB4X/ANG/TPM2	41
BP	GO:0032946	positive regulation of mononuclear cell proliferation	17/1121	138/18723	0.00366884	0.033958	0.0255869	ADA/HLA-E/LGALS9/TGFBR2/CSF1/PELI1/CDKN1A/BCL6/EFNB1/HLA-A/TFRC/CCL5/CD70/SLC7A1/SELENOK/IL23A/IGFBP2	17
BP	GO:0006760	folic acid-containing compound metabolic process	6/1121	26/18723	0.00371464	0.0341005	0.0256943	TYMS/PIPOX/MTHFD1/DHFR/MTHFD1L/GCH1	6
BP	GO:0009164	nucleoside catabolic process	6/1121	26/18723	0.00371464	0.0341005	0.0256943	AHCY/APOBEC3F/ADA/APOBEC3G/APOBEC3C/UPP1	6
BP	GO:0021680	cerebellar Purkinje cell layer development	6/1121	26/18723	0.00371464	0.0341005	0.0256943	FAIM2/DLL1/WHRN/NAGLU/KIF14/TTLL1	6
BP	GO:0033598	mammary gland epithelial cell proliferation	6/1121	26/18723	0.00371464	0.0341005	0.0256943	ID2/IQGAP3/CCND1/ZNF703/WNT5A/CEBPB	6
BP	GO:0050926	regulation of positive chemotaxis	6/1121	26/18723	0.00371464	0.0341005	0.0256943	VEGFA/KDR/SMAD3/S1PR1/SCG2/CXCL8	6
BP	GO:0070665	positive regulation of leukocyte proliferation	18/1121	150/18723	0.00377853	0.0345556	0.0260372	ADA/HLA-E/LGALS9/TGFBR2/CSF1/PELI1/CDKN1A/BCL6/BST2/EFNB1/HLA-A/TFRC/CCL5/CD70/SLC7A1/SELENOK/IL23A/IGFBP2	18
BP	GO:0002685	regulation of leukocyte migration	23/1121	210/18723	0.003782	0.0345556	0.0260372	DUSP1/ADA/VEGFA/SERPINE1/LGALS9/CSF1/CCL2/THBS1/JAM2/EDN1/LGALS3/SLIT2/MMP14/MDK/THY1/PTN/CCL5/WNT5A/ZNF580/CXCL8/CXCL10/SELENOK/S100A7	23
BP	GO:0051051	negative regulation of transport	43/1121	470/18723	0.00378269	0.0345556	0.0260372	SFRP1/SP100/SERPINE2/CAV1/ADA/KCNE4/SRCIN1/PLSCR1/SREBF1/ASIC1/LGALS9/NEDD4/MAP4K4/RSAD2/HLA-F/DLG4/THBS1/ANK3/DRD2/NRG1/BST2/EDN1/LGALS3/LIF/FOXF1/ABCA7/ABCA2/SLC6A9/NFKB1/CBARP/NMB/F2R/RGS2/PTPN11/VSNL1/IRS1/IL11/PIM3/PRTN3/FKBP1B/PACSIN3/SIRT4/UCN	43
BP	GO:0051656	establishment of organelle localization	37/1121	390/18723	0.00384999	0.0351131	0.0264573	RAB3A/PLK1/EZR/NEFL/CDCA5/PINK1/TRIM46/SPDL1/KPNB1/MLPH/MYH9/LGALS9/FAM83D/HNRNPU/DLGAP5/INCENP/RAB17/HIF1A/CENPE/KIFC1/SPAG5/ESPL1/CDCA8/FOXF1/CENPF/KIF14/KIF1C/MAP4/FER/SAPCD2/KIF3B/NECTIN2/CHAMP1/DYNLT1/TCIRG1/MYO5A/IKBKG	37
BP	GO:0031345	negative regulation of cell projection organization	21/1121	186/18723	0.00386599	0.0351878	0.0265136	B2M/TRIM46/PLXNB3/LPAR1/MAP4K4/SEMA6A/FLNA/SLIT2/SEMA6B/NRP1/SEMA3B/EFNB3/MAP4/EFNA1/ID1/THY1/LRP1/VIM/EFNB2/WNT5A/TSKU	21
BP	GO:0007584	response to nutrient	20/1121	174/18723	0.00387072	0.0351878	0.0265136	SFRP1/AHCY/ADA/OXCT1/TYMS/AKR1C3/STAT1/ARSB/TGFBR2/HMGCS1/GIPR/CCND1/ASS1/PTN/TSPO/CXCL10/EGFR/IGFBP2/ABCA1/FKBP1B	20
BP	GO:0000079	regulation of cyclin-dependent protein serine/threonine kinase activity	13/1121	94/18723	0.00389415	0.0352864	0.0265879	PLK1/CCNA2/HERC5/IPO5/MAPRE3/CDKN1A/DIRAS3/CCND1/SFN/CCNF/CDKN1C/IPO7/EGFR	13
BP	GO:0010389	regulation of G2/M transition of mitotic cell cycle	13/1121	94/18723	0.00389415	0.0352864	0.0265879	PLK1/HMGA2/AURKA/CDKN1A/TICRR/CCND1/CENPF/BRCA1/KIF14/BRSK1/SMARCD3/CLSPN/BRCC3	13
BP	GO:0045744	negative regulation of G protein-coupled receptor signaling pathway	9/1121	53/18723	0.00390935	0.03531	0.0266057	ADA/APLP1/DRD2/GIPR/MET/RGS2/CCL5/CXCL8/ADM	9
BP	GO:2000772	regulation of cellular senescence	9/1121	53/18723	0.00390935	0.03531	0.0266057	HMGA2/B2M/PNPT1/HMGA1/BCL6/ARG2/RBL1/PRKDC/YPEL3	9
BP	GO:0045598	regulation of fat cell differentiation	17/1121	139/18723	0.0039533	0.0356496	0.0268616	SFRP1/ZFP36L1/ID2/HNRNPU/SMAD3/ZBTB7B/ZFP36/JAG1/DUSP10/GPER1/WNT5A/ZNF385A/METRNL/GDF3/C1QL4/NOCT/CEBPB	17
BP	GO:0001756	somitogenesis	10/1121	63/18723	0.00400301	0.0358672	0.0270255	SFRP1/NRARP/DLL1/SMAD3/HES7/FOXF1/MESP1/WNT5A/PRKDC/DLL3	10
BP	GO:0002704	negative regulation of leukocyte mediated immunity	10/1121	63/18723	0.00400301	0.0358672	0.0270255	HLA-E/IL7R/HLA-B/LGALS9/HLA-F/BCL6/BST2/FOXF1/HLA-A/IFNB1	10
BP	GO:1902099	regulation of metaphase/anaphase transition of cell cycle	10/1121	63/18723	0.00400301	0.0358672	0.0270255	PLK1/BUB1B/DUSP1/SPDL1/DLGAP5/CENPE/ESPL1/CENPF/BUB1/CDC26	10
BP	GO:1904589	regulation of protein import	10/1121	63/18723	0.00400301	0.0358672	0.0270255	HSP90AB1/HSPA8/IPO5/JUP/FLNA/SMAD3/TRIM28/ECT2/MAVS/NOLC1	10
BP	GO:0042176	regulation of protein catabolic process	37/1121	391/18723	0.00401503	0.0359175	0.0270634	ODC1/PLK1/EZR/RNF19A/HSP90AB1/SERPINE2/CAV1/PSMD2/PINK1/HSP90AA1/FAM83D/AURKA/NEDD4/AGAP2/USP13/FLNA/CDC20/SF3B3/NRG1/SMAD3/NUPR1/LDLR/PSME1/PRICKLE1/ABCA2/EFNA1/RAB26/SMARCC1/TRIB1/LRP1/TIMP3/EEF1A2/WNT5A/EGFR/HIPK2/PSME2/PACSIN3	37
BP	GO:0010976	positive regulation of neuron projection development	19/1121	163/18723	0.00411349	0.0365661	0.0275522	CNTN1/ARSB/GPC2/PLXNB3/NEGR1/FLNA/ENC1/NDNF/MDK/PPP2R5B/IQGAP1/ABL2/LRP1/PTN/RGS2/DYNLT1/WNT5A/TENM3/FKBP1B	19
BP	GO:0033044	regulation of chromosome organization	21/1121	187/18723	0.00411652	0.0365661	0.0275522	PLK1/BUB1B/DUSP1/DKC1/CDCA5/SFPQ/SPDL1/MCM2/HNRNPU/DLGAP5/CENPE/CCT5/MYC/NEK2/ESPL1/CENPF/BUB1/TRIM28/PIF1/GNL3L/CDC26	21
BP	GO:0002697	regulation of immune effector process	33/1121	339/18723	0.00415034	0.0365661	0.0275522	DDX58/HSPD1/B2M/HLA-E/IL7R/CFH/HLA-B/LGALS9/RSAD2/HLA-F/DHX58/CLEC7A/BCL6/BST2/LGALS3/ZBTB7B/FOXF1/MALT1/HLA-A/TFRC/DUSP10/FER/LOXL3/NECTIN2/DNAJB9/HLA-H/MAVS/KMT5C/WNT5A/DDX60/PRKDC/IL23A/IFNB1	33
BP	GO:0002066	columnar/cuboidal epithelial cell development	8/1121	44/18723	0.00415078	0.0365661	0.0275522	TYMS/HIF1A/DLL1/CDKN1A/RARG/WNT5A/PRDM1/NKX3-2	8
BP	GO:0089718	amino acid import across plasma membrane	8/1121	44/18723	0.00415078	0.0365661	0.0275522	SLC16A2/SLC1A3/SLC6A6/KCNJ10/SLC7A11/SLC6A9/RGS2/SLC7A1	8
BP	GO:0008608	attachment of spindle microtubules to kinetochore	7/1121	35/18723	0.00415272	0.0365661	0.0275522	HNRNPU/CENPE/NEK2/SPAG5/KNL1/ECT2/CHAMP1	7
BP	GO:0009119	ribonucleoside metabolic process	7/1121	35/18723	0.00415272	0.0365661	0.0275522	AHCY/APOBEC3F/ADA/APOBEC3G/NT5E/APOBEC3C/UPP1	7
BP	GO:0039694	viral RNA genome replication	7/1121	35/18723	0.00415272	0.0365661	0.0275522	APOBEC3F/HMGA2/APOBEC3G/APOBEC3C/ATG16L2/TRIM28/CXCL8	7
BP	GO:0072528	pyrimidine-containing compound biosynthetic process	7/1121	35/18723	0.00415272	0.0365661	0.0275522	CMPK2/CTPS1/TYMS/CAD/UPP1/NME4/NME3	7
BP	GO:0097421	liver regeneration	7/1121	35/18723	0.00415272	0.0365661	0.0275522	TYMS/PNPT1/AURKA/CCND1/CPT1A/EGFR/CEBPB	7
BP	GO:0050768	negative regulation of neurogenesis	17/1121	140/18723	0.00425567	0.0373242	0.0281234	B2M/TRIM46/SEMA6A/LDLR/MYCN/SEMA6B/NRP1/SEMA3B/EFNB3/DUSP10/ID1/THY1/PTN/DYNLT1/WNT5A/TSPO/DLL3	17
BP	GO:0090263	positive regulation of canonical Wnt signaling pathway	14/1121	106/18723	0.00427968	0.0373242	0.0281234	SFRP1/LGR6/CAV1/SOX4/JUP/NRARP/PLEKHA4/SMAD3/RPS12/NFKB1/PPM1N/ASPM/EGFR/BAMBI	14
BP	GO:0006534	cysteine metabolic process	4/1121	12/18723	0.00429205	0.0373242	0.0281234	CTH/SLC7A11/MPST/TST	4
BP	GO:0035739	CD4-positive, alpha-beta T cell proliferation	4/1121	12/18723	0.00429205	0.0373242	0.0281234	LGALS9/TGFBR2/ARG2/LGALS7B	4
BP	GO:0046051	UTP metabolic process	4/1121	12/18723	0.00429205	0.0373242	0.0281234	CAD/ENTPD7/NME4/NME3	4
BP	GO:0051255	spindle midzone assembly	4/1121	12/18723	0.00429205	0.0373242	0.0281234	KIF4A/INCENP/KIF23/LZTS2	4
BP	GO:0070572	positive regulation of neuron projection regeneration	4/1121	12/18723	0.00429205	0.0373242	0.0281234	FLNA/LRP1/PTN/FKBP1B	4
BP	GO:2000561	regulation of CD4-positive, alpha-beta T cell proliferation	4/1121	12/18723	0.00429205	0.0373242	0.0281234	LGALS9/TGFBR2/ARG2/LGALS7B	4
BP	GO:0046651	lymphocyte proliferation	29/1121	288/18723	0.0043277	0.037576	0.028313	HSPD1/ADA/CTPS1/HLA-E/IL7R/LGALS9/TGFBR2/PELI1/CDKN1A/BCL6/BTN3A1/LGALS3/ZBTB7B/EFNB1/MALT1/HLA-A/TFRC/ARG2/CCL5/CD70/SLC7A1/SELENOK/IL23A/IFNB1/IGFBP2/FKBP1B/PSMB10/CEBPB/LGALS7B	29
BP	GO:0051092	positive regulation of NF-kappaB transcription factor activity	18/1121	152/18723	0.00435125	0.0376894	0.0283985	CTH/TRIM22/CAV1/IRAK1/LGALS9/DHX9/CLEC7A/MALT1/ARHGEF2/TFRC/FER/RPS6KA4/TRIM21/WNT5A/RHEBL1/TRIM5/IKBKG/CARD16	18
BP	GO:0002716	negative regulation of natural killer cell mediated immunity	5/1121	19/18723	0.00437805	0.0376894	0.0283985	HLA-E/HLA-B/LGALS9/HLA-F/HLA-A	5
BP	GO:0031065	positive regulation of histone deacetylation	5/1121	19/18723	0.00437805	0.0376894	0.0283985	VEGFA/PINK1/SREBF1/BCL6/ZBTB7B	5
BP	GO:0042474	middle ear morphogenesis	5/1121	19/18723	0.00437805	0.0376894	0.0283985	EDN1/NAGLU/OSR2/MSX1/NKX3-2	5
BP	GO:0048245	eosinophil chemotaxis	5/1121	19/18723	0.00437805	0.0376894	0.0283985	CCL2/LGALS3/CCL5/SCG2/CCL26	5
BP	GO:0010822	positive regulation of mitochondrion organization	11/1121	74/18723	0.00438108	0.0376894	0.0283985	TNFSF10/PINK1/BCL2L11/AURKA/SLC25A5/HIF1A/KDR/GPER1/BBC3/FAM162A/BIK	11
BP	GO:0050680	negative regulation of epithelial cell proliferation	19/1121	164/18723	0.00439886	0.0377342	0.0284323	SFRP1/CAV1/B2M/STAT1/WDR77/CCL2/THBS1/NUPR1/KLF9/SFN/DUSP10/ATOH8/SOX2/PTN/WNT5A/CDKN1C/SCG2/CD109/RIDA	19
BP	GO:0050769	positive regulation of neurogenesis	24/1121	225/18723	0.00439975	0.0377342	0.0284323	SERPINE2/NEFL/VEGFA/ID2/PLXNB3/HIF1A/CDH4/EGR2/DRD2/SLIT2/LIF/NRP1/EIF4G2/MDK/LRP1/SMARCD3/PTN/OBSL1/GPER1/TSPO/ASPM/NEURL1/EGFR/CRABP2	24
BP	GO:0007498	mesoderm development	16/1121	129/18723	0.00443148	0.0378905	0.02855	ETS2/VEGFA/HMGA2/ZFP36L1/KLF4/TXNRD1/NF2/SMAD3/HES7/FOXF1/TBX3/KDM6B/MESP1/WNT5A/PUS7/DLL3	16
BP	GO:0043280	positive regulation of cysteine-type endopeptidase activity involved in apoptotic process	16/1121	129/18723	0.00443148	0.0378905	0.02855	TNFSF10/HSPD1/BCL2L11/LGALS9/CLEC7A/MYC/SMAD3/MALT1/NLRP1/CASP1/GSN/F2R/GPER1/BEX3/BBC3/FAM162A	16
BP	GO:0001706	endoderm formation	9/1121	54/18723	0.00444744	0.0379691	0.0286092	DUSP1/HMGA2/ITGA5/ITGB5/COL6A1/MMP14/MESP1/SOX2/COL12A1	9
BP	GO:0080164	regulation of nitric oxide metabolic process	10/1121	64/18723	0.00449564	0.0383223	0.0288754	HSP90AB1/CAV1/KLF4/HSP90AA1/CLEC7A/SMAD3/EDN1/ASS1/KLF2/TSPO	10
BP	GO:0008584	male gonad development	17/1121	141/18723	0.00457677	0.0389547	0.0293519	SFRP1/TNFSF10/RRM1/DHX37/AKR1C3/BCL2L11/FLNA/HMGCS1/RHOBTB3/NUPR1/CCND1/MMP14/COL9A3/SIX4/WNT5A/ASPM/BIK	17
BP	GO:0021761	limbic system development	14/1121	107/18723	0.00465987	0.039557	0.0298057	NEFL/BTG2/NF2/ALDH1A3/DRD2/SEMA6B/NRP1/TBX3/NDNF/KDM6B/KIF14/MDK/ETS1/TSKU	14
BP	GO:0001823	mesonephros development	13/1121	96/18723	0.00467575	0.039557	0.0298057	CALB1/SFRP1/VEGFA/SMAD6/MYC/SMAD3/SLIT2/OSR2/SIX4/ARG2/LZTS2/KIF26B/WNT6	13
BP	GO:0002718	regulation of cytokine production involved in immune response	13/1121	96/18723	0.00467575	0.039557	0.0298057	DDX58/B2M/HLA-E/RSAD2/HLA-F/CLEC7A/BCL6/BST2/MALT1/HLA-A/MAVS/WNT5A/IFNB1	13
BP	GO:0030510	regulation of BMP signaling pathway	13/1121	96/18723	0.00467575	0.039557	0.0298057	SFRP1/TOB1/SOST/SMAD6/CRIM1/CDH5/WNT5A/FKBP8/MSX1/HIPK2/GDF3/FBXL15/BAMBI	13
BP	GO:0050730	regulation of peptidyl-tyrosine phosphorylation	27/1121	264/18723	0.00468641	0.0395875	0.0298287	SFRP1/CAV1/ENPP2/VEGFA/SRCIN1/CNTN1/ITGA5/NF2/DLG4/CLEC7A/NRG1/NCAPG2/LIF/NRP1/ARHGEF2/EFNA1/PARP14/PPP2R5B/IQGAP1/THY1/CADM4/PTPN11/CCL5/IL11/NEURL1/EGFR/IL23A	27
BP	GO:0042060	wound healing	39/1121	422/18723	0.00477082	0.0402399	0.0303203	RAB3A/PABPC4/C1QTNF1/SERPINE2/CSRP1/CAV1/TPM1/AXL/VEGFA/PLSCR1/SERPINE1/MYH9/ITGA5/TGFBR2/CLDN4/PEAR1/FLNA/HIF1A/THBS1/CLEC7A/KDR/PPL/CDKN1A/NRG1/SMAD3/EDN1/MCAM/TXK/MYOF/NDNF/SLC7A11/ETS1/F2R/CADM4/VCL/WNT5A/TSKU/EGFR/CD109	39
BP	GO:0035987	endodermal cell differentiation	8/1121	45/18723	0.00478881	0.0402705	0.0303434	HMGA2/ITGA5/ITGB5/COL6A1/MMP14/MESP1/SOX2/COL12A1	8
BP	GO:0071364	cellular response to epidermal growth factor stimulus	8/1121	45/18723	0.00478881	0.0402705	0.0303434	NCL/ZFP36L1/CAD/ZFP36/ID1/IQGAP1/PTPN11/EGFR	8
BP	GO:0061448	connective tissue development	26/1121	252/18723	0.00486159	0.0407737	0.0307225	EGR1/OXCT1/EFEMP1/TGFBI/TYMS/HMGA2/THRA/TGFBR2/CSF1/HIF1A/RFLNB/SMAD3/EDN1/GDF6/MYCN/PBXIP1/RARG/MDK/OSR2/SELENOM/PTPN11/THBS3/WNT5A/MSX1/NKX3-2/TSKU	26
BP	GO:0050900	leukocyte migration	35/1121	369/18723	0.00486319	0.0407737	0.0307225	DUSP1/ADA/VEGFA/SERPINE1/MYH9/LGALS9/CSF1/CCL2/THBS1/JAM2/EDN1/LGALS3/SLIT2/MMP14/EPS8/NINJ1/ADD2/PREX1/MDK/GCNT1/FER/THY1/S1PR1/PTN/CCL5/WNT5A/SCG2/CCL26/CXCL16/ZNF580/CXCL8/CXCL10/SELENOK/S100A7/PRTN3	35
BP	GO:1901658	glycosyl compound catabolic process	7/1121	36/18723	0.00489375	0.0409687	0.0308694	AHCY/APOBEC3F/ADA/APOBEC3G/APOBEC3C/FUCA1/UPP1	7
BP	GO:2001233	regulation of apoptotic signaling pathway	34/1121	356/18723	0.00491472	0.0410447	0.0309267	CTH/UNC5B/FAIM2/SFRP1/SP100/TNFSF10/CAV1/SFPQ/PINK1/SERPINE1/BCL2L11/TAF9B/TPD52L1/NACC2/SLC25A5/HIF1A/ATF3/THBS1/IFI6/NOC2L/MEIS3/NUPR1/LGALS3/NRP1/BRCA1/ARHGEF2/TIMP3/GPER1/SCG2/ZNF385A/BBC3/MSX1/PLEKHF1/IFNB1	34
BP	GO:0046546	development of primary male sexual characteristics	17/1121	142/18723	0.00491746	0.0410447	0.0309267	SFRP1/TNFSF10/RRM1/DHX37/AKR1C3/BCL2L11/FLNA/HMGCS1/RHOBTB3/NUPR1/CCND1/MMP14/COL9A3/SIX4/WNT5A/ASPM/BIK	17
BP	GO:0050770	regulation of axonogenesis	18/1121	154/18723	0.00499358	0.0415169	0.0312825	NEFL/VEGFA/TRIM46/PLXNB3/SEMA6A/CDH4/SLIT2/SEMA6B/NRP1/SEMA3B/EFNB3/EIF4G2/EFNA1/THY1/LRP1/BRSK1/WNT5A/CRABP2	18
BP	GO:0002720	positive regulation of cytokine production involved in immune response	10/1121	65/18723	0.00503476	0.0415169	0.0312825	DDX58/B2M/HLA-E/RSAD2/HLA-F/CLEC7A/MALT1/HLA-A/MAVS/WNT5A	10
BP	GO:0010965	regulation of mitotic sister chromatid separation	10/1121	65/18723	0.00503476	0.0415169	0.0312825	PLK1/BUB1B/DUSP1/SPDL1/DLGAP5/CENPE/ESPL1/CENPF/BUB1/CDC26	10
BP	GO:0044784	metaphase/anaphase transition of cell cycle	10/1121	65/18723	0.00503476	0.0415169	0.0312825	PLK1/BUB1B/DUSP1/SPDL1/DLGAP5/CENPE/ESPL1/CENPF/BUB1/CDC26	10
BP	GO:0070613	regulation of protein processing	10/1121	65/18723	0.00503476	0.0415169	0.0312825	SERPINE2/CAST/SERPINE1/MYH9/THBS1/MMP14/CHAC1/GSN/SIRT4/CARD16	10
BP	GO:0000768	syncytium formation by plasma membrane fusion	9/1121	55/18723	0.00504148	0.0415169	0.0312825	GDF15/MYH9/JAM2/MYOF/TCTA/ADAMTS15/ADAM12/CXCL10/CD109	9
BP	GO:0001755	neural crest cell migration	9/1121	55/18723	0.00504148	0.0415169	0.0312825	CORO1C/GBX2/SEMA6A/HIF1A/EFNB1/SEMA6B/NRP1/SEMA3B/NRTN	9
BP	GO:0038066	p38MAPK cascade	9/1121	55/18723	0.00504148	0.0415169	0.0312825	EZR/DUSP1/VEGFA/ZFP36L1/LGALS9/GDF6/ZFP36/DUSP10/RELL2	9
BP	GO:0140253	cell-cell fusion	9/1121	55/18723	0.00504148	0.0415169	0.0312825	GDF15/MYH9/JAM2/MYOF/TCTA/ADAMTS15/ADAM12/CXCL10/CD109	9
BP	GO:0031669	cellular response to nutrient levels	23/1121	215/18723	0.00504805	0.0415169	0.0312825	SESN2/SFRP1/HSPA8/MYBBP1A/SLC38A3/GLUL/AKR1C3/SREBF1/PRKAG2/EIF4G1/ATF3/CDKN1A/DNAJC15/RRAGD/JUN/TFEB/ATF4/ITFG2/BRSK1/PTN/MAP1LC3A/UPP1/UCN2	23
BP	GO:0034446	substrate adhesion-dependent cell spreading	14/1121	108/18723	0.0050669	0.0416109	0.0313533	AXL/CORO1C/NTNG2/SRCIN1/FLNA/PARVA/NRP1/KIF14/PREX1/MDK/FER/EFNA1/GBP1/RAC3	14
BP	GO:0030336	negative regulation of cell migration	33/1121	344/18723	0.00517801	0.0424612	0.031994	IFITM1/SFRP1/SP100/DUSP1/ADA/TPM1/CORO1C/IGFBP5/SERPINE1/JUP/KLF4/PLXNB3/NF2/CCL2/THBS1/DRD2/NRG1/BST2/SLIT2/NAV3/RHOB/JAG1/DUSP10/TRIB1/THY1/ARHGDIA/LRP1/PTN/S1PR2/VCL/LIMCH1/RRAS/ABHD2	33
BP	GO:0003002	regionalization	32/1121	331/18723	0.0052155	0.0427062	0.0321786	SFRP1/ETS2/BTG2/GBX2/NRARP/AURKA/WDR77/SMAD6/DLL1/EGR2/SMAD3/EDN1/MLLT3/HES7/NRP1/RARG/FOXF1/TBX3/MESP1/SMARCD3/HES4/WNT5A/FKBP8/MSX1/PRKDC/HOXB2/CELSR2/HIPK2/HOXD9/SP8/DLL3/FBXL15	32
BP	GO:0060047	heart contraction	25/1121	241/18723	0.0053039	0.0433667	0.0326763	ATP1B1/CAV1/ADA/TPM1/KCNE4/JUP/SREBF1/THRA/SCN4B/FLNA/DRD2/EDN1/PKP2/GSN/GAA/ADRA1D/GCH1/RGS2/KCNJ8/KCND3/ADRA1B/CYP2J2/ADM/FKBP1B/UCN	25
BP	GO:0001936	regulation of endothelial cell proliferation	20/1121	179/18723	0.00532351	0.043386	0.0326909	CAV1/VEGFA/STAT1/PLXNB3/NRARP/NR4A1/CCL2/HIF1A/THBS1/KDR/NRP1/MDK/ATOH8/WNT5A/SCG2/CCL26/ZNF580/EGR3/EGFL7/ANG	20
BP	GO:0010950	positive regulation of endopeptidase activity	20/1121	179/18723	0.00532351	0.043386	0.0326909	TNFSF10/HSPD1/BCL2L11/LGALS9/CLEC7A/MYC/SMAD3/PSME1/MALT1/NLRP1/CASP1/GSN/EFNA1/F2R/GPER1/BEX3/EFNA3/BBC3/FAM162A/PSME2	20
BP	GO:0048675	axon extension	15/1121	120/18723	0.00535208	0.043386	0.0326909	HSP90AB1/VEGFA/TRIM46/HSP90AA1/SEMA6A/CDH4/SLIT2/SEMA6B/NRP1/SEMA3B/EIF4G2/LRP1/VCL/WNT5A/NRCAM	15
BP	GO:0051897	positive regulation of protein kinase B signaling	15/1121	120/18723	0.00535208	0.043386	0.0326909	HSP90AB1/C1QTNF1/AXL/GDF15/IGFBP5/PINK1/AKR1C3/HSP90AA1/THBS1/MEIS3/NRG1/AKR1C2/MET/IGF1R/EGFR	15
BP	GO:0071774	response to fibroblast growth factor	15/1121	120/18723	0.00535208	0.043386	0.0326909	SFRP1/SHCBP1/ZFP36L1/FGFRL1/NR4A1/CCL2/THBS1/IER2/NDNF/ZFP36/PTPN11/CCL5/WNT5A/CXCL8/EGR3	15
BP	GO:0032956	regulation of actin cytoskeleton organization	34/1121	358/18723	0.00535267	0.043386	0.0326909	SFRP1/TPM1/TMOD1/IQGAP3/LPAR1/COTL1/NF2/FLNA/RHOBTB3/SMAD3/BST2/EDN1/SLIT2/SVIL/NRP1/RHOB/EPS8/ADD2/GSN/PREX1/MDK/FER/ECT2/ID1/IQGAP1/ABL2/ARHGDIA/LRP1/MET/S1PR1/RAC3/CCL26/LIMCH1/TMSB4X	34
BP	GO:0009123	nucleoside monophosphate metabolic process	11/1121	76/18723	0.00538631	0.0435328	0.0328015	ADA/CMPK2/TYMS/NT5E/PFAS/CAD/DNPH1/AK4/UPP1/NT5M/MAGI3	11
BP	GO:0072332	intrinsic apoptotic signaling pathway by p53 class mediator	11/1121	76/18723	0.00538631	0.0435328	0.0328015	MYBBP1A/DDIT4/TAF9B/BCL3/CDKN1A/NUPR1/E2F2/ZNF385A/MSX1/PHLDA3/HIPK2	11
BP	GO:1904951	positive regulation of establishment of protein localization	31/1121	319/18723	0.00548272	0.0441286	0.0332504	EZR/HSP90AB1/DKC1/OXCT1/SOX4/IPO5/PINK1/JUP/GLUL/CAMK2N1/NLGN2/FLNA/HIF1A/KCNN4/CCT5/ANK3/SMAD3/GIPR/SFN/ACHE/TRIM28/ECT2/LRP1/CEMIP/VSNL1/GPER1/MAVS/KIF20B/BBC3/EGFR/ANG	31
BP	GO:0010818	T cell chemotaxis	6/1121	28/18723	0.005488	0.0441286	0.0332504	CCL5/WNT5A/CCL26/CXCL16/CXCL10/S100A7	6
BP	GO:0086011	membrane repolarization during action potential	6/1121	28/18723	0.005488	0.0441286	0.0332504	ATP1B1/CAV1/KCNE4/FLNA/KCNJ8/KCND3	6
BP	GO:0034198	cellular response to amino acid starvation	8/1121	46/18723	0.00549935	0.0441286	0.0332504	SESN2/ATF3/CDKN1A/RRAGD/TFEB/ATF4/ITFG2/MAP1LC3A	8
BP	GO:0044818	mitotic G2/M transition checkpoint	8/1121	46/18723	0.00549935	0.0441286	0.0332504	PLK1/HMGA2/CDKN1A/TICRR/BRCA1/BRSK1/CLSPN/BRCC3	8
BP	GO:0045667	regulation of osteoblast differentiation	16/1121	132/18723	0.00554549	0.0444352	0.0334814	IFITM1/RANBP3L/SFRP1/TOB1/IGFBP5/SMAD6/CRIM1/SMAD3/JAG1/ATF4/ID3/TCIRG1/JUND/NOCT/CEBPB/BAMBI	16
BP	GO:0002367	cytokine production involved in immune response	13/1121	98/18723	0.00557874	0.0445503	0.0335682	DDX58/B2M/HLA-E/RSAD2/HLA-F/CLEC7A/BCL6/BST2/MALT1/HLA-A/MAVS/WNT5A/IFNB1	13
BP	GO:0032872	regulation of stress-activated MAPK cascade	21/1121	192/18723	0.00558037	0.0445503	0.0335682	EZR/SFRP1/DUSP1/VEGFA/FOXM1/PINK1/TPD52L1/MAP4K4/CLEC7A/MYC/GDF6/MAP3K10/DUSP10/ANKRD6/WNT5A/MID1/IGF1R/RELL2/EGFR/HIPK2/MAGI3	21
BP	GO:2000146	negative regulation of cell motility	34/1121	359/18723	0.00558368	0.0445503	0.0335682	IFITM1/SFRP1/SP100/DUSP1/ADA/TPM1/CORO1C/IGFBP5/SERPINE1/JUP/KLF4/PLXNB3/NF2/CCL2/THBS1/DRD2/NRG1/BST2/SLIT2/NAV3/RHOB/JAG1/FRMD5/DUSP10/TRIB1/THY1/ARHGDIA/LRP1/PTN/S1PR2/VCL/LIMCH1/RRAS/ABHD2	34
BP	GO:0050727	regulation of inflammatory response	36/1121	386/18723	0.0056587	0.0450847	0.0339708	HSPD1/ADA/USP18/SERPINE1/HLA-E/NT5E/KLF4/PIK3AP1/DHX9/NEAT1/SMAD3/BCL6/NUPR1/NMI/IFI35/LDLR/FOXF1/NLRP1/NINJ1/ZFP36/CASP1/DUSP10/MDK/NFKB1/ETS1/CDH5/CCL5/GPER1/WNT5A/METRNL/SMPDL3B/EGFR/IL23A/GPX4/TMSB4X/CEBPB	36
BP	GO:0048008	platelet-derived growth factor receptor signaling pathway	9/1121	56/18723	0.00569524	0.0453115	0.0341416	TXNIP/VEGFA/ZFAND5/BCAR1/NRP1/FER/LRP1/PTPN11/PDGFRL	9
BP	GO:0048846	axon extension involved in axon guidance	7/1121	37/18723	0.00572996	0.0454588	0.0342527	VEGFA/SEMA6A/SLIT2/SEMA6B/NRP1/SEMA3B/WNT5A	7
BP	GO:1902284	neuron projection extension involved in neuron projection guidance	7/1121	37/18723	0.00572996	0.0454588	0.0342527	VEGFA/SEMA6A/SLIT2/SEMA6B/NRP1/SEMA3B/WNT5A	7
BP	GO:0010038	response to metal ion	35/1121	373/18723	0.00574489	0.0455128	0.0342934	TXNIP/FOSB/FOS/DUSP1/CAV1/KCNMA1/B2M/PLSCR1/AKR1C3/SYT12/NEDD4/JUNB/DLG4/HIF1A/THBS1/ANK3/DRD2/EDN1/GIPR/CCND1/ASS1/AQP2/JUN/MT1X/ECT2/AQP1/IQGAP1/WNT5A/MAP1LC3A/TCIRG1/TSPO/JUND/EGFR/IGFBP2/ENDOG	35
BP	GO:0001838	embryonic epithelial tube formation	15/1121	121/18723	0.00578088	0.0456788	0.0344185	SFRP1/SOX4/HIF1A/LMO4/MTHFD1/RARG/PRICKLE1/VANGL2/SIX4/MTHFD1L/WNT5A/SHROOM3/KIF20B/WNT6/ADM	15
BP	GO:0030595	leukocyte chemotaxis	24/1121	230/18723	0.00578213	0.0456788	0.0344185	DUSP1/VEGFA/SERPINE1/LGALS9/CSF1/CCL2/THBS1/EDN1/LGALS3/SLIT2/NINJ1/PREX1/MDK/S1PR1/PTN/CCL5/WNT5A/SCG2/CCL26/CXCL16/ZNF580/CXCL8/CXCL10/S100A7	24
BP	GO:0002764	immune response-regulating signaling pathway	42/1121	468/18723	0.00582971	0.0459899	0.0346529	DDX58/KHDRBS1/OAS1/EZR/BTN3A2/PLPP4/CAV1/HSPD1/ADA/PLSCR1/OASL/IFIH1/IRAK1/PIK3AP1/SLC15A3/RSAD2/DHX58/BTN3A3/KCNN4/CLEC7A/PELI1/BCAR1/NMI/BTN3A1/LGALS3/IFI35/TXK/MALT1/HLA-A/NINJ1/THEMIS2/FER/THY1/NECTIN2/GPR108/GBP1/UNC93B1/DDX60/SMPDL3B/IKBKG/SH2B2/LY96	42
BP	GO:0007494	midgut development	4/1121	13/18723	0.00590871	0.0461061	0.0347404	FOXF1/ASS1/WNT5A/EGFR	4
BP	GO:0021681	cerebellar granular layer development	4/1121	13/18723	0.00590871	0.0461061	0.0347404	FAIM2/SERPINE2/KIF14/MDK	4
BP	GO:0046642	negative regulation of alpha-beta T cell proliferation	4/1121	13/18723	0.00590871	0.0461061	0.0347404	LGALS9/ZBTB7B/ARG2/LGALS7B	4
BP	GO:0051988	regulation of attachment of spindle microtubules to kinetochore	4/1121	13/18723	0.00590871	0.0461061	0.0347404	HNRNPU/NEK2/SPAG5/ECT2	4
BP	GO:0060213	positive regulation of nuclear-transcribed mRNA poly(A) tail shortening	4/1121	13/18723	0.00590871	0.0461061	0.0347404	TOB1/PABPC1/BTG2/ZFP36	4
BP	GO:1902043	positive regulation of extrinsic apoptotic signaling pathway via death domain receptors	4/1121	13/18723	0.00590871	0.0461061	0.0347404	SFRP1/ATF3/THBS1/TIMP3	4
BP	GO:1902947	regulation of tau-protein kinase activity	4/1121	13/18723	0.00590871	0.0461061	0.0347404	EGR1/HSP90AB1/HSP90AA1/NAB2	4
BP	GO:0043434	response to peptide hormone	38/1121	414/18723	0.00591019	0.0461061	0.0347404	EGR1/SESN2/TNFSF10/NEFL/CAV1/CCNA2/GDF15/IGFBP5/ZFP36L1/STAT1/SREBF1/BTG2/PNPT1/AGTRAP/NCOA5/NR4A1/SLC27A1/CAD/EGR2/BCAR1/EDN1/ZBTB7B/ASS1/GCNT1/FER/NFKB1/SMARCC1/IQGAP1/PTPN11/GPER1/IRS1/IGF1R/MYO5A/JUND/PRKDC/SOGA1/ADM/SH2B2	38
BP	GO:0001935	endothelial cell proliferation	21/1121	193/18723	0.00591928	0.0461128	0.0347455	CAV1/VEGFA/STAT1/PLXNB3/NRARP/NR4A1/CCL2/HIF1A/THBS1/KDR/NRP1/MMP14/MDK/ATOH8/WNT5A/SCG2/CCL26/ZNF580/EGR3/EGFL7/ANG	21
BP	GO:0007492	endoderm development	11/1121	77/18723	0.00595285	0.04631	0.0348941	DUSP1/HMGA2/ZFP36L1/ITGA5/ITGB5/COL6A1/SMAD3/MMP14/MESP1/SOX2/COL12A1	11
BP	GO:0090092	regulation of transmembrane receptor protein serine/threonine kinase signaling pathway	26/1121	256/18723	0.00596232	0.0463194	0.0349012	SFRP1/HSP90AB1/CAV1/TOB1/GDF15/SOST/SMAD6/THBS1/PMEPA1/CRIM1/SMAD3/GDF6/LRP1/CDH5/ZNF703/WNT5A/CDKN1C/FKBP8/PEG10/MSX1/HIPK2/CD109/C20orf27/GDF3/FBXL15/BAMBI	26
BP	GO:0051961	negative regulation of nervous system development	17/1121	145/18723	0.00606577	0.0469714	0.0353924	B2M/TRIM46/SEMA6A/LDLR/MYCN/SEMA6B/NRP1/SEMA3B/EFNB3/DUSP10/ID1/THY1/PTN/DYNLT1/WNT5A/TSPO/DLL3	17
BP	GO:0008630	intrinsic apoptotic signaling pathway in response to DNA damage	13/1121	99/18723	0.00607973	0.0469714	0.0353924	BCL2L11/DDIT4/TAF9B/BCL3/NACC2/CDKN1A/NUPR1/SFN/BRCA1/ZNF385A/PHLDA3/PRKDC/HIPK2	13
BP	GO:0021549	cerebellum development	13/1121	99/18723	0.00607973	0.0469714	0.0353924	FAIM2/SERPINE2/CNTN1/GBX2/DLL1/NANOS1/WHRN/NAGLU/KIF14/MDK/TTLL1/PTN/PTPN11	13
BP	GO:0031341	regulation of cell killing	13/1121	99/18723	0.00607973	0.0469714	0.0353924	HSP90AB1/B2M/HLA-E/IL7R/CFH/HLA-B/LGALS9/HLA-F/CLEC7A/HLA-A/NECTIN2/HLA-H/IL23A	13
BP	GO:0031110	regulation of microtubule polymerization or depolymerization	12/1121	88/18723	0.00608839	0.0469735	0.035394	TPX2/MAPRE3/SKA3/CKAP2/SKA1/NAV3/ARHGEF2/CKAP5/CDH5/MET/MID1/TUBB4A	12
BP	GO:0017038	protein import	22/1121	206/18723	0.00612995	0.0472293	0.0355867	TXNIP/HSP90AB1/HSPA8/HSPD1/IPO5/JUP/KPNB1/HSP90AA1/BCL3/FLNA/CDKN1A/SMAD3/NUP188/NUP98/DNAJC15/PRICKLE1/TRIM28/ECT2/MAVS/IPO7/NOLC1/ROMO1	22
BP	GO:0031109	microtubule polymerization or depolymerization	15/1121	122/18723	0.00623695	0.0479878	0.0361582	TPX2/MAPRE3/SKA3/KIF18B/CKAP2/SKA1/NAV3/ARHGEF2/TUBG2/CKAP5/TPPP3/CDH5/MET/MID1/TUBB4A	15
BP	GO:0035914	skeletal muscle cell differentiation	10/1121	67/18723	0.00626409	0.0480647	0.0362162	EGR1/FOS/BTG2/NR4A1/HIVEP3/ATF3/EGR2/NUPR1/S100B/SIX4	10
BP	GO:0051306	mitotic sister chromatid separation	10/1121	67/18723	0.00626409	0.0480647	0.0362162	PLK1/BUB1B/DUSP1/SPDL1/DLGAP5/CENPE/ESPL1/CENPF/BUB1/CDC26	10
BP	GO:0007595	lactation	8/1121	47/18723	0.00628748	0.0481126	0.0362522	CAV1/VEGFA/CAD/HIF1A/OAS2/ZBTB7B/CCND1/NEURL1	8
BP	GO:0010799	regulation of peptidyl-threonine phosphorylation	8/1121	47/18723	0.00628748	0.0481126	0.0362522	PLK1/DDIT4/PRKAG2/EIF4G1/CADM4/CEMIP/S1PR2/WNT5A	8
BP	GO:0050890	cognition	29/1121	296/18723	0.00632581	0.0483399	0.0364236	RCAN1/CALB1/FOS/SGK1/B2M/BTG2/ASIC1/NRXN3/THRA/DLG4/PRRT1/HIF1A/EGR2/DRD2/FOSL1/LDLR/S100B/ABCA7/JUN/SLC7A11/MDK/BRSK1/PTN/FOXO6/EGFR/C1QL1/CEBPB/C12orf57/UCN	29
BP	GO:0002705	positive regulation of leukocyte mediated immunity	16/1121	134/18723	0.00640697	0.0488693	0.0368224	DDX58/HSPD1/B2M/HLA-E/HLA-B/RSAD2/HLA-F/CLEC7A/MALT1/HLA-A/TFRC/NECTIN2/HLA-H/MAVS/KMT5C/IL23A	16
BP	GO:0006949	syncytium formation	9/1121	57/18723	0.00641251	0.0488693	0.0368224	GDF15/MYH9/JAM2/MYOF/TCTA/ADAMTS15/ADAM12/CXCL10/CD109	9
BP	GO:0090288	negative regulation of cellular response to growth factor stimulus	14/1121	111/18723	0.00646257	0.0491839	0.0370595	SFRP1/TOB1/NEDD4/SEMA6A/SOST/SMAD6/THBS1/CRIM1/SLIT2/CADM4/WNT5A/HIPK2/GDF3/BAMBI	14
BP	GO:0007189	adenylate cyclase-activating G protein-coupled receptor signaling pathway	17/1121	146/18723	0.00649364	0.0493534	0.0371872	ADGRB2/LPAR1/APLP1/DRD2/GIPR/S1PR5/ADGRL1/ADGRE1/ADRA1D/S1PR1/S1PR2/GPER1/CXCL10/ADRA1B/ADM/ABCA1/UCN2	17
BP	GO:0009218	pyrimidine ribonucleotide metabolic process	6/1121	29/18723	0.00657566	0.0497745	0.0375045	CTPS1/CAD/ENTPD7/UPP1/NME4/NME3	6
BP	GO:0021591	ventricular system development	6/1121	29/18723	0.00657566	0.0497745	0.0375045	CENPF/SLC7A11/AQP1/CELSR2/TSKU/C12orf57	6
BP	GO:0090025	regulation of monocyte chemotaxis	6/1121	29/18723	0.00657566	0.0497745	0.0375045	DUSP1/SERPINE1/SLIT2/CCL5/CXCL10/S100A7	6
CC	GO:0005874	microtubule	57/1172	429/19550	1.33104e-08	5.90147e-06	4.91789e-06	TUBA1C/KIF20A/MX2/PLK1/TPX2/MX1/KIF4A/HID1/DPP9/TUBA1B/GTSE1/AURKA/HNRNPU/MAPRE3/INCENP/KIF11/SKA3/KIF18B/CKAP2/EIF3A/CENPE/CCT5/KIF23/TUBB/NEK2/KIFC1/SKA1/TUBB6/SPAG5/NAV3/PBXIP1/SVIL/BIRC5/ARHGEF2/TUBG2/KIF14/KIF1C/MAP4/CKAP5/KIF3B/IQGAP1/TTLL1/TPPP3/LZTS2/DYNLT1/GRAMD2B/SHROOM3/KIF26B/MAP1LC3A/MID1/KIF20B/TUBB4A/ASPM/REEP2/ENKD1/TUBB2B/KCNAB2	57
CC	GO:0030496	midbody	34/1172	196/19550	1.96716e-08	5.90147e-06	4.91789e-06	KIF20A/PLK1/YPEL5/KIF4A/ANLN/SHCBP1/NTNG2/AURKA/HNRNPU/MAPRE3/AGAP2/INCENP/BCL3/PITPNM1/CENPE/KIF23/NEK2/CHMP3/SPAG5/SVIL/CDCA8/BIRC5/CENPF/KIF14/ECT2/KIF3B/IQGAP1/LZTS2/CHAMP1/KIF20B/TACC1/ASPM/ARL8A/UHMK1	34
CC	GO:0000775	chromosome, centromeric region	32/1172	198/19550	2.75628e-07	5.51257e-05	4.59381e-05	PLK1/BUB1B/CDCA5/NCAPD2/SPDL1/SGO2/CENPL/HNRNPU/OIP5/INCENP/SKA3/NCAPG/CENPE/NEK2/SKA1/NUP98/SPAG5/CENPN/SPC25/CDCA8/BIRC5/CENPI/CENPF/BUB1/KNL1/SMC4/CKAP5/SMC1A/CHAMP1/KMT5C/STAG1/CEBPB	32
CC	GO:0000779	condensed chromosome, centromeric region	26/1172	144/19550	4.01175e-07	6.01762e-05	5.01468e-05	PLK1/BUB1B/NCAPD2/SPDL1/SGO2/HNRNPU/INCENP/SKA3/NCAPG/CENPE/NEK2/SKA1/NUP98/SPAG5/CENPN/SPC25/BIRC5/CENPI/CENPF/BUB1/KNL1/CKAP5/SMC1A/CHAMP1/KMT5C/CEBPB	26
CC	GO:0062023	collagen-containing extracellular matrix	52/1172	425/19550	7.90492e-07	8.13356e-05	6.77797e-05	SFRP1/SDC2/SERPINE2/CCDC80/EFEMP1/TGFBI/GDF15/NTNG2/PLSCR1/SERPINE1/HNRNPM/ANGPTL2/CTSF/GPC2/LGALS9/SOST/S100A4/APLP1/COL6A1/THBS1/ADAMTS10/LAMA4/SERPINB8/LGALS3BP/LGALS3/BCAM/SERPINA5/CRELD1/SEMA3B/ACHE/ADAMTS15/MDK/COL9A3/P3H2/LOXL1/TIMP3/EFEMP2/VCAN/PTN/FBLN2/THBS3/WNT5A/S100A6/COL12A1/RELL2/PCOLCE/KAZALD1/EGFL7/S100A7/NAV2/PRTN3/ANG	52
CC	GO:0005819	spindle	49/1172	391/19550	8.13356e-07	8.13356e-05	6.77797e-05	KIF20A/PLK1/TPX2/YPEL5/BUB1B/KIF4A/SHCBP1/SPDL1/MYH9/FAM83D/AURKA/HNRNPU/MAPRE3/DLGAP5/INCENP/KIF11/SKA3/KIF18B/SLC25A5/CDC20/CKAP2/CENPE/KIF23/NEK2/KIFC1/SKA1/SPAG5/ESPL1/CDCA8/BIRC5/CENPF/ARHGEF2/TUBG2/KIF14/MAP4/ECT2/CKAP5/KIF3B/SMC1A/CHAMP1/DYNLT1/SNCG/MID1/KIF20B/STAG1/ASPM/BRCC3/ARL8A/IKBKG	49
CC	GO:0000793	condensed chromosome	34/1172	244/19550	3.89551e-06	0.0003339	0.00027825	PLK1/BUB1B/NCAPD2/SPDL1/SGO2/RCC1/HNRNPU/NOL6/INCENP/SKA3/NCAPG/CENPE/NEK2/SKA1/NUP98/SPAG5/CENPN/SPC25/BIRC5/CENPI/SMC2/CENPF/BRCA1/BUB1/STAG3L2/KNL1/CKAP5/P3H4/MKI67/SMC1A/CHAMP1/KMT5C/STAG1/CEBPB	34
CC	GO:0051233	spindle midzone	11/1172	36/19550	5.12705e-06	0.000384528	0.00032044	PLK1/AURKA/HNRNPU/MAPRE3/INCENP/KIF18B/CENPE/CDCA8/KIF14/KIF20B/ARL8A	11
CC	GO:0005925	focal adhesion	48/1172	418/19550	1.18745e-05	0.000791636	0.000659697	EZR/PPP1CB/CSRP1/CAV1/HSPA8/ITGBL1/CORO1C/PABPC1/B2M/JUP/MYH9/ITGA5/MAP4K4/MRC2/HMGA1/ITGB5/FLNA/PARVA/TLE2/SORBS2/AKAP12/KIF23/BCAR1/MCAM/SVIL/MARCKS/NRP1/RHOB/MMP14/ARHGEF2/RPLP0/GSN/IQGAP1/THY1/NECTIN2/LRP1/VIM/AHNAK/EFNB2/EPB41L2/VCL/FLNB/NEXN/MDC1/CSRP2/RRAS/EGFR/S100A7	48
CC	GO:0000776	kinetochore	22/1172	134/19550	1.50502e-05	0.000903012	0.00075251	PLK1/BUB1B/SPDL1/SGO2/HNRNPU/INCENP/SKA3/CENPE/NEK2/SKA1/NUP98/SPAG5/CENPN/SPC25/BIRC5/CENPI/CENPF/BUB1/KNL1/CKAP5/SMC1A/CHAMP1	22
CC	GO:0030055	cell-substrate junction	48/1172	425/19550	1.83933e-05	0.00100327	0.000836061	EZR/PPP1CB/CSRP1/CAV1/HSPA8/ITGBL1/CORO1C/PABPC1/B2M/JUP/MYH9/ITGA5/MAP4K4/MRC2/HMGA1/ITGB5/FLNA/PARVA/TLE2/SORBS2/AKAP12/KIF23/BCAR1/MCAM/SVIL/MARCKS/NRP1/RHOB/MMP14/ARHGEF2/RPLP0/GSN/IQGAP1/THY1/NECTIN2/LRP1/VIM/AHNAK/EFNB2/EPB41L2/VCL/FLNB/NEXN/MDC1/CSRP2/RRAS/EGFR/S100A7	48
CC	GO:0034399	nuclear periphery	21/1172	130/19550	2.99891e-05	0.00142868	0.00119057	KIF4A/POLA1/SFPQ/LMNB1/HNRNPM/UHRF1/HNRNPU/CAD/NUP98/ENC1/CENPF/ATF4/VIM/KRT8/SMC1A/ZNF703/STAG1/LMNTD2/NUP205/EBNA1BP2/CEBPB	21
CC	GO:0000940	outer kinetochore	6/1172	12/19550	3.09547e-05	0.00142868	0.00119057	PLK1/BUB1B/SPDL1/SKA3/SKA1/CENPF	6
CC	GO:0009925	basal plasma membrane	32/1172	257/19550	7.19298e-05	0.0030827	0.00256892	ATP1B1/EZR/HSP90AB1/SLC38A3/SLC29A4/CLDN4/RAB17/SLC5A6/SLC27A1/SLC1A3/SLC6A6/KCNJ10/ANK3/SLC4A11/ALPK2/LDLR/CA9/PALM/AQP2/TFRC/SLC6A9/AQP1/LRP1/CA11/MET/PIANP/SLC7A1/EGFR/KCNJ4/ABCA1/MLC1/SLC29A2	32
CC	GO:0072686	mitotic spindle	23/1172	161/19550	9.32478e-05	0.00372991	0.00310826	PLK1/TPX2/YPEL5/FAM83D/AURKA/HNRNPU/MAPRE3/KIF11/SKA3/KIF18B/CENPE/KIF23/KIFC1/SKA1/SPAG5/ESPL1/MAP4/ECT2/SMC1A/KIF20B/STAG1/ASPM/IKBKG	23
CC	GO:0045178	basal part of cell	33/1172	276/19550	0.000123113	0.00461672	0.00384727	ATP1B1/EZR/HSP90AB1/SLC38A3/SLC29A4/CLDN4/RAB17/SLC5A6/SLC27A1/SLC1A3/SLC6A6/KCNJ10/ANK3/SLC4A11/EDN1/ALPK2/LDLR/CA9/PALM/AQP2/TFRC/SLC6A9/AQP1/LRP1/CA11/MET/PIANP/SLC7A1/EGFR/KCNJ4/ABCA1/MLC1/SLC29A2	33
CC	GO:0150034	distal axon	34/1172	294/19550	0.000186772	0.00640305	0.00533588	RAB3A/CALB1/HNRNPR/HSP90AB1/NEFL/HSPA8/KCNIP3/PINK1/GLUL/HSP90AA1/CAD/FLNA/NTS/DRD2/WHRN/NRP1/EPS8/PREX1/ADGRL1/CBARP/IQGAP1/THY1/LRP1/BRSK1/RAC3/GPER1/DYNLT1/SNCG/BLVRB/KIF20B/GAP43/MYO5A/ANG/UCN	34
CC	GO:0005911	cell-cell junction	50/1172	494/19550	0.000204695	0.00640305	0.00533588	DDX58/ATP1B1/VEGFA/PCDH1/JUP/IQGAP3/SYNM/MYH9/ITGA5/FGFRL1/CLDN4/NF2/SCN4B/FLNA/ANK3/DLL1/PPL/JAM2/CYTH1/CCND1/AKR1B1/STARD10/VANGL2/ARHGEF2/EIF4G2/JAG1/FRMD5/PKP2/TJP3/SAPCD2/ECT2/KRT18/IQGAP1/NECTIN2/CDH10/CDH5/CADM4/KRT8/CDCA3/AHNAK/OBSL1/EFNB2/VCL/SHROOM3/NEXN/KLHL24/MXRA8/PDLIM4/MAGI3/TSPAN33	50
CC	GO:0097431	mitotic spindle pole	9/1172	36/19550	0.000209223	0.00640305	0.00533588	PLK1/YPEL5/FAM83D/AURKA/SPAG5/SMC1A/KIF20B/STAG1/ASPM	9
CC	GO:0005912	adherens junction	23/1172	170/19550	0.000213435	0.00640305	0.00533588	VEGFA/JUP/SYNM/MYH9/NF2/DLL1/CYTH1/EIF4G2/JAG1/FRMD5/PKP2/KRT18/NECTIN2/CDH10/CDH5/CDCA3/EFNB2/VCL/SHROOM3/NEXN/KLHL24/PDLIM4/TSPAN33	23
CC	GO:0098687	chromosomal region	38/1172	348/19550	0.000263301	0.00752288	0.00626906	PLK1/SP100/BUB1B/PPP1CB/CDCA5/NCAPD2/MCM4/SPDL1/SGO2/MCM2/CENPL/HNRNPU/OIP5/INCENP/SKA3/NCAPG/CENPE/NEK2/SKA1/NUP98/SPAG5/CENPN/SPC25/CDCA8/BIRC5/CENPI/CENPF/BUB1/KNL1/SMC4/CKAP5/SMC1A/CHAMP1/PIF1/KMT5C/STAG1/PRKDC/CEBPB	38
CC	GO:0016323	basolateral plasma membrane	28/1172	231/19550	0.000310511	0.00816518	0.00680432	ATP1B1/EZR/HSP90AB1/SLC38A3/SLC29A4/RAB17/SLC5A6/SLC6A6/KCNJ10/ANK3/SLC4A11/ALPK2/LDLR/CA9/PALM/AQP2/TFRC/SLC6A9/AQP1/LRP1/CA11/PIANP/SLC7A1/EGFR/KCNJ4/ABCA1/MLC1/SLC29A2	28
CC	GO:0005876	spindle microtubule	13/1172	72/19550	0.000312999	0.00816518	0.00680432	PLK1/KIF4A/AURKA/HNRNPU/MAPRE3/KIF11/SKA3/KIF18B/CENPE/SKA1/BIRC5/TUBG2/KIF3B	13
CC	GO:0005938	cell cortex	34/1172	308/19550	0.000444476	0.010927	0.0091058	CALB1/EZR/CAV1/ANLN/NCL/CORO1C/TNFAIP2/TMOD1/MLPH/MYH9/COTL1/AGTRAP/NEDD4/LANCL2/NF2/DLG4/FLNA/AKAP12/RHOBTB3/MARCKS/RHOB/EPS8/TRIP10/GSN/FER/SAPCD2/ECT2/EPB41L2/RAC3/FLNB/CRIP2/SHROOM3/PPFIA3/UTRN	34
CC	GO:0043034	costamere	6/1172	18/19550	0.00045529	0.010927	0.0091058	SYNM/ANK3/SVIL/KRT8/AHNAK/VCL	6
CC	GO:0042611	MHC protein complex	7/1172	25/19550	0.000505165	0.0109301	0.00910845	B2M/HLA-E/HLA-B/HLA-F/HLA-C/HLA-A/HLA-H	7
CC	GO:0045121	membrane raft	36/1172	335/19550	0.000510073	0.0109301	0.00910845	ATP1B1/EZR/UNC5B/FAIM2/CAV1/HSPD1/KCNMA1/CORO1C/CNTN1/PLSCR1/TUBA1B/CLN6/TGFBR2/SLC25A5/TUBB/DLL1/KDR/BST2/PLPP1/EFNB1/MAL/MYOF/ADD2/IQGAP1/THY1/F2R/S1PR1/AHNAK/PTPN11/IRS1/LAMTOR2/EGFR/ADRA1B/ABCA1/PRTN3/MLC1	36
CC	GO:0098857	membrane microdomain	36/1172	335/19550	0.000510073	0.0109301	0.00910845	ATP1B1/EZR/UNC5B/FAIM2/CAV1/HSPD1/KCNMA1/CORO1C/CNTN1/PLSCR1/TUBA1B/CLN6/TGFBR2/SLC25A5/TUBB/DLL1/KDR/BST2/PLPP1/EFNB1/MAL/MYOF/ADD2/IQGAP1/THY1/F2R/S1PR1/AHNAK/PTPN11/IRS1/LAMTOR2/EGFR/ADRA1B/ABCA1/PRTN3/MLC1	36
CC	GO:0005788	endoplasmic reticulum lumen	34/1172	313/19550	0.00059427	0.0122952	0.010246	SDC2/IGFBP5/B2M/CLN6/ARSB/NOTUM/IGFBP4/CSF1/PRSS23/COL6A1/THBS1/AFP/EDN1/TMEM132A/FOXRED2/CERCAM/COL9A3/P3H2/ARSA/APOL1/DNAJB9/SELENOM/VCAN/UGGT1/WNT5A/DBI/SCG2/COL12A1/MSLN/TGOLN2/IL23A/MXRA8/WNT6/TSPAN33	34
CC	GO:0005871	kinesin complex	10/1172	50/19550	0.000657083	0.0131417	0.0109514	KIF20A/KIF11/KIF18B/KIF23/KIFC1/KIF14/KIF1C/KIF3B/KIF26B/KIF20B	10
CC	GO:0031594	neuromuscular junction	12/1172	70/19550	0.000855207	0.0165524	0.0137937	SERPINE2/NEFL/MYH9/SYNGR3/DLG4/ANK3/SYNGR1/NRG1/ACHE/F2R/PTN/UTRN	12
CC	GO:0016363	nuclear matrix	16/1172	111/19550	0.000939293	0.0176118	0.0146765	KIF4A/POLA1/SFPQ/LMNB1/HNRNPM/UHRF1/HNRNPU/CAD/ENC1/CENPF/VIM/KRT8/SMC1A/ZNF703/STAG1/CEBPB	16
CC	GO:0098576	lumenal side of membrane	8/1172	36/19550	0.00109237	0.0195212	0.0162676	HSPA8/HLA-E/HLA-B/HLA-F/HLA-C/HLA-A/AQP2/HLA-H	8
CC	GO:0044291	cell-cell contact zone	12/1172	72/19550	0.0011062	0.0195212	0.0162676	ATP1B1/JUP/FGFRL1/SCN4B/ANK3/JAM2/PKP2/NECTIN2/CADM4/AHNAK/OBSL1/VCL	12
CC	GO:0000922	spindle pole	21/1172	170/19550	0.0013092	0.0224434	0.0187028	PLK1/TPX2/YPEL5/SPDL1/FAM83D/AURKA/HNRNPU/DLGAP5/KIF11/CDC20/CKAP2/NEK2/SPAG5/CENPF/CKAP5/SMC1A/KIF20B/STAG1/ASPM/BRCC3/IKBKG	21
CC	GO:0005881	cytoplasmic microtubule	12/1172	75/19550	0.00159493	0.0265822	0.0221519	TUBA1C/HID1/TUBA1B/GTSE1/MAPRE3/KIF18B/TUBG2/DYNLT1/GRAMD2B/MID1/REEP2/ENKD1	12
CC	GO:0030863	cortical cytoskeleton	15/1172	108/19550	0.00195356	0.0316794	0.0263995	CALB1/EZR/ANLN/TMOD1/MLPH/MYH9/COTL1/LANCL2/NF2/DLG4/FLNA/GSN/EPB41L2/SHROOM3/UTRN	15
CC	GO:0070938	contractile ring	4/1172	10/19550	0.00201505	0.0318166	0.0265138	ANLN/MYH9/KIF20B/UTRN	4
CC	GO:0030426	growth cone	21/1172	177/19550	0.00216745	0.0333453	0.0277878	HNRNPR/HSP90AB1/NEFL/PINK1/HSP90AA1/FLNA/WHRN/NRP1/EPS8/PREX1/ADGRL1/CBARP/IQGAP1/THY1/LRP1/RAC3/DYNLT1/KIF20B/GAP43/MYO5A/ANG	21
CC	GO:0016324	apical plasma membrane	36/1172	367/19550	0.0025639	0.0383525	0.0319604	ATP1B1/EZR/HSP90AB1/KCNE4/KCNMA1/SLC16A2/SLC38A3/SLC29A4/SCNN1A/CLDN4/RAB17/SLC5A6/KCNK1/SLC6A6/SORBS2/DLL1/SLC4A11/BST2/PLPP1/MAL/AQP2/VANGL2/JAG1/SAPCD2/SLC6A9/AQP1/THY1/SHROOM3/TCIRG1/SLC22A18/AKR1A1/ASPM/SLC7A1/EGFR/SLC15A1/IGFBP2	36
CC	GO:0090575	RNA polymerase II transcription regulator complex	20/1172	168/19550	0.00262075	0.0383525	0.0319604	FOS/SFPQ/TAF9B/HMGA1/JUNB/E2F8/HIF1A/MXI1/SMAD6/SMAD3/LMO4/GEMIN5/JUN/TRIM28/E2F2/ATF4/GTF2B/JUND/HIPK2/CEBPB	20
CC	GO:0097386	glial cell projection	7/1172	33/19550	0.00295024	0.0401276	0.0334397	EZR/PINK1/GLUL/KCNJ10/AKR1B1/ABCA7/SLC7A11	7
CC	GO:0098686	hippocampal mossy fiber to CA3 synapse	7/1172	33/19550	0.00295024	0.0401276	0.0334397	CALB1/RNF19A/SYT12/EFNB3/SLC6A9/RAPGEF4/GPER1	7
CC	GO:1990752	microtubule end	7/1172	33/19550	0.00295024	0.0401276	0.0334397	MAPRE3/KIF18B/SPAG5/NAV3/SVIL/CKAP5/ASPM	7
CC	GO:0031225	anchored component of membrane	20/1172	170/19550	0.00300957	0.0401276	0.0334397	RAB3A/NTNG2/CNTN1/NT5E/LY6E/GPC2/NEGR1/LSAMP/LYPD1/BST2/GFRA1/NTM/ACHE/EFNA1/RAB26/THY1/EFNA3/SMPDL3B/MSLN/CD109	20
CC	GO:0030016	myofibril	25/1172	231/19550	0.00311842	0.040542	0.033785	CSRP1/TPM3/TPM1/CORO1C/JUP/FBXO32/TMOD1/SYNM/FLNA/PARVA/SORBS2/ANK3/SVIL/KRT8/AHNAK/OBSL1/KCNJ8/VCL/FLNB/NEXN/TNNT1/CSRP2/PDLIM4/FKBP1B/TPM2	25
CC	GO:0016328	lateral plasma membrane	10/1172	61/19550	0.00317706	0.040542	0.033785	ATP1B1/CORO1C/JUP/IQGAP3/CLDN4/ANK3/DRD2/VANGL2/SLC6A9/VANGL1	10
CC	GO:0030427	site of polarized growth	21/1172	183/19550	0.00324336	0.040542	0.033785	HNRNPR/HSP90AB1/NEFL/PINK1/HSP90AA1/FLNA/WHRN/NRP1/EPS8/PREX1/ADGRL1/CBARP/IQGAP1/THY1/LRP1/RAC3/DYNLT1/KIF20B/GAP43/MYO5A/ANG	21
CC	GO:0005667	transcription regulator complex	39/1172	413/19550	0.0034021	0.0416584	0.0347153	FOS/SOX4/SFPQ/ARNTL2/KLF4/TAF9B/TEAD3/NR4A1/HMGA1/JUNB/E2F8/HIF1A/TLE2/MXI1/SMAD6/SMAD3/LMO4/BEX1/CCND1/PBXIP1/RARG/FOXF1/GEMIN5/JUN/DEPDC1/TRIM28/E2F2/ATF4/GTF2B/SOX2/SIX4/ATF5/RCOR2/RBL1/JUND/PRKDC/HIPK2/CREG1/CEBPB	39
CC	GO:0005635	nuclear envelope	43/1172	468/19550	0.00360076	0.0432091	0.0360076	RANBP3L/MX2/MX1/RRM1/IPO5/GLE1/POLA1/LMNB1/DHX37/SREBF1/KPNB1/RCC1/NR4A1/LMNB2/CCAR1/TUBB/SMAD3/NUP188/TMPO/NUP98/PHF11/NAV3/CCND1/MYOF/PRICKLE1/CENPF/IFI27/SMOX/AQP1/CDH5/GCH1/NDC1/GPER1/S100A6/IPO7/SLC22A18/NUP205/EGFR/ADRA1B/TM7SF2/GPX4/WDFY3/SLC29A2	43
CC	GO:0044853	plasma membrane raft	15/1172	116/19550	0.0039371	0.0463188	0.038599	ATP1B1/EZR/CAV1/KCNMA1/CORO1C/TGFBR2/PLPP1/MYOF/ADD2/F2R/PTPN11/IRS1/ADRA1B/PRTN3/MLC1	15
CC	GO:0018995	host cellular component	4/1172	12/19550	0.00431243	0.0488199	0.0406833	IFIT1/AXL/AQP1/DYNLT1	4
CC	GO:0043657	host cell	4/1172	12/19550	0.00431243	0.0488199	0.0406833	IFIT1/AXL/AQP1/DYNLT1	4
MF	GO:0003725	double-stranded RNA binding	16/1144	74/18368	1.00468e-05	0.00977591	0.00889387	DDX58/OAS1/HSP90AB1/ILF3/HSPD1/OASL/TUBA1B/IFIH1/HNRNPU/DHX9/OAS2/DHX58/NLRP1/TFRC/VIM/DDX60	16
MF	GO:0008017	microtubule binding	35/1144	271/18368	3.38052e-05	0.00977591	0.00889387	KIF20A/MX2/PLK1/TPX2/EZR/MX1/KIF4A/BCL2L11/FAM83D/GTSE1/MAPRE3/DLGAP5/MAP4K4/KIF11/KIF18B/CENPE/KIF23/KIFC1/SKA1/SPAG5/NAV3/BIRC5/CENPF/ARHGEF2/KIF14/MAST1/KIF1C/MAP4/CKAP5/KIF3B/KIF26B/MAP1LC3A/MID1/KIF20B/REEP2	35
MF	GO:0015631	tubulin binding	44/1144	375/18368	3.93126e-05	0.00977591	0.00889387	KIF20A/MX2/PLK1/TPX2/EZR/MX1/ARL4C/KIF4A/BCL2L11/FAM83D/GTSE1/MAPRE3/DLGAP5/MAP4K4/KIF11/KIF18B/CENPE/CCT5/KIF23/KIFC1/SKA1/SPAG5/NAV3/BIRC5/CENPF/BRCA1/ARHGEF2/KIF14/MAST1/KIF1C/MAP4/CKAP5/KIF3B/TTLL1/TPPP3/BRSK1/ATF5/RGS2/KIF26B/MAP1LC3A/MID1/KIF20B/REEP2/ARL8A	44
MF	GO:0008574	plus-end-directed microtubule motor activity	7/1144	17/18368	3.99017e-05	0.00977591	0.00889387	KIF11/KIF18B/CENPE/KIF14/KIF1C/KIF3B/KIF20B	7
MF	GO:0003714	transcription corepressor activity	26/1144	187/18368	9.96835e-05	0.019538	0.0177751	TRIM22/TOB1/MYBBP1A/HMGA2/BTG2/TAF9B/LMCD1/HNRNPU/NCOA5/BCL3/CCAR1/TLE2/NOC2L/IRF2BPL/CCND1/PBXIP1/MAP3K10/TRIM28/PARP14/RCOR2/CIR1/PARP10/HIPK2/NAB2/CREG1/ARID5A	26
MF	GO:0008201	heparin binding	23/1144	166/18368	0.000258216	0.0357813	0.032553	SFRP1/SERPINE2/LGR6/CCDC80/VEGFA/CFH/FGFRL1/SOST/APLP1/THBS1/SLIT2/SERPINA5/NRP1/NDNF/ADAMTS15/MDK/EFEMP2/PTN/THBS3/CXCL10/PCOLCE/NAV2/ANG	23
MF	GO:0008106	alcohol dehydrogenase (NADP+) activity	7/1144	22/18368	0.000265674	0.0357813	0.032553	AKR1C1/AKR1C3/AKR1B1/AKR1C2/DHRS3/AKR1A1/DHRS13	7
MF	GO:0004033	aldo-keto reductase (NADP) activity	8/1144	29/18368	0.000292093	0.0357813	0.032553	AKR1C1/AKR1C3/AKR1B1/AKR1C2/DHRS3/AKR1A1/DHRS13/KCNAB2	8
MF	GO:0004032	alditol:NADP+ 1-oxidoreductase activity	5/1144	12/18368	0.00050863	0.0455985	0.0414843	AKR1C1/AKR1C3/AKR1B1/AKR1C2/AKR1A1	5
MF	GO:0005539	glycosaminoglycan binding	28/1144	230/18368	0.00052766	0.0455985	0.0414843	SFRP1/SERPINE2/LGR6/CCDC80/VEGFA/CFH/FGFRL1/TGFBR2/HMMR/SOST/APLP1/THBS1/HAPLN3/SLIT2/SERPINA5/NRP1/NDNF/ADAMTS15/MDK/EFEMP2/VCAN/PTN/CEMIP/THBS3/CXCL10/PCOLCE/NAV2/ANG	28
MF	GO:1901681	sulfur compound binding	31/1144	265/18368	0.000545998	0.0455985	0.0414843	SFRP1/SERPINE2/LGR6/CCDC80/VEGFA/CFH/RCC1/FGFRL1/SOST/APLP1/THBS1/PC/SLIT2/SERPINA5/NRP1/NDNF/OGDHL/ADAMTS15/MDK/HS3ST5/LRP1/EFEMP2/PTN/THBS3/KMT5C/DBI/CXCL10/PCOLCE/GSTM3/NAV2/ANG	31
MF	GO:0047834	D-threo-aldose 1-dehydrogenase activity	6/1144	18/18368	0.000558349	0.0455985	0.0414843	AKR1C1/AKR1C3/AKR1B1/AKR1C2/AKR1A1/KCNAB2	6
